# Supplementary material for: Genome-Wide Association Study and QTL Meta-Analysis Identified Novel Genomic Loci Controlling Potassium Use Efficiency and Agronomic Traits in Bread Wheat
Source: Front Plant Sci. 2020 Feb 18;11:70. doi: 10.3389/fpls.2020.00070 (PMC7041172; doi:10.3389/fpls.2020.00070)
Supplement: Supplementary file 6 [file Table_6.xlsx]

## Sheet: Table S6a
	Table S6a. MTA identified by multi-locus GWAS models.
	Sno	Trait*	Method	SNP Name	Chr	Marker Position (bp)	QTN effect	LOD score	-log10p	r2 (%)	MAF	Genotype for code 1	Var_Error	Var_phen (total)
	1	GpS_C_2016	mrMLM	BS00064204_51	1A	38699	-15.8708	3.7374	4.47555	40.0032	0.4859	T	25.0396	48.0483
	2	GpS_C_2016	FASTmrMLM	BS00064204_51	1A	38699	-13.4005	3.7374	4.4755	33.0713	0.4863	NN	28.8457	48.0483
	3	SpS_C_2018	FASTmrMLM	BS00064204_51	1A	38699	-6.3463	5.5712	6.3892	38.0476	0.4888	NN	3.9069	6.6588
	4	SpS_C_2018	pLARmEB	BS00064204_51	1A	38699	-4.8772	3.4108	4.131	26.539	0.4888	NN	3.7576	6.6588
	5	RL_T_2018	pLARmEB	BS00064204_51	1A	38699	19	3.0122	3.7082	17.3819	0.4888	NN	112.98	152.233
	6	TKW_C_2018	FASTmrEMMA	BS00059424_51	1A	3760700	-3.3921	3.3186	4.0334	7.2397	0.4719	NN	29.0738	36.0368
	7	HI_C_2017	FASTmrMLM	Ra_c2029_3163	1A	4500589	-4.8563e-05	4.2858	5.0511	1.8756e-05	0.0506	AA	0.0026	0.0046
	8	HI_C_2017	pLARmEB	Ra_c2029_3163	1A	4500589	-2.2019e-05	4.7243	5.509	3.8558e-06	0.0506	AA	0.002	0.0046
	9	FW_T_H	FASTmrMLM	wsnp_RFL_Contig4735_5673999	1A	7658364	-9.592e-05	8.251	9.1494	0.0032	0.4888	TT	0.0001	0.0003
	10	RL_T_2018	mrMLM	wsnp_Ex_c7965_13520238	1A	12369332	5.15	4.8894	5.68103	15.4483	0.4138	A	96.2289	152.233
	11	HI_C_2016	mrMLM	Tdurum_contig42479_3110	1A	12506082	13.1667	3.4672	4.19061	32.7662	0.0563	T	98.8546	136.896
	12	RL_T_2018	FASTmrEMMA	RAC875_c20875_753	1A	12590674	7.0273	3.0698	3.7695	6.4523	0.3483	GG	124.993	152.233
	13	KUE_C_2017	FASTmrMLM	BS00039749_51	1A	20889691	9.9593e-05	4.4817	5.2559	0.0045	0.0281	CC	0	0
	14	FW_T_H	FASTmrMLM	Excalibur_c25050_372	1A	27260788	-0.0003	8.9171	9.8316	0.0262	0.3258	CC	0.0001	0.0003
	15	NA_T_H	FASTmrEMMA	BobWhite_c23763_350	1A	28361176	108674	4.2205	4.9827	8.291	0.4775	GG	2.05261e+10	3.19381e+10
	16	Fe_C_2017	mrMLM	Tdurum_contig8382_300	1A	29611971	2.8175	3.9217	4.66935	9.5123	0.4885	C	70.2976	83.1566
	17	KUE_T_2018	pLARmEB	Excalibur_c47654_70	1A	49097391	-0.0005	11.938	12.9132	0.3639	0.264	GG	0	0.0001
	18	KUE_T_2018	pLARmEB	RAC875_c10659_1539	1A	57764926	0.0003	6.5208	7.3708	0.0314	0.0674	CC	0	0.0001
	19	CHL_B_C_2017	pLARmEB	wsnp_Ku_rep_c107796_93118214	1A	73313141	-1.577	6.0842	6.9201	9.0177	0.0899	CC	3.2492	6.3638
	20	DM_C_2017	mrMLM	GENE-0032_895	1A	111131501	1.6647	4.9852	5.78073	15.8426	0.2586	A	6.7323	11.0976
	21	DM_C_2017	FASTmrMLM	GENE-0032_895	1A	111131501	1.2395	3.8128	4.5549	9.6473	0.2753	AA	7.8832	11.0976
	22	DM_C_2017	FASTmrEMMA	GENE-0032_895	1A	111131501	2.354	3.5605	4.2892	8.6991	0.2753	AA	7.262	11.0976
	23	DM_C_2017	pLARmEB	GENE-0032_895	1A	111131501	1.0495	3.5119	4.2378	6.9171	0.2753	AA	7.0788	11.0976
	24	K_T_2017	mrMLM	IACX11112	1A	251590348	-9.4388	3.9806	4.7312	6.4298	0.2414	G	274.224	528.921
	25	K_T_2017	FASTmrMLM	IACX11112	1A	251590348	-8.0819	4.9293	5.7226	5.5427	0.236	GG	289.521	528.921
	26	K_T_2017	pLARmEB	IACX11112	1A	251590348	-7.0962	3.9665	4.7164	2.7208	0.236	GG	271.872	528.921
	27	KUpE_T_2017	mrMLM	IACX11112	1A	251590348	-0.1049	3.9806	4.7312	6.4298	0.2414	G	0.0339	0.0653
	28	KUpE_T_2017	FASTmrMLM	IACX11112	1A	251590348	-0.0905	4.9293	5.7226	5.6406	0.236	GG	0.0356	0.0653
	29	KUpE_T_2017	pLARmEB	IACX11112	1A	251590348	-0.0854	4.9191	5.7119	3.5962	0.236	GG	0.0316	0.0653
	30	KUtE_C_2017	FASTmrMLM	wsnp_Ex_c44049_50205904	1A	337678122	-0.001	4.4558	5.2288	0.4161	0.1573	GG	0	0.0001
	31	KUtE_C_2017	pLARmEB	wsnp_Ex_c44049_50205904	1A	337678122	-0.0017	9.3357	10.2597	1.1276	0.1573	GG	0	0.0001
	32	NA_C_H	pLARmEB	RAC875_c41113_144	1A	343410529	-2.0589	5.1412	5.9429	12.9992	0.1685	CC	11.7684	16.5406
	33	Na+_C_H	pLARmEB	RAC875_c41113_144	1A	343410529	-2.0589	5.1412	5.9429	12.9992	0.1685	CC	11.7684	16.5406
	34	SpL_C_2018	pLARmEB	Ex_c5192_943	1A	485002381	0.3903	5.9427	6.7738	4.8699	0.1629	TT	0.3848	1.2931
	35	FW_T_H	FASTmrMLM	Ex_c5192_943	1A	485002381	-0.0009	11.6745	12.6452	0.1878	0.1629	TT	0.0001	0.0003
	36	KUpE_T_2018	FASTmrMLM	BS00022733_51	1A	490313537	0.0003	3.5184	4.2447	0.0001	0.3315	AA	0.0548	0.0605
	37	KUtE_C_2017	pLARmEB	wsnp_Ku_c21316_31053745	1A	498141636	0.0006	9.1152	10.0342	0.1833	0.2809	TT	0	0.0001
	38	KUtE_C_2017	FASTmrMLM	CAP12_c1906_217	1A	498451048	0.0009	3.9167	4.6641	0.492	0.4494	TT	0	0.0001
	39	GpS_C_2016	mrMLM	wsnp_Ex_c3293_6072122	1A	505471050	-3.6369	3.5951	4.32561	8.521	0.2324	A	25.0396	48.0483
	40	GpS_C_2016	FASTmrMLM	wsnp_Ex_c3293_6072122	1A	505471050	-2.7799	3.5951	4.3256	5.7732	0.2397	AA	28.8457	48.0483
	41	GpS_C_2016	FASTmrEMMA	wsnp_Ex_c3293_6072122	1A	505471050	-4.8296	3.0573	3.7562	6.0215	0.2397	AA	33.0697	48.0483
	42	CHL_H_C_2017	pLARmEB	RAC875_c100147_55	1A	507078601	-1.037e-05	3.5292	4.2561	1.559e-09	0.4719	CC	5.7708	6.7807
	43	KUtE_C_2017	pLARmEB	wsnp_Ku_c1642_3232242	1A	507079382	0.0011	14.3228	15.3525	0.7915	0.3652	TT	0	0.0001
	44	KUE_C_2017	FASTmrMLM	Kukri_c31891_1355	1A	508640934	0.0006	14.2884	15.3525	0.8896	0.3933	AA	0	0
	45	CHL_T_C_2017	mrMLM	wsnp_Ex_c6452_11213329	1A	508640961	-0.887	3.3447	4.06108	9.6719	0.3563	A	4.1891	5.6834
	46	KUE_C_2017	FASTmrMLM	Kukri_rep_c109473_80	1A	514138353	0.0006	8.0027	8.8948	0.8479	0.4213	CC	0	0
	47	RL_T_2018	mrMLM	RAC875_c45115_509	1A	517489531	-6.0594	4.5442	5.32115	18.8506	0.431	T	96.2289	152.233
	48	KUtE_C_2017	FASTmrMLM	BobWhite_c12977_65	1A	520579715	-0.0007	3.9371	4.6855	0.0647	0.2865	CC	0	0.0001
	49	KUE_C_2017	FASTmrMLM	BobWhite_c12977_65	1A	520579715	1.1045e-05	4.0709	4.8259	5.5296e-05	0.2865	CC	0	0
	50	GY_C_2017	FASTmrMLM	Excalibur_c29605_535	1A	520579915	0.5014	7.5706	8.4512	19.0841	0.4607	CC	0.8921	1.2273
	51	GY_C_2017	FASTmrEMMA	Excalibur_c29605_535	1A	520579915	0.7101	3.1016	3.8033	9.2855	0.4607	CC	0.9188	1.2273
	52	GY_C_2017	pLARmEB	Excalibur_c29605_535	1A	520579915	0.4055	4.2083	4.9699	9.3339	0.4607	CC	0.7511	1.2273
	53	KUE_C_2017	FASTmrMLM	Excalibur_c29605_535	1A	520579915	0.0008	6.4286	7.2757	1.7869	0.4607	CC	0	0
	54	PH_C_2016	FASTmrEMMA	RAC875_c102343_204	1A	534271908	6.0325	4.5373	5.314	12.1977	0.3014	CC	35.5433	58.7275
	55	LA_C_2017	FASTmrEMMA	wsnp_BG606986A_Ta_2_1	1A	535315071	3.3084	3.0039	3.6994	7.4622	0.4719	CC	27.9974	31.6104
	56	SpS_C_2018	FASTmrMLM	BobWhite_c23632_322	1A	539762835	-1.2078	6.0962	6.9325	13.2578	0.2584	AA	3.9069	6.6588
	57	SpS_C_2018	pLARmEB	BobWhite_c23632_322	1A	539762835	-1.3821	8.0827	8.9768	20.5043	0.2584	AA	3.7576	6.6588
	58	CHL_H_T_2017	pLARmEB	IAAV130	1A	541893860	-1.2968	3.9638	4.7136	2.9053	0.0337	AA	1.6805	3.2157
	59	KUE_C_2017	pLARmEB	BS00095510_51	1A	543961391	0.0005	9.7311	10.6637	0.6463	0.2753	AA	0	0
	60	KUtE_T_2017	pLARmEB	BS00078085_51	1A	544055625	0.0006	7.9388	8.8292	0.3487	0.2809	TT	0	0.0001
	61	KUE_C_2018	FASTmrMLM	wsnp_BE494527A_Ta_2_1	1A	547299571	-0.0005	15.084	15.9546	0.5681	0.2978	TT	0	0
	62	GY_C_2018	FASTmrMLM	BobWhite_c19182_280	1A	566480220	-0.4008	3.9691	4.7191	12.6201	0.427	GG	0.9893	1.2599
	63	GY_C_2018	FASTmrEMMA	BobWhite_c19182_280	1A	566480220	-0.7356	3.5084	4.2342	10.0259	0.427	GG	1.0841	1.2599
	64	KUE_C_2018	FASTmrMLM	BobWhite_c19182_280	1A	566480220	-0.0005	3.8895	4.6355	0.7518	0.427	GG	0	0
	65	KUE_C_2018	pLARmEB	BobWhite_c19182_280	1A	566480220	-0.0007	3.5039	4.2294	1.121	0.427	GG	0	0
	66	FW_T_H	pLARmEB	tplb0021i12_383	1A	568025559	0.0003	5.7948	6.6208	0.0164	0.2247	TT	0.0001	0.0003
	67	KUE_C_2018	FASTmrMLM	RAC875_c23586_541	1A	568417022	-0.0008	7.3457	8.2201	1.1103	0.1573	GG	0	0
	68	BY_T_2018	pLARmEB	Excalibur_c88792_93	1A	574338358	0.4975	4.8346	5.624	4.3793	0.3989	TT	1.7564	2.9564
	69	BY_C_2016	pLARmEB	Excalibur_c17320_833	1A	575228804	0.5343	6.1449	6.9828	10.8323	0.3288	TT	0.9318	2.0545
	70	Na+_T_2017	mrMLM	RAC875_c32582_294	1A	577787523	2.9704	3.6832	4.41847	19.1712	0.0345	T	4.6961	6.58
	71	Na+_T_2017	FASTmrMLM	RAC875_c32582_294	1A	577787523	2.1889	3.7071	4.4436	12.4659	0.0337	TT	4.3144	6.58
	72	Na+_T_2017	pLARmEB	RAC875_c32582_294	1A	577787523	2.1889	3.7071	4.4436	12.2302	0.0337	TT	4.3145	6.58
	73	KUE_C_2017	FASTmrMLM	wsnp_Ex_c48407_53323483	1A	579864880	-0.0003	7.5846	8.4656	0.0871	0.1742	TT	0	0
	74	KUtE_C_2018	pLARmEB	wsnp_Ex_c271_521429	1A	580422354	-0.0004	4.6296	5.4103	0.1532	0.4719	CC	0	0.0001
	75	KUtE_C_2017	pLARmEB	RAC875_c52947_338	1A	580496484	-0.0007	14.5166	15.4775	0.1787	0.0843	TC	0	0.0001
	76	TN_C_2017	FASTmrEMMA	CAP11_c1500_171	1A	581543360	0.6343	4.1868	4.9474	17.1601	0.1517	AA	0.2335	0.2951
	77	KUtE_C_2017	pLARmEB	wsnp_Ra_c6891_11974621	1A	581585520	0.0009	10.3421	11.2874	0.2098	0.1461	TT	0	0.0001
	78	KUE_C_2017	FASTmrMLM	wsnp_Ra_c6891_11974621	1A	581585520	0.0004	10.7226	11.6754	0.1766	0.1461	TT	0	0
	79	RL_C_2017	mrMLM	Excalibur_c85499_232	1A	582219427	3.1601	3.0047	3.70025	12.8149	0.2113	T	28.182	52.7719
	80	RL_C_2017	FASTmrMLM	Excalibur_c85499_232	1A	582219427	2.5809	3.0047	3.7003	8.6405	0.2055	TT	32.5679	52.7719
	81	RL_C_2017	FASTmrEMMA	Excalibur_c85499_232	1A	582219427	7.0313	3.9848	4.7356	14.6533	0.2055	TT	42.5905	52.7719
	82	FW_C_H	FASTmrMLM	BS00065170_51	1A	582749025	-0.0016	3.7975	4.5388	0.5118	0.3034	TT	0.0001	0.0005
	83	FW_C_H	FASTmrMLM	RAC875_c62550_470	1A	583894934	0.0018	5.1509	5.953	0.602	0.2865	TT	0.0001	0.0005
	84	NA_C_H	mrMLM	Kukri_c36428_156	1A	583925852	1.3208	3.4457	4.16789	4.8865	0.3103	G	6.8329	16.5406
	85	Na+_C_H	mrMLM	Kukri_c36428_156	1A	583925852	1.3208	3.4457	4.16789	4.8865	0.3103	G	6.8329	16.5406
	86	GY_C_2016	FASTmrEMMA	Kukri_c15691_151	1A	584355459	0.8277	3.4237	4.1447	11.2238	0.4726	TT	0.8512	1.1659
	87	HI_T_2016	mrMLM	BobWhite_c12960_138	1A	584674470	-6.5284	4.6505	5.43208	17.1899	0.1761	G	67.8796	142.625
	88	HI_T_2016	FASTmrMLM	BobWhite_c12960_138	1A	584674470	-4.1574	3.376	4.0942	7.6581	0.1712	GG	85.0659	142.625
	89	HI_T_2016	pLARmEB	BobWhite_c12960_138	1A	584674470	-2.8378	3.1743	3.8805	3.8653	0.1712	GG	50.1635	142.625
	90	KUE_C_2018	FASTmrMLM	wsnp_Ex_c1861_3507281	1A	589030192	-0.0006	4.2615	5.0256	0.704	0.1629	AA	0	0
	91	PH_T_2018	FASTmrMLM	IAAV1301	1A	589874399	-2.3503	5.7162	6.5394	10.6595	0.3989	AA	32.7052	51.2913
	92	KUE_C_2018	pLARmEB	Kukri_c43479_207	1A	590343100	-0.0004	11.5904	12.5594	0.4757	0.264	AA	0	0
	93	Na+_T_H	FASTmrMLM	RFL_Contig858_2219	1A	591147683	1.4068	3.5927	4.3231	10.2203	0.4157	CC	9.9098	12.9274
	94	Na+_T_H	FASTmrEMMA	RFL_Contig858_2219	1A	591147683	2.7674	3.9198	4.6673	8.7317	0.4157	CC	8.5308	12.9274
	95	TN_T_2017	mrMLM	Tdurum_contig47006_1105	1A	593549077	-0.1922	5.7176	6.54083	29.4676	0.1724	T	0.0302	0.0817
	96	TN_T_2017	FASTmrMLM	Tdurum_contig47006_1105	1A	593549077	-0.1693	5.0673	5.8661	26.022	0.1685	TT	0.037	0.0817
	97	PH_C_2016	FASTmrMLM	BS00050522_51	1B	1433795	-2.6393	3.2959	4.0094	9.4694	0.226	GG	32.9174	58.7275
	98	KUE_C_2017	FASTmrMLM	RAC875_c48669_292	1B	1524033	0.0006	8.9646	9.8802	0.1561	0.0843	GG	0	0
	99	K_T_2017	mrMLM	Excalibur_c5562_380	1B	2263534	-9.83	3.7765	4.5167	7.57	0.2356	G	274.224	528.921
	100	K_T_2017	FASTmrMLM	Excalibur_c5562_380	1B	2263534	-6.7872	3.0444	3.7425	4.2432	0.2303	GG	289.521	528.921
	101	K_T_2017	pLARmEB	Excalibur_c5562_380	1B	2263534	-7.15	3.6821	4.4173	2.9983	0.2303	GG	271.872	528.921
	102	KUpE_T_2017	mrMLM	Excalibur_c5562_380	1B	2263534	-0.1092	3.7765	4.5167	7.57	0.2356	G	0.0339	0.0653
	103	KUpE_T_2017	FASTmrMLM	Excalibur_c5562_380	1B	2263534	-0.0738	3.0444	3.7425	4.0727	0.2303	GG	0.0356	0.0653
	104	KUpE_T_2017	pLARmEB	Excalibur_c5562_380	1B	2263534	-0.0699	3.0125	3.7086	2.6113	0.2303	GG	0.0316	0.0653
	105	FW_C_H	FASTmrMLM	BS00065257_51	1B	8121653	-0.0004	4.3234	5.0904	0.028	0.4326	GG	0.0001	0.0005
	106	KUE_T_2018	FASTmrMLM	IAAV3773	1B	8204540	0.0001	3.88	4.6255	0.0082	0.0618	GG	0	0.0001
	107	KUE_T_2017	pLARmEB	GENE-1118_1049	1B	8222519	8.8697e-05	11.9943	12.9705	0.0073	0.0506	TT	0	0
	108	DM_T_2017	pLARmEB	Tdurum_contig76266_134	1B	15166145	2.2848	4.8634	5.654	26.7548	0.0955	CC	3.8877	5.8373
	109	KUE_T_2018	pLARmEB	Tdurum_contig44219_165	1B	15169335	-1.0533e-05	4.4664	5.2399	3.0388e-05	0.0225	GG	0	0.0001
	110	CHL_14DAG_T_H	pLARmEB	BS00027613_51	1B	51991253	1.4333	4.4045	5.1752	23.954	0.3483	TC	4.0403	7.9209
	111	RW_T_H	mrMLM	Tdurum_contig75938_1546	1B	57003428	-0.3707	3.8988	4.64529	6.6956	0.3793	C	0.5649	1.1757
	112	RW_T_H	pLARmEB	Tdurum_contig75938_1546	1B	57003428	-0.2044	4.7653	5.5518	2.3575	0.3933	CC	0.4896	1.1757
	113	KUtE_T_2017	FASTmrMLM	BS00022319_51	1B	57430658	0.0002	9.9494	10.8866	0.0393	0.4663	TC	0	0.0001
	114	KUtE_T_2017	pLARmEB	BS00022319_51	1B	57430658	-0.0003	12.0351	13.0121	0.1477	0.4663	TC	0	0.0001
	115	KUtE_T_2017	FASTmrMLM	BS00066014_51	1B	59514595	-0.0006	9.0076	9.9241	0.4722	0.4382	AG	0	0.0001
	116	KUtE_T_2017	pLARmEB	BS00066014_51	1B	59514595	-0.0011	8.8236	9.7359	1.5766	0.4382	AG	0	0.0001
	117	KUtE_T_2018	pLARmEB	Excalibur_c6952_263	1B	69823889	-0.0006	13.1376	14.135	0.0494	0.0506	AA	0	0.0001
	118	KUE_T_2018	pLARmEB	Excalibur_c6952_263	1B	69823889	-0.0005	10.4417	11.389	0.0791	0.0506	AA	0	0.0001
	119	KUE_T_2018	FASTmrMLM	Ra_c69176_1308	1B	107136692	0.0005	5.4116	6.2237	0.1409	0.0787	TT	0	0.0001
	120	FW_C_H	mrMLM	Excalibur_c32472_263	1B	108218026	-0.0463	3.6023	4.33321	17.9869	0.0115	A	0.0002	0.0005
	121	FW_C_H	FASTmrMLM	Excalibur_c32472_263	1B	108218026	-0.0005	13.6626	14.6758	0.0039	0.0112	AA	0.0001	0.0005
	122	KUE_C_H	mrMLM	Excalibur_c32472_263	1B	108218026	-0.7722	3.6023	4.33321	17.9869	0.0115	A	0.0639	0.1318
	123	LA_C_2016	mrMLM	wsnp_Ku_c9144_15396815	1B	119099248	-7.5151	3.2304	3.94	25.2207	0.0071	C	6.0176	9.1241
	124	KUE_C_2017	FASTmrMLM	wsnp_Ku_c9144_15396815	1B	119099248	3.5143e-05	11.1886	12.1503	0.0001	0.0056	CC	0	0
	125	GY_C_2017	FASTmrMLM	Excalibur_c20285_376	1B	192278924	-0.5362	3.1103	3.8125	11.2073	0.0955	TC	0.8921	1.2273
	126	GY_C_2017	pLARmEB	Excalibur_c20285_376	1B	192278924	-0.6455	4.6384	5.4195	12.1448	0.0955	TC	0.7511	1.2273
	127	SpL_T_2018	pLARmEB	RAC875_c2341_1450	1B	263560958	-0.3877	4.8871	5.6786	4.4705	0.1629	AA	0.5799	1.4719
	128	KUpE_C_2017	pLARmEB	Kukri_c19641_477	1B	275672539	0.1996	7.2835	8.1562	5.2977	0.4944	NN	0.0103	0.0177
	129	BY_T_2017	mrMLM	Kukri_c19641_477	1B	275672539	5.7686	10.2861	11.2302	49.4641	0.4943	C	0.5311	1.3418
	130	BY_T_2017	FASTmrMLM	Kukri_c19641_477	1B	275672539	5.346	9.7064	10.6385	54.3657	0.4944	NN	0.6519	1.3418
	131	BY_T_2017	pLARmEB	Kukri_c19641_477	1B	275672539	5.4316	10.4819	11.43	57.0164	0.4944	NN	0.6625	1.3418
	132	K_T_2017	mrMLM	Kukri_c19641_477	1B	275672539	117.424	8.603	9.51003	59.4116	0.4943	C	274.224	528.921
	133	K_T_2017	FASTmrMLM	Kukri_c19641_477	1B	275672539	105.296	8.9185	9.833	56.1696	0.4944	NN	289.521	528.921
	134	K_T_2017	pLARmEB	Kukri_c19641_477	1B	275672539	108.378	9.8665	10.802	37.8889	0.4944	NN	271.872	528.921
	135	KUpE_T_2017	mrMLM	Kukri_c19641_477	1B	275672539	1.3047	8.603	9.51003	59.4116	0.4943	C	0.0339	0.0653
	136	KUpE_T_2017	FASTmrMLM	Kukri_c19641_477	1B	275672539	1.1674	8.9185	9.833	56.0832	0.4944	NN	0.0356	0.0653
	137	KUpE_T_2017	pLARmEB	Kukri_c19641_477	1B	275672539	1.1845	10.2276	11.1706	41.2852	0.4944	NN	0.0316	0.0653
	138	K_T_2018	pLARmEB	Kukri_c19641_477	1B	275672539	57.8798	3.3145	4.0291	24.7272	0.4944	NN	389.689	490.225
	139	KUpE_C_2018	pLARmEB	Kukri_c19641_477	1B	275672539	0.0033	3.4625	4.1856	0.0015	0.4944	NN	0.0252	0.0327
	140	KUpE_T_2018	pLARmEB	Kukri_c19641_477	1B	275672539	0.6445	3.776	4.5162	24.7916	0.4944	NN	0.0481	0.0605
	141	SpL_T_2017	pLARmEB	BS00066444_51	1B	278687018	0.204	3.9	4.6466	4.5363	0.1854	GG	0.3041	0.7225
	142	KUtE_T_2018	FASTmrMLM	wsnp_Ex_c17238_25895129	1B	300950124	9.0582e-05	13.7462	14.7505	0.0008	0.0169	GG	0.0001	0.0001
	143	SpL_C_2018	FASTmrMLM	BS00022687_51	1B	344044130	0.5372	4.6465	5.4279	11.8323	0.1292	TT	0.7264	1.2931
	144	FW_T_H	FASTmrMLM	Ra_c11303_359	1B	379383435	0.0002	5.1781	5.9813	0.0007	0.0112	CC	0.0001	0.0003
	145	Chl_C_2018	mrMLM	Excalibur_c4163_176	1B	408641630	2.5219	4.1735	4.93349	34.8575	0.2471	T	9.8525	12.9157
	146	PH_T_2018	pLARmEB	BS00023001_51	1B	488658986	-2.2106	4.8303	5.6195	9.4682	0.4719	AA	33.079	51.2913
	147	SW_T_H	FASTmrMLM	IACX11291	1B	530959722	0.0007	8.9565	9.8719	0.0332	0.3427	AA	0.0003	0.001
	148	CHL_C_2016	pLARmEB	BS00029730_51	1B	543518252	2.0762	3.6653	4.3996	4.1048	0.2945	AA	11.7635	29.6459
	149	HI_C_2017	FASTmrMLM	wsnp_Ku_c34980_44256215	1B	545644564	0.0074	7.6389	8.5214	0.3891	0.118	GG	0.0026	0.0046
	150	CHL_B_C_2017	FASTmrMLM	wsnp_Ex_c5245_9283053	1B	548905092	0.5953	3.0326	3.7299	5.3647	0.4045	TT	5.462	6.3638
	151	CHL_B_C_2017	pLARmEB	wsnp_Ex_c5245_9283053	1B	548905092	0.5663	3.8302	4.5732	2.5856	0.4045	TT	3.2492	6.3638
	152	KUE_T_2018	pLARmEB	wsnp_JD_c6331_7499060	1B	548967983	-0.0002	11.9074	12.882	0.0109	0.0787	TT	0	0.0001
	153	CHL_B_C_2017	mrMLM	wsnp_Ex_c5098_9047611	1B	548971423	1.9955	6.0142	6.84771	20.4768	0.1149	A	4.8903	6.3638
	154	CHL_B_C_2017	FASTmrEMMA	wsnp_Ex_c5098_9047611	1B	548971423	3.0852	4.6236	5.404	13.6806	0.1236	AA	4.2998	6.3638
	155	CHL_B_C_2017	pLARmEB	wsnp_Ex_c5098_9047611	1B	548971423	1.2745	3.6212	4.3531	4.4484	0.1236	AA	3.2492	6.3638
	156	KUtE_T_2018	pLARmEB	Excalibur_c16203_451	1B	555298082	0.0009	6.3853	7.231	0.3424	0.118	TT	0	0.0001
	157	BY_C_2016	pLARmEB	IACX11274	1B	576024228	-0.6713	7.2996	8.1727	12.0131	0.2123	GG	0.9318	2.0545
	158	KUtE_C_2018	pLARmEB	Jagger_c7242_85	1B	581413150	-0.001	3.6526	4.3862	0.4411	0.1517	CC	0	0.0001
	159	KUE_C_2018	pLARmEB	Jagger_c7242_85	1B	581413150	-0.0004	4.317	5.0837	0.1875	0.1517	CC	0	0
	160	TN_C_2018	pLARmEB	BS00022551_51	1B	583446285	0.1831	4.6801	5.463	2.9194	0.3371	CC	0.2965	0.6647
	161	LA_C_2016	mrMLM	BS00034012_51	1B	583983571	-3.214	5.8942	6.72361	25.7277	0.0643	G	6.0176	9.1241
	162	LA_T_2016	mrMLM	BS00034012_51	1B	583983571	-3.2499	6.1218	6.95892	27.185	0.0643	G	4.8203	11.7197
	163	LA_T_2016	FASTmrMLM	BS00034012_51	1B	583983571	-3.1307	4.5521	5.3294	25.5463	0.0694	NN	6.4356	11.7197
	164	LA_T_2016	pLARmEB	BS00034012_51	1B	583983571	-3.1915	6.6136	7.4665	8.639	0.0694	NN	4.3795	11.7197
	165	GpS_C_2016	FASTmrEMMA	BS00066944_51	1B	587048173	-4.1867	3.4697	4.1933	8.1158	0.3562	AA	33.0697	48.0483
	166	KUtE_C_2018	FASTmrMLM	RAC875_c17651_1174	1B	598411205	0.0066	4.0862	4.842	9.0895	0.4607	AG	0.0001	0.0001
	167	FW_T_H	FASTmrMLM	Excalibur_c581_1220	1B	624506208	-0.0004	7.5857	8.4667	0.0518	0.3708	AA	0.0001	0.0003
	168	FW_T_H	FASTmrMLM	Tdurum_contig67656_387	1B	626085427	-0.0014	13.0425	14.0355	0.6522	0.3483	GG	0.0001	0.0003
	169	FW_T_H	FASTmrMLM	BobWhite_c9881_1312	1B	626713811	0.0002	10.3162	11.261	0.0051	0.1517	AA	0.0001	0.0003
	170	FW_C_H	mrMLM	CAP12_c5744_162	1B	632010482	-0.0082	4.631	5.41174	6.1536	0.3908	T	0.0002	0.0005
	171	KUE_C_H	mrMLM	CAP12_c5744_162	1B	632010482	-0.1364	4.631	5.41174	6.1536	0.3908	T	0.0639	0.1318
	172	KUE_C_H	FASTmrMLM	CAP12_c5744_162	1B	632010482	-0.1221	4.8042	5.5923	9.6248	0.3933	TT	0.0867	0.1318
	173	FW_C_H	FASTmrMLM	RAC875_c839_352	1B	632421148	-0.003	5.532	6.3485	1.8301	0.3933	AA	0.0001	0.0005
	174	SpL_C_2017	mrMLM	tplb0043a07_880	1B	637622677	0.284	3.294	4.0074	9.5349	0.4368	A	0.3809	0.8283
	175	SpL_C_2017	FASTmrMLM	tplb0043a07_880	1B	637622677	0.2767	4.5017	5.2768	8.7473	0.427	AA	0.3978	0.8283
	176	SpL_C_2017	FASTmrEMMA	tplb0043a07_880	1B	637622677	0.5616	3.1775	3.8839	9.1026	0.427	AA	0.6359	0.8283
	177	SpL_C_2017	pLARmEB	tplb0043a07_880	1B	637622677	0.3809	6.3611	7.206	12.7622	0.427	AA	0.5281	0.8283
	178	SpS_T_2017	mrMLM	tplb0043a07_880	1B	637622677	0.4263	4.4336	5.20563	5.4654	0.4368	A	0.9289	2.3605
	179	SpS_T_2017	FASTmrMLM	tplb0043a07_880	1B	637622677	0.4101	5.0117	5.8083	7.0159	0.427	AA	0.8788	2.3605
	180	KUtE_C_2018	pLARmEB	BobWhite_c19733_301	1B	641552767	0.0009	10.1841	11.1262	0.5933	0.3315	AA	0	0.0001
	181	FW_C_H	FASTmrMLM	Excalibur_c63885_115	1B	641632818	-0.0013	3.7016	4.4379	0.3072	0.3989	GG	0.0001	0.0005
	182	KUpE_T_H	FASTmrMLM	BS00032076_51	1B	643102037	-0.0948	3.3497	4.0664	2.7885	0.3933	TT	0.2302	0.304
	183	KUtE_T_2017	pLARmEB	wsnp_JD_c14411_14148961	1B	654027306	0.0005	4.7538	5.5398	0.2715	0.4944	AA	0	0.0001
	184	PH_T_2017	mrMLM	RAC875_c3057_2297	1B	658495308	2.9208	4.1156	4.87281	17.1712	0.2011	T	19.2139	34.5645
	185	PH_T_2017	FASTmrMLM	RAC875_c3057_2297	1B	658495308	2.2889	4.2063	4.9678	11.2822	0.2079	TT	18.8529	34.5645
	186	PH_T_2018	FASTmrMLM	RAC875_c3057_2297	1B	658495308	2.8759	4.5353	5.3119	12.0031	0.2079	TT	32.7052	51.2913
	187	FW_T_H	pLARmEB	RAC875_c3057_2297	1B	658495308	0.0004	10.6509	11.6023	0.0293	0.2079	TT	0.0001	0.0003
	188	KUtE_C_2018	pLARmEB	Tdurum_contig29087_628	1B	661633325	0.0005	4.1843	4.9448	0.0977	0.1067	AA	0	0.0001
	189	KUE_C_2018	FASTmrMLM	Tdurum_contig29087_628	1B	661633325	0.0001	11.5226	12.4904	0.0169	0.1067	AA	0	0
	190	GY_C_2016	mrMLM	wsnp_Ra_c53181_56932563	1B	664804242	-1.1265	4.1537	4.91274	50.6135	0.3451	G	0.6098	1.1659
	191	KUtE_T_2017	FASTmrMLM	CAP7_rep_c6352_375	1B	668912357	-0.0003	6.5664	7.4178	0.0195	0.0225	GG	0	0.0001
	192	KUtE_T_2017	pLARmEB	CAP7_rep_c6352_375	1B	668912357	-0.0002	14.7235	15.6536	0.0043	0.0225	GG	0	0.0001
	193	KUE_C_2018	pLARmEB	BobWhite_c11756_79	1B	676776429	0.0004	4.3508	5.1191	0.1758	0.1236	CC	0	0
	194	SW_T_H	FASTmrMLM	BobWhite_c11756_79	1B	676776429	-0.005	3.5998	4.3306	1.0495	0.1236	CC	0.0003	0.001
	195	GY_T_2016	FASTmrMLM	RAC875_c13829_413	1B	677815928	-0.4427	3.1705	3.8765	8.2497	0.411	NN	0.8125	0.9271
	196	DM_C_2017	FASTmrEMMA	RAC875_c2070_566	1D	417149	1.7757	3.2376	3.9476	5.9383	0.3539	AA	7.262	11.0976
	197	DM_T_2017	pLARmEB	RAC875_c2070_566	1D	417149	0.7171	3.5241	4.2507	4.0694	0.3539	AA	3.8877	5.8373
	198	KUtE_C_2017	pLARmEB	BS00063418_51	1D	513174	0.0006	4.1658	4.9254	0.1038	0.0955	CC	0	0.0001
	199	KUE_C_2017	FASTmrMLM	BS00063418_51	1D	513174	0.0005	14.2358	15.2556	0.2704	0.0955	CC	0	0
	200	KUE_C_2017	pLARmEB	BS00063418_51	1D	513174	0.0004	10.5132	11.4619	0.1465	0.0955	CC	0	0
	201	KUE_T_2017	pLARmEB	wsnp_CAP12_c55_32598	1D	2103061	5.7614e-05	13.098	14.0913	0.0004	0.0225	GG	0	0
	202	GY_C_2017	pLARmEB	RAC875_c10925_1887	1D	2224742	0.3992	3.1225	3.8255	1.975	0.1067	GG	0.7511	1.2273
	203	KUE_C_2018	FASTmrMLM	BS00047515_51	1D	2588483	0.0002	13.2485	14.247	0.0253	0.1573	CC	0	0
	204	KUE_C_2018	pLARmEB	BS00047515_51	1D	2588483	0.0002	3.2781	3.9906	0.0219	0.1573	CC	0	0
	205	KUtE_C_2018	pLARmEB	RAC875_rep_c105796_617	1D	7876699	0.0007	6.0728	6.9083	0.3436	0.2697	TT	0	0.0001
	206	KUE_T_2018	FASTmrMLM	BS00110375_51	1D	7897393	-0.0002	3.5646	4.2934	0.0551	0.1124	AA	0	0.0001
	207	KUtE_T_2018	pLARmEB	RAC875_c10387_685	1D	11399886	-0.001	14.6652	15.6536	0.5409	0.3652	AC	0	0.0001
	208	PH_T_2017	pLARmEB	BS00022595_51	1D	38781505	6.8267	3.3094	4.0237	5.7229	0.4888	NN	14.2695	34.5645
	209	RL_C_2018	mrMLM	BS00022595_51	1D	38781505	-17.358	3.2204	3.9294	20.904	0.4885	G	36.3012	86.267
	210	RL_C_2018	FASTmrMLM	BS00022595_51	1D	38781505	-16.9511	5.9458	6.777	20.1882	0.4888	NN	29.9338	86.267
	211	RL_C_2018	pLARmEB	BS00022595_51	1D	38781505	-16.3232	6.8981	7.7596	13.6521	0.4888	NN	22.6434	86.267
	212	GY_T_2017	pLARmEB	BS00011205_51	1D	52345479	-0.195	4.6255	5.406	12.031	0.4551	GG	0.2129	0.3102
	213	KUE_T_2017	pLARmEB	BS00011205_51	1D	52345479	-0.0005	5.734	6.5578	0.6387	0.4551	GG	0	0
	214	KUE_C_2018	pLARmEB	IACX6432	1D	55669135	0.0009	14.0633	15.0515	0.1779	0.4888	NN	0	0
	215	NA_C_H	pLARmEB	RAC875_rep_c69721_835	1D	101942866	-1.6043	3.6579	4.3918	9.7891	0.1966	TT	11.7684	16.5406
	216	Na+_C_H	pLARmEB	RAC875_rep_c69721_835	1D	101942866	-1.6043	3.6579	4.3918	9.7891	0.1966	TT	11.7684	16.5406
	217	KUtE_C_2018	pLARmEB	BS00063860_51	1D	132308500	-0.0024	7.5064	8.3853	0.6332	0.4213	NN	0	0.0001
	218	KUtE_C_2017	FASTmrMLM	Kukri_c32885_145	1D	261741663	-0.001	7.1411	8.0097	0.3856	0.1629	TT	0	0.0001
	219	HI_C_2017	FASTmrMLM	Kukri_c13458_226	1D	336365267	0.0002	7.0105	7.8753	0.0002	0.0562	CC	0.0026	0.0046
	220	RL_C_H	mrMLM	Kukri_c13458_226	1D	336365267	-4.9166	4.2575	5.02145	12.1333	0.046	C	18.0166	33.8137
	221	RL_C_H	FASTmrMLM	Kukri_c13458_226	1D	336365267	-4.1408	4.2575	5.0215	10.6482	0.0562	CC	21.3196	33.8137
	222	RL_C_H	pLARmEB	Kukri_c13458_226	1D	336365267	-4.7783	6.588	7.4401	5.7501	0.0562	CC	19.0034	33.8137
	223	FW_T_H	FASTmrMLM	Kukri_c13458_226	1D	336365267	-0.0007	10.9266	11.8834	0.044	0.0562	CC	0.0001	0.0003
	224	FW_T_H	pLARmEB	Kukri_c13458_226	1D	336365267	-0.0002	6.544	7.3947	0.002	0.0562	CC	0.0001	0.0003
	225	FW_T_H	FASTmrMLM	IAAV4656	1D	357459758	0.0006	9.598	10.5277	0.1259	0.309	CC	0.0001	0.0003
	226	FW_T_H	pLARmEB	IAAV4656	1D	357459758	0.0003	12.8293	13.8211	0.0281	0.309	CC	0.0001	0.0003
	227	KUpE_C_2017	pLARmEB	wsnp_BE517805D_Ta_1_1	1D	392140648	4.808e-05	3.4191	4.1398	5.8453e-06	0.3202	TT	0.0103	0.0177
	228	CHL_B_C_2017	pLARmEB	IAAV9177	1D	433904945	2.3509	4.6353	5.4162	11.6313	0.4663	NN	3.2492	6.3638
	229	FW_T_H	pLARmEB	IAAV9177	1D	433904945	0.0049	12.4814	13.466	1.754	0.4663	NN	0.0001	0.0003
	230	KUtE_C_2018	pLARmEB	BS00022188_51	1D	462203530	0.0002	4.2696	5.0341	0.0082	0.0506	CC	0	0.0001
	231	SpL_T_2017	pLARmEB	Ra_c7324_1464	1D	462488065	0.2091	4.3037	5.0698	6.0121	0.4382	TT	0.3041	0.7225
	232	KUE_T_2018	pLARmEB	BobWhite_c39092_629	1D	470894146	-0.0003	10.2918	11.2361	0.0888	0.2191	CC	0	0.0001
	233	FW_T_H	pLARmEB	BobWhite_c39092_629	1D	470894146	0.0002	4.1978	4.9589	0.0113	0.2191	CC	0.0001	0.0003
	234	KUE_C_2018	pLARmEB	BS00063512_51	1D	485708741	0.0001	6.3312	7.1752	0.0192	0.073	TT	0	0
	235	KUE_T_2018	pLARmEB	RFL_Contig2961_1806	1D	493485518	-0.0004	10.3096	11.2542	0.1715	0.3933	CC	0	0.0001
	236	NA_C_H	mrMLM	BS00018347_51	2A	12469121	-7.1132	5.5672	6.38503	19.787	0.0172	A	6.8329	16.5406
	237	Na+_C_H	mrMLM	BS00018347_51	2A	12469121	-7.1132	5.5672	6.38503	19.787	0.0172	A	6.8329	16.5406
	238	KUE_T_2017	pLARmEB	GENE-1086_1111	2A	12961300	0.0001	13.5332	14.5396	0.0231	0.0674	AA	0	0
	239	KUtE_T_2018	FASTmrMLM	IACX10973	2A	13409094	-0.0002	3.3751	4.0932	0.0024	0.0225	CC	0.0001	0.0001
	240	KUE_T_2018	FASTmrMLM	IACX10973	2A	13409094	-0.0003	12.864	13.8542	0.0216	0.0225	CC	0	0.0001
	241	KUE_T_2018	FASTmrMLM	BS00064706_51	2A	15881910	0.0007	3.3164	4.0311	0.577	0.1461	TT	0	0.0001
	242	KUtE_C_H	mrMLM	BS00065667_51	2A	21207875	-0.4203	3.3592	4.07642	36.9251	0.0402	T	0.0875	0.1004
	243	KUE_T_2018	pLARmEB	BobWhite_c19433_185	2A	30866270	0.0006	11.8667	12.8406	0.3885	0.3427	NN	0	0.0001
	244	FW_T_H	FASTmrMLM	BS00065110_51	2A	31088889	0.0015	11.2545	12.2174	0.1314	0.0506	AA	0.0001	0.0003
	245	RW_T_H	mrMLM	Tdurum_contig560_239	2A	72382644	-0.8838	8.4722	9.37605	38.4622	0.3563	A	0.5649	1.1757
	246	NA_T_H	FASTmrEMMA	Tdurum_contig560_239	2A	72382644	144949	3.136	3.8398	6.7271	0.3539	AA	2.05261e+10	3.19381e+10
	247	NA_T_H	pLARmEB	Tdurum_contig560_239	2A	72382644	113155	5.5461	6.3632	26.0669	0.3539	AA	2.33418e+10	3.19381e+10
	248	Chl_T_2018	pLARmEB	Tdurum_contig93884_223	2A	98124024	3.0448	4.9183	5.7111	11.8573	0.2584	TT	20.5111	35.9326
	249	CHL_21DAG_C_H	pLARmEB	Kukri_c14611_315	2A	150914903	-0.8846	3.6395	4.3724	8.6795	0.3539	GG	6.016	8.0229
	250	CHL_21DAG_T_H	FASTmrMLM	Kukri_c14611_315	2A	150914903	-0.845	3.4379	4.1596	11.5231	0.3539	GG	3.5302	5.307
	251	CHL_21DAG_T_H	pLARmEB	Kukri_c14611_315	2A	150914903	-0.6994	3.416	4.1365	8.2269	0.3539	GG	2.9667	5.307
	252	CHL_14DAG_C_H	mrMLM	Ra_c22724_810	2A	182301716	2.0843	3.352	4.0688	39.9656	0.3678	A	4.7383	6.7055
	253	CHL_14DAG_T_H	FASTmrEMMA	Ra_c22724_810	2A	182301716	1.7758e-05	3.7911	4.5321	3.0258e-10	0.3708	AG	5.8238	7.9209
	254	CHL_21DAG_T_H	mrMLM	Ra_c22724_810	2A	182301716	2.2605	6.7615	7.61892	54.1225	0.3678	A	3.7359	5.307
	255	CHL_21DAG_C_H	FASTmrMLM	wsnp_Ex_c25409_34677674	2A	192507669	-1.326e-05	3.0001	3.6954	2.0453e-09	0.3427	TT	7.9323	8.0229
	256	Na+_C_2018	pLARmEB	CAP12_c1437_261	2A	276276620	-7.7358	4.7952	5.5829	8.6967	0.309	AA	269.54	509.913
	257	RL_T_2017	mrMLM	wsnp_Ex_c3232_5960344	2A	284611591	-3.986	3.1133	3.81573	13.0992	0.3521	G	57.1283	107.424
	258	RL_T_2017	FASTmrMLM	wsnp_Ex_c3232_5960344	2A	284611591	-2.9547	3.5546	4.2829	7.6863	0.3425	GG	66.0556	107.424
	259	CHL_14DAG_T_H	mrMLM	Ra_c37220_262	2A	459506393	2.4047	4.0392	4.7927	41.3933	0.4195	A	6.0942	7.9209
	260	PH_T_2016	pLARmEB	Kukri_c57491_132	2A	502335158	-7.3626	7.9118	8.8015	22.3701	0.1575	GG	62.1009	108.48
	261	KUtE_C_2017	pLARmEB	RFL_Contig852_4295	2A	553276150	0.0004	4.9617	5.7563	0.0389	0.0955	CC	0	0.0001
	262	BY_T_2016	FASTmrMLM	Excalibur_c1793_97	2A	558953000	-0.7638	6.1168	6.9538	18.1799	0.2466	AA	2.2092	2.7023
	263	BY_T_2016	pLARmEB	Excalibur_c1793_97	2A	558953000	-0.8333	4.4306	5.2025	17.7015	0.2466	AA	1.886	2.7023
	264	SpS_T_2017	FASTmrMLM	BS00040337_51	2A	562509673	0.3239	3.5506	4.2787	3.0976	0.2247	AA	0.8788	2.3605
	265	GpS_C_2017	mrMLM	wsnp_BE406351A_Ta_2_2	2A	562602535	2.9035	3.1326	3.83623	15.6505	0.2701	T	39.1892	44.9544
	266	GpS_C_2017	FASTmrMLM	wsnp_BE406351A_Ta_2_2	2A	562602535	2.2516	3.5948	4.3253	8.5063	0.264	TT	34.4162	44.9544
	267	HI_T_2016	FASTmrMLM	wsnp_CAP11_rep_c8469_3658252	2A	570002495	4.032	3.388	4.1069	5.7816	0.1575	GG	85.0659	142.625
	268	HI_T_2016	pLARmEB	wsnp_CAP11_rep_c8469_3658252	2A	570002495	5.2218	6.6507	7.5047	10.5043	0.1575	GG	50.1635	142.625
	269	BY_T_2016	mrMLM	GENE-1264_25	2A	573378800	-1.6928	3.9534	4.70264	14.4577	0.0352	G	2.0816	2.7023
	270	FW_T_H	FASTmrMLM	BS00026377_51	2A	576657262	0.0003	5.1793	5.9825	0.0049	0.0281	AA	0.0001	0.0003
	271	KUE_T_2018	pLARmEB	IAAV80	2A	603687063	-0.0003	11.3596	12.3245	0.0709	0.1292	AA	0	0.0001
	272	KUtE_C_2018	pLARmEB	BS00062679_51	2A	615287757	0.0002	9.4924	10.4198	0.0101	0.0506	GG	0	0.0001
	273	SL_T_H	mrMLM	Excalibur_c74376_158	2A	631640920	-3.5212	7.5488	8.42884	33.0074	0.0517	T	4.0911	8.3768
	274	SL_T_H	pLARmEB	Excalibur_c74376_158	2A	631640920	-3.1397	5.1791	5.9823	14.5727	0.0506	TT	4.7007	8.3768
	275	KUtE_C_2017	pLARmEB	wsnp_Ex_rep_c102385_87568304	2A	694954205	-0.0027	3.8296	4.5726	4.8976	0.2247	TC	0	0.0001
	276	KUtE_T_2017	FASTmrMLM	wsnp_Ex_rep_c102385_87568304	2A	694954205	-0.0006	4.4387	5.211	0.4747	0.2247	TC	0	0.0001
	277	KUtE_T_2017	FASTmrMLM	Ra_c26702_797	2A	701482423	-8.0565e-05	6.2571	7.0987	0.0004	0.0056	CC	0	0.0001
	278	SpS_T_2017	FASTmrMLM	wsnp_Ex_c21709_30869795	2A	703875478	0.5449	4.5734	5.3516	7.0511	0.1461	TT	0.8788	2.3605
	279	PH_C_2018	FASTmrEMMA	RAC875_rep_c108548_163	2A	709837034	7.2628	4.5922	5.3712	12.4936	0.382	AG	34.2651	45.1192
	280	Na+_T_2018	FASTmrMLM	Excalibur_c65910_246	2A	712308171	-39.0255	3.0467	3.7449	27.2141	0.4888	TC	288.182	424.758
	281	Na+_T_2018	pLARmEB	Excalibur_c65910_246	2A	712308171	-55.8473	5.561	6.3786	41.6631	0.4888	TC	302.626	424.758
	282	FW_T_H	FASTmrMLM	Excalibur_c25380_113	2A	713197623	0.0011	6.1418	6.9796	0.0539	0.0337	GG	0.0001	0.0003
	283	CHL_C_2016	pLARmEB	BS00092550_51	2A	715413487	2.1653	3.6919	4.4276	2.4572	0.1301	GG	11.7635	29.6459
	284	HI_T_2016	mrMLM	BS00080752_51	2A	718355388	-5.4511	3.6278	4.36009	13.01	0.1901	G	67.8796	142.625
	285	HI_T_2016	pLARmEB	BS00080752_51	2A	718355388	-3.4498	4.3789	5.1485	6.2006	0.1849	GG	50.1635	142.625
	286	TN_C_2017	FASTmrMLM	wsnp_Ra_c3378_6318431	2A	723525913	0.1837	4.6351	5.416	8.2426	0.2022	CC	0.1409	0.2951
	287	KUE_C_2017	FASTmrMLM	wsnp_Ra_c3378_6318431	2A	723525913	0.0001	5.5178	6.3338	0.0291	0.2022	CC	0	0
	288	KUE_C_2017	FASTmrMLM	BS00057060_51	2A	729288358	-0.0004	8.1924	9.0893	0.4007	0.4494	AA	0	0
	289	Zn_T_2017	FASTmrMLM	Kukri_c15340_1087	2A	732569699	5.1445	3.3413	4.0575	11.5581	0.4888	NN	20.1347	30.0386
	290	RL_C_2018	pLARmEB	Tdurum_contig10574_864	2A	732585393	4.5327	8.5275	9.4327	4.7794	0.1067	AA	22.6434	86.267
	291	RL_T_H	mrMLM	BS00023048_51	2A	734256837	-2.2111	4.0464	4.80025	12.3911	0.3793	T	23.6386	35.6113
	292	RL_T_H	pLARmEB	BS00023048_51	2A	734256837	-1.3014	3.3931	4.1123	4.0985	0.3708	TT	17.0923	35.6113
	293	RW_T_H	mrMLM	BS00023048_51	2A	734256837	0.3468	3.0401	3.73792	6.0722	0.3793	T	0.5649	1.1757
	294	RW_T_H	FASTmrEMMA	BS00023048_51	2A	734256837	0.6446	3.3423	4.0585	7.2536	0.3708	TT	0.8812	1.1757
	295	RL_T_H	FASTmrMLM	Excalibur_c26462_452	2A	734257257	-1.5842	3.5316	4.2586	6.246	0.3202	TT	17.5446	35.6113
	296	GpS_C_2017	FASTmrEMMA	Kukri_c34983_190	2A	740010373	5.4584	3.1394	3.8435	8.0575	0.4551	TC	39.536	44.9544
	297	RL_C_2018	mrMLM	wsnp_Ex_c5740_10081171	2A	740848305	-4.089	6.4758	7.32439	12.3199	0.3621	A	36.3012	86.267
	298	KUE_T_2018	pLARmEB	BS00010098_51	2A	743096823	-0.0005	8.8859	9.7996	0.2499	0.1629	GG	0	0.0001
	299	FW_T_H	FASTmrMLM	BS00023144_51	2A	744329367	0.0005	8.5156	9.4205	0.0999	0.2921	TC	0.0001	0.0003
	300	FW_T_H	pLARmEB	BS00023144_51	2A	744329367	0.0002	8.9033	9.8174	0.0141	0.2921	TC	0.0001	0.0003
	301	SpS_C_2017	pLARmEB	Excalibur_c4372_363	2A	758396872	-0.4269	3.4224	4.1433	6.6788	0.3539	GG	1.3884	2.6043
	302	SW_T_H	FASTmrMLM	Tdurum_contig56321_232	2A	758514679	-0.0004	6.7909	7.6492	0.0145	0.3146	CC	0.0003	0.001
	303	KUE_T_2018	FASTmrMLM	wsnp_Ex_c3695_6740063	2A	759830040	0.0003	4.2744	5.0391	0.0665	0.1124	CC	0	0.0001
	304	PH_C_2016	FASTmrMLM	Tdurum_contig52350_636	2A	759830158	6.8653	4.2877	5.0531	23.5869	0.4795	TC	32.9174	58.7275
	305	PH_C_2016	pLARmEB	Tdurum_contig52350_636	2A	759830158	6.384	3.424	4.145	20.9406	0.4795	TC	38.1554	58.7275
	306	KUE_T_2018	FASTmrMLM	Tdurum_contig52350_636	2A	759830158	-0.0008	5.0893	5.889	0.3672	0.4831	TC	0	0.0001
	307	KUE_T_2018	pLARmEB	Tdurum_contig52350_636	2A	759830158	-0.0013	5.9596	6.7913	0.9452	0.4831	TC	0	0.0001
	308	KUpE_C_2017	pLARmEB	Ex_c6937_1992	2A	761540385	-0.0179	5.5504	6.3676	0.7734	0.2191	TT	0.0103	0.0177
	309	SpL_T_2017	pLARmEB	BS00083623_51	2A	762290646	-1.2033	3.2926	4.0059	8.9056	0.4944	NN	0.3041	0.7225
	310	KUtE_C_2018	FASTmrMLM	BS00083623_51	2A	762290646	0.0286	6.8727	7.7335	26.3979	0.4944	NN	0.0001	0.0001
	311	SW_C_H	pLARmEB	RAC875_c24364_391	2A	762291492	0.0139	3.1159	3.8185	1.0785	0.4607	CC	0.0004	0.0007
	312	SL_T_H	FASTmrMLM	Excalibur_c28710_340	2A	762623617	1.8778	4.1298	4.8877	13.775	0.1124	CC	5.9568	8.3768
	313	SL_T_H	FASTmrEMMA	Excalibur_c28710_340	2A	762623617	2.688	3.1076	3.8097	7.6331	0.1124	CC	6.1697	8.3768
	314	RL_T_2017	pLARmEB	CAP8_c5840_208	2A	763695509	5.5563	3.7185	4.4557	4.5588	0.0822	TT	59.5647	107.424
	315	CHL_H_T_2017	pLARmEB	BobWhite_c11479_157	2A	764657398	0.57	3.1857	3.8926	1.41	0.3989	GG	1.6805	3.2157
	316	TN_T_2017	mrMLM	BobWhite_c11479_157	2A	764657398	0.201	7.1016	7.96908	12.4786	0.3908	G	0.0302	0.0817
	317	TN_T_2017	FASTmrMLM	BobWhite_c11479_157	2A	764657398	0.1711	7.867	8.7555	10.2872	0.3989	GG	0.037	0.0817
	318	TN_T_2017	FASTmrEMMA	BobWhite_c11479_157	2A	764657398	0.2136	3.037	3.7346	4.7613	0.3989	GG	0.061	0.0817
	319	TN_T_2017	pLARmEB	BobWhite_c11479_157	2A	764657398	0.183	10.7292	11.6821	7.3071	0.3989	GG	0.0421	0.0817
	320	BY_T_2017	mrMLM	BobWhite_c11479_157	2A	764657398	0.681	4.757	5.54312	5.0769	0.3908	G	0.5311	1.3418
	321	BY_T_2017	FASTmrMLM	BobWhite_c11479_157	2A	764657398	0.6246	5.7047	6.5275	5.4649	0.3989	GG	0.6519	1.3418
	322	BY_T_2017	pLARmEB	BobWhite_c11479_157	2A	764657398	0.5334	5.0112	5.8078	4.0491	0.3989	GG	0.6625	1.3418
	323	KUE_T_2017	FASTmrMLM	BobWhite_c11479_157	2A	764657398	0.0014	3.9038	4.6505	1.5595	0.3989	GG	0	0
	324	KUE_T_2017	pLARmEB	BobWhite_c11479_157	2A	764657398	0.0016	9.52	10.448	2.0228	0.3989	GG	0	0
	325	PH_C_2018	mrMLM	wsnp_JD_c16948_15934352	2A	765708669	2.3904	3.0358	3.73335	11.2321	0.4138	C	30.7549	45.1192
	326	FW_C_H	FASTmrMLM	RAC875_rep_c69411_672	2A	766396323	-0.0003	6.4092	7.2557	0.0045	0.0281	GG	0.0001	0.0005
	327	KUE_T_2017	pLARmEB	Tdurum_contig45196_487	2A	770411323	0.0007	7.6835	8.5672	0.8085	0.4101	AG	0	0
	328	GY_T_2017	pLARmEB	wsnp_Ex_rep_c108004_91402649	2A	771236962	0.2169	4.0085	4.7605	5.448	0.2416	AA	0.2129	0.3102
	329	FW_C_H	mrMLM	Tdurum_contig21786_270	2A	773220617	-0.0233	3.068	3.76759	16.9912	0.046	T	0.0002	0.0005
	330	KUE_C_H	mrMLM	Tdurum_contig21786_270	2A	773220617	-0.3889	3.068	3.76759	16.9912	0.046	T	0.0639	0.1318
	331	KUtE_T_2017	pLARmEB	Ex_c72358_240	2A	773710553	-0.0001	6.5154	7.3652	0.002	0.0169	AA	0	0.0001
	332	RL_C_2018	FASTmrMLM	BS00107857_51	2A	774855770	2.9609	5.0317	5.8291	6.9667	0.3315	AA	29.9338	86.267
	333	RL_C_2018	pLARmEB	BS00107857_51	2A	774855770	2.641	5.0606	5.8592	4.0421	0.3315	AA	22.6434	86.267
	334	KUE_T_2018	pLARmEB	BS00044332_51	2B	2109772	0.0003	11.6191	12.5887	0.1078	0.4326	CC	0	0.0001
	335	FW_T_H	pLARmEB	wsnp_Ra_c1501_2991585	2B	6338084	0.0004	7.5875	8.4686	0.0436	0.4438	AA	0.0001	0.0003
	336	HI_C_2017	FASTmrMLM	Excalibur_c42248_663	2B	6715690	5.4162e-05	6.2904	7.1331	6.351e-05	0.4831	GG	0.0026	0.0046
	337	KUE_T_2017	pLARmEB	BS00065927_51	2B	8344509	0.0002	5.2163	6.021	0.1171	0.1742	TT	0	0
	338	Zn_C_2017	FASTmrEMMA	BS00077463_51	2B	13758021	7.8879e-05	3.0344	3.7319	1.866e-09	0.4101	TT	75.1258	75.9797
	339	KUE_C_2017	pLARmEB	Excalibur_c1787_1037	2B	16827640	-0.0004	7.3134	8.1869	0.3228	0.4831	AA	0	0
	340	GY_T_2017	mrMLM	Tdurum_contig44328_68	2B	17778939	0.4052	3.3494	4.06605	35.8423	0.2586	T	0.202	0.3102
	341	GY_T_2017	FASTmrMLM	Tdurum_contig44328_68	2B	17778939	0.2476	3.2767	3.9891	13.8399	0.2528	TT	0.2076	0.3102
	342	GY_T_2016	pLARmEB	RAC875_c4587_905	2B	23123986	-0.6308	3.1455	3.8499	30.6314	0.3288	CC	0.6379	0.9271
	343	SW_T_H	FASTmrMLM	BS00109330_51	2B	24264552	0.0017	6.5809	7.4328	0.2801	0.3483	GG	0.0003	0.001
	344	CHL_T_C_2017	pLARmEB	BS00099658_51	2B	24913476	-1.2873	3.013	3.7091	14.8858	0.0899	TT	4.3086	5.6834
	345	SpS_T_2017	pLARmEB	Kukri_rep_c103530_251	2B	27088810	0.5276	4.1364	4.8946	7.1185	0.1573	CC	1.0983	2.3605
	346	KUE_T_2017	pLARmEB	Kukri_rep_c103530_251	2B	27088810	0.0003	13.473	14.4775	0.114	0.1573	CC	0	0
	347	CHL_H_T_2017	FASTmrMLM	BS00109268_51	2B	32064848	-0.8417	3.0481	3.7464	19.6558	0.2584	AA	2.8958	3.2157
	348	CHL_H_T_2017	pLARmEB	BS00109268_51	2B	32064848	-0.9367	4.0993	4.8557	11.6347	0.2584	AA	1.6805	3.2157
	349	TKW_C_2017	pLARmEB	BS00076982_51	2B	32871648	-1.3349	3.3686	4.0864	3.108	0.4551	TC	11.4398	17.2414
	350	RL_T_H	FASTmrMLM	GENE-0592_268	2B	35284538	-5.2559	6.017	6.8506	25.2548	0.4831	AC	17.5446	35.6113
	351	RL_T_H	pLARmEB	GENE-0592_268	2B	35284538	-5.9022	7.8078	8.6948	31.3196	0.4831	AC	17.0923	35.6113
	352	RW_T_H	pLARmEB	GENE-0592_268	2B	35284538	1.1338	9.3304	10.2543	27.9302	0.4831	AC	0.4896	1.1757
	353	NA_T_H	mrMLM	GENE-0592_268	2B	35284538	-170729	5.2352	6.04059	26.1974	0.4828	A	1.47395e+10	3.19381e+10
	354	NA_T_H	FASTmrMLM	GENE-0592_268	2B	35284538	-144963	5.2352	6.0406	22.1182	0.4831	AC	1.83575e+10	3.19381e+10
	355	CHL_21DAG_T_H	FASTmrMLM	GENE-0592_127	2B	35284667	-2.2015	6.279	7.1213	27.4275	0.4888	AG	3.5302	5.307
	356	CHL_21DAG_T_H	pLARmEB	GENE-0592_127	2B	35284667	-2.2711	6.5561	7.4072	30.4155	0.4888	AG	2.9667	5.307
	357	K_T_2018	pLARmEB	BS00022950_51	2B	44405003	-9.2978	3.34	4.0561	7.6136	0.1348	CC	389.689	490.225
	358	KUpE_T_2018	pLARmEB	BS00022950_51	2B	44405003	-0.1035	3.5	4.2253	7.6314	0.1348	CC	0.0481	0.0605
	359	Chl_C_2018	mrMLM	BS00093755_51	2B	44424386	-1.4392	7.2267	8.09777	10.9731	0.431	C	9.8525	12.9157
	360	Chl_C_2018	pLARmEB	BS00093755_51	2B	44424386	-1.1843	4.6403	5.4214	9.3836	0.4438	CC	8.0584	12.9157
	361	Chl_C_2018	FASTmrMLM	Tdurum_contig11379_1047	2B	46090653	-1.3496	5.6739	6.4956	11.5571	0.4551	CC	7.608	12.9157
	362	Na+_T_2018	mrMLM	Ku_c16479_555	2B	54778923	35.0354	3.7023	4.43859	12.6175	0.0115	C	317.131	424.758
	363	CHL_21DAG_C_H	pLARmEB	Tdurum_contig6194_931	2B	65113741	1.4007	3.4781	4.2021	20.8414	0.236	AA	6.016	8.0229
	364	KUtE_C_2017	pLARmEB	Kukri_rep_c107572_121	2B	68365389	-0.0005	5.1261	5.9272	0.0849	0.1124	CC	0	0.0001
	365	KUE_T_2018	pLARmEB	Tdurum_contig94176_65	2B	71292465	0.001	12.3145	13.2966	1.6183	0.4831	GG	0	0.0001
	366	FW_T_H	pLARmEB	BS00071690_51	2B	105375830	-0.0013	5.9373	6.7682	0.2908	0.1461	AA	0.0001	0.0003
	367	SpL_C_2018	FASTmrEMMA	BS00022944_51	2B	140775198	1.1355	4.2921	5.0576	9.2268	0.1067	GG	0.8729	1.2931
	368	FW_T_H	FASTmrMLM	Kukri_c67546_279	2B	140777196	-0.0018	4.8206	5.6094	0.4706	0.0843	GG	0.0001	0.0003
	369	KUtE_C_H	pLARmEB	Ra_c5609_231	2B	157693530	-0.1317	3.1721	3.8782	6.3467	0.1067	GG	0.0824	0.1004
	370	HI_T_2016	pLARmEB	wsnp_Ex_c30_66389	2B	157694499	2.8838	3.8727	4.6179	2.521	0.3425	TT	50.1635	142.625
	371	KUE_T_2017	pLARmEB	Excalibur_c23723_141	2B	161409209	-0.0003	12.1433	13.1221	0.0576	0.0787	TT	0	0
	372	KUE_T_2017	pLARmEB	BobWhite_c948_52	2B	180616389	0.0004	6.8388	7.6985	0.4974	0.4607	GG	0	0
	373	SpL_C_2018	FASTmrMLM	BobWhite_c948_52	2B	180616389	-0.354	5.011	5.8076	9.6919	0.4607	GG	0.7264	1.2931
	374	SpL_C_2018	pLARmEB	BobWhite_c948_52	2B	180616389	-0.2842	5.2065	6.0108	3.8452	0.4607	GG	0.3848	1.2931
	375	SW_T_H	FASTmrMLM	wsnp_CAP7_c402_217331	2B	180616536	0.0002	3.3262	4.0415	0.0024	0.4663	CC	0.0003	0.001
	376	KUtE_C_2017	pLARmEB	wsnp_Ku_c2562_4879681	2B	190225573	-0.001	14.1701	15.1764	0.7146	0.4888	GG	0	0.0001
	377	KUE_C_2017	FASTmrMLM	wsnp_Ku_c2562_4879681	2B	190225573	-0.0006	12.5872	13.5744	0.9159	0.4888	GG	0	0
	378	KUE_C_2017	pLARmEB	wsnp_Ku_c2562_4879681	2B	190225573	-0.0001	9.685	10.6166	0.0351	0.4888	GG	0	0
	379	SW_C_H	FASTmrMLM	wsnp_Ra_c2842_5399988	2B	202917263	-0.0004	5.1509	5.953	0.0023	0.0337	CC	0.0004	0.0007
	380	KUtE_C_2017	FASTmrMLM	Kukri_c32980_680	2B	202917573	-0.0012	4.9776	5.7728	0.7718	0.264	CC	0	0.0001
	381	KUE_C_2017	FASTmrMLM	Kukri_c32980_680	2B	202917573	-0.0002	13.0384	14.0303	0.11	0.264	CC	0	0
	382	KUtE_T_2018	FASTmrMLM	BS00078506_51	2B	210842836	4.6187e-05	7.0395	7.9052	0.0002	0.0169	TT	0.0001	0.0001
	383	KUE_C_2017	pLARmEB	Excalibur_c12278_1301	2B	246068638	-0.0007	14.93	15.9546	1.28	0.4719	GG	0	0
	384	KUtE_C_2017	pLARmEB	Tdurum_contig17697_675	2B	369804879	0.0006	3.9988	4.7503	0.1575	0.1966	CC	0	0.0001
	385	PH_T_2016	mrMLM	Excalibur_c29707_318	2B	412662241	-4.3806	3.8119	4.55394	12.2066	0.4859	C	64.3809	108.48
	386	KUE_C_2017	FASTmrMLM	Ex_c7628_2392	2B	412665461	0.0003	11.3216	12.2857	0.2383	0.1461	CC	0	0
	387	KUE_T_2017	pLARmEB	BS00066545_51	2B	452811270	0.0002	6.3656	7.2107	0.0936	0.236	GG	0	0
	388	SW_T_H	FASTmrMLM	Ra_c21042_617	2B	456025580	-0.0001	14.5616	15.6536	0.0009	0.1461	AA	0.0003	0.001
	389	SW_T_H	FASTmrMLM	BobWhite_c7326_70	2B	456172645	-0.0006	13.8992	14.9132	0.0197	0.1404	TT	0.0003	0.001
	390	KUtE_C_2017	pLARmEB	Excalibur_c99477_90	2B	456176969	0.0002	6.5944	7.4467	0.0115	0.118	CC	0	0.0001
	391	KUE_C_2017	FASTmrMLM	Excalibur_c99477_90	2B	456176969	1.4829e-05	5.641	6.4615	0.0003	0.118	CC	0	0
	392	HI_C_2017	FASTmrMLM	BobWhite_c40428_349	2B	462936127	0.0001	5.0552	5.8535	0.0004	0.2697	TT	0.0026	0.0046
	393	SW_T_H	FASTmrMLM	Excalibur_c6651_111	2B	462949486	0.001	3.7193	4.4565	0.0299	0.0843	TT	0.0003	0.001
	394	KUE_C_2017	FASTmrMLM	BS00064698_51	2B	467489872	-0.0004	11.4858	12.453	0.2067	0.0899	AA	0	0
	395	KUtE_T_2018	FASTmrMLM	Tdurum_contig61682_187	2B	476407676	-0.0003	9.4536	10.3802	0.0295	0.1124	AA	0.0001	0.0001
	396	KUE_C_2017	FASTmrMLM	Tdurum_contig11172_443	2B	476563328	-4.6625e-05	4.2284	4.991	0.0032	0.1461	GG	0	0
	397	KUtE_T_2017	FASTmrMLM	BobWhite_rep_c65190_72	2B	513497425	-0.0004	4.476	5.2499	0.0484	0.0506	GG	0	0.0001
	398	PH_T_2017	FASTmrMLM	BS00091068_51	2B	593658736	2.4598	3.494	4.2189	6.3648	0.0955	CC	18.8529	34.5645
	399	KUE_C_2018	FASTmrMLM	wsnp_Ex_c10838_17631243	2B	598971364	-0.0001	5.4738	6.2882	0.007	0.0337	CC	0	0
	400	KUtE_T_2017	FASTmrMLM	Ex_c2510_477	2B	612066212	0.0003	5.0409	5.8387	0.038	0.073	GG	0	0.0001
	401	KUtE_T_2017	FASTmrMLM	Tdurum_contig31911_195	2B	646417390	0.0003	5.3904	6.2017	0.0355	0.0674	GG	0	0.0001
	402	KUtE_T_2017	pLARmEB	wsnp_JD_c11975_12326445	2B	646958919	0.0004	3.958	4.7075	0.0595	0.073	GG	0	0.0001
	403	CHL_T_C_2017	pLARmEB	wsnp_Ex_c2445_4573233	2B	647317186	1.1288	3.0469	3.7452	8.6106	0.0843	TT	4.3086	5.6834
	404	K_T_2017	pLARmEB	wsnp_BG274584B_Ta_2_1	2B	657791519	-16.88	3.2494	3.9601	1.8174	0.0225	CC	271.872	528.921
	405	KUpE_T_2017	pLARmEB	wsnp_BG274584B_Ta_2_1	2B	657791519	-0.1781	3.1515	3.8563	1.8451	0.0225	CC	0.0316	0.0653
	406	SW_T_H	FASTmrMLM	Tdurum_contig96648_102	2B	694055722	0.0066	5.7151	6.5382	2.9878	0.3989	TT	0.0003	0.001
	407	SpS_C_2017	mrMLM	BS00046164_51	2B	697510323	-0.8897	5.5186	6.33465	28.0827	0.3621	A	1.9531	2.6043
	408	SpS_C_2017	FASTmrEMMA	BS00046164_51	2B	697510323	-1.5022	5.3998	6.2115	17.6234	0.3539	AA	1.8631	2.6043
	409	SpS_T_2017	FASTmrMLM	BS00046164_51	2B	697510323	-0.5232	5.736	6.5599	11.1753	0.3539	AA	0.8788	2.3605
	410	SpS_T_2017	FASTmrEMMA	BS00046164_51	2B	697510323	-1.2132	3.9794	4.73	12.6826	0.3539	AA	1.6383	2.3605
	411	SpS_T_2017	pLARmEB	BS00046164_51	2B	697510323	-0.6178	6.4351	7.2824	15.215	0.3539	AA	1.0983	2.3605
	412	KUtE_T_2017	pLARmEB	BS00046165_51	2B	697510334	0.0004	10.6009	11.5513	0.1923	0.3483	CC	0	0.0001
	413	SpL_C_2018	pLARmEB	BobWhite_c2521_117	2B	699106259	0.5409	7.0398	7.9055	11.5237	0.3764	AG	0.3848	1.2931
	414	GY_T_2017	FASTmrMLM	wsnp_Ex_c9025_15039930	2B	700208572	0.3116	4.3358	5.1034	20.9305	0.2022	GG	0.2076	0.3102
	415	DM_T_2018	mrMLM	Tdurum_contig29246_118	2B	700741357	-3.7083	4.8815	5.67281	31.3061	0.454	C	12.533	18.4308
	416	DM_T_2018	FASTmrMLM	Tdurum_contig29246_118	2B	700741357	-3.4888	6.5778	7.4296	30.4727	0.4551	TC	10.3267	18.4308
	417	DM_T_2018	pLARmEB	Tdurum_contig29246_118	2B	700741357	-3.6265	8.0427	8.9358	16.3919	0.4551	TC	8.5267	18.4308
	418	KUtE_T_2018	pLARmEB	Excalibur_c60964_203	2B	708436706	-0.0002	3.3212	4.0362	0.0057	0.0281	CC	0	0.0001
	419	KUE_T_2018	pLARmEB	Excalibur_c60964_203	2B	708436706	-0.0003	13.7693	14.7785	0.0132	0.0281	CC	0	0.0001
	420	KUtE_C_2018	pLARmEB	Tdurum_contig12660_192	2B	719803663	-0.0003	13.9288	14.9546	0.0776	0.4607	CC	0	0.0001
	421	FW_C_H	FASTmrMLM	BobWhite_c26329_71	2B	725961243	0.0004	6.0673	6.9026	0.0074	0.0337	GG	0.0001	0.0005
	422	RL_C_2018	FASTmrMLM	BS00064721_51	2B	731536404	3.7598	3.8965	4.6429	4.5094	0.0843	GG	29.9338	86.267
	423	BY_T_2018	mrMLM	BobWhite_c13295_69	2B	741860195	-2.532	3.8559	4.60021	33.613	0.0345	C	2.1657	2.9564
	424	KUtE_C_2017	pLARmEB	RAC875_c26697_589	2B	743736791	-0.0001	6.8145	7.6735	0.0058	0.2865	TC	0	0.0001
	425	HI_C_2017	FASTmrMLM	RAC875_c98387_130	2B	766233839	5.6954e-05	14.9981	15.9546	5.7327e-05	0.2697	CC	0.0026	0.0046
	426	HI_C_2017	FASTmrMLM	Kukri_c34553_188	2B	766234416	4.576e-05	3.7914	4.5324	4.2744e-05	0.3258	AA	0.0026	0.0046
	427	SpL_T_2018	pLARmEB	Kukri_c34553_188	2B	766234416	0.2796	4.0531	4.8073	4.0926	0.3258	AA	0.5799	1.4719
	428	Fe_T_2017	FASTmrEMMA	RAC875_c37540_565	2B	769072314	4.1897	3.1716	3.8776	7.6997	0.382	AA	37.3994	46.1376
	429	SpL_T_2018	pLARmEB	BS00064836_51	2B	774831016	-0.3882	7.2374	8.1088	6.4777	0.3989	GG	0.5799	1.4719
	430	KUtE_C_2017	pLARmEB	Ex_c5327_1731	2B	776977952	0.0003	6.4747	7.3233	0.0095	0.0393	AA	0	0.0001
	431	KUE_C_2017	pLARmEB	Excalibur_c26527_178	2B	777143613	0.0002	14.6792	15.6536	0.033	0.0506	GG	0	0
	432	KUtE_C_2017	pLARmEB	BS00022478_51	2B	783226928	-0.0008	6.2402	7.0812	0.4503	0.4438	GG	0	0.0001
	433	KUtE_T_2017	FASTmrMLM	IAAV8940	2B	783227042	0.0008	3.4231	4.144	0.279	0.0955	GG	0	0.0001
	434	KUE_C_H	FASTmrMLM	BS00067878_51	2B	784621033	0.1992	5.9462	6.7774	18.5397	0.4607	AG	0.0867	0.1318
	435	FW_T_H	FASTmrMLM	BS00056645_51	2B	793148630	-0.0007	11.6648	12.6353	0.0487	0.0843	TT	0.0001	0.0003
	436	KUtE_C_2018	pLARmEB	IAAV690	2B	793583373	-0.0009	3.2837	3.9965	0.1537	0.4719	NN	0	0.0001
	437	SpL_T_2018	mrMLM	Kukri_c16621_417	2B	798213295	0.9775	3.403	4.12275	41.2756	0.3333	T	1.2342	1.4719
	438	SpL_T_2018	FASTmrMLM	Kukri_c16621_417	2B	798213295	0.7606	3.3715	4.0894	29.2198	0.3315	NN	1.2724	1.4719
	439	SpL_T_2018	pLARmEB	Kukri_c16621_417	2B	798213295	0.5546	3.9068	4.6537	15.6596	0.3315	NN	0.5799	1.4719
	440	KUE_T_2018	pLARmEB	GENE-0676_322	2B	801222392	0.001	9.1561	10.076	1.1815	0.2079	GG	0	0.0001
	441	TN_C_2018	mrMLM	Kukri_c19266_779	2D	2470497	-0.3484	3.4878	4.21237	11.786	0.3333	A	0.4569	0.6647
	442	TN_C_2018	FASTmrMLM	Kukri_c19266_779	2D	2470497	-0.2591	3.1523	3.8571	7.9152	0.3371	AA	0.4063	0.6647
	443	TN_C_2018	pLARmEB	Kukri_c19266_779	2D	2470497	-0.2869	5.5384	6.3552	7.545	0.3371	AA	0.2965	0.6647
	444	FW_T_H	FASTmrMLM	RAC875_c5577_1682	2D	6636121	-0.0007	8.3015	9.2011	0.0278	0.0393	CC	0.0001	0.0003
	445	FW_T_H	pLARmEB	RAC875_c5577_1682	2D	6636121	-0.0002	10.5025	11.451	0.0016	0.0393	CC	0.0001	0.0003
	446	SW_T_H	FASTmrMLM	RAC875_c5577_1682	2D	6636121	-0.0015	6.4084	7.2549	0.0403	0.0393	CC	0.0003	0.001
	447	LA_T_H	FASTmrMLM	RAC875_c5577_1682	2D	6636121	-0.5492	3.0649	3.7643	10.0843	0.0393	CC	0.4506	0.5136
	448	KUE_T_2018	FASTmrMLM	wsnp_Ex_rep_c80588_75758453	2D	8717230	0.0002	13.3665	14.3635	0.0318	0.0562	GG	0	0.0001
	449	FW_T_H	pLARmEB	CAP8_c6474_94	2D	11460138	3.6852e-05	6.2124	7.0525	5.1928e-05	0.0225	TT	0.0001	0.0003
	450	RL_C_H	pLARmEB	BS00049876_51	2D	12891888	8.8902	3.7474	4.4861	6.9546	0.4888	AC	19.0034	33.8137
	451	KUE_C_2017	FASTmrMLM	BobWhite_c15073_502	2D	14395525	0.0004	13.39	14.3864	0.1696	0.073	CC	0	0
	452	KUE_T_2018	FASTmrMLM	BobWhite_c15073_502	2D	14395525	0.0004	5.4457	6.2591	0.1187	0.073	CC	0	0.0001
	453	KUE_T_2018	pLARmEB	BobWhite_c15073_502	2D	14395525	0.0003	5.7227	6.5461	0.0615	0.073	CC	0	0.0001
	454	FW_T_H	FASTmrMLM	wsnp_Ex_c58019_59494143	2D	14772787	-0.0011	3.0386	3.7363	0.2138	0.1124	CC	0.0001	0.0003
	455	KUtE_C_2017	FASTmrMLM	wsnp_CAP7_c888_455397	2D	14778789	-0.0038	3.5807	4.3104	1.3034	0.4944	NN	0	0.0001
	456	KUtE_T_2017	FASTmrMLM	wsnp_CAP7_c888_455397	2D	14778789	-0.0035	3.8217	4.5642	2.1003	0.4944	NN	0	0.0001
	457	FW_C_H	FASTmrMLM	BS00029208_51	2D	14897896	-0.0007	3.9162	4.6636	0.0618	0.0787	AA	0.0001	0.0005
	458	BY_C_2018	FASTmrEMMA	D_contig21303_418	2D	15517531	1.158	3.0576	3.7566	7.0052	0.2528	AA	2.819	3.4546
	459	KUtE_T_2018	pLARmEB	Ex_c14755_1390	2D	20769509	0.0003	13.7211	14.7241	0.0752	0.2921	GG	0	0.0001
	460	FLA_T_2018	FASTmrMLM	RAC875_c31045_841	2D	29744645	-1.6569	3.0794	3.7797	11.8174	0.1404	GG	10.6019	12.3173
	461	KUtE_T_2018	pLARmEB	Excalibur_c20196_264	2D	29879871	-0.0002	15.1999	15.9546	0.0037	0.0393	TT	0	0.0001
	462	GpS_C_2016	FASTmrEMMA	BobWhite_c23530_161	2D	31109855	-4.8112	3.1629	3.8684	7.2728	0.226	GG	33.0697	48.0483
	463	SW_C_H	mrMLM	BS00029303_51	2D	62023135	0.0263	3.7062	4.4427	7.0752	0.0172	A	0.0005	0.0007
	464	GY_T_2016	FASTmrEMMA	Tdurum_contig62852_369	2D	67441436	-1.5072	3.1406	3.8447	7.9779	0.0411	CC	0.7361	0.9271
	465	KUtE_T_2017	FASTmrMLM	Kukri_rep_c110868_147	2D	97275522	0.0003	6.2374	7.0783	0.0923	0.2191	CC	0	0.0001
	466	KUtE_T_2017	FASTmrEMMA	IAAV8184	2D	103465972	0.0015	3.5512	4.2793	0.3135	0.1629	TT	0.0001	0.0001
	467	KUtE_T_2018	pLARmEB	Tdurum_contig11768_756	2D	127115471	-0.0003	7.3546	8.2293	0.0529	0.2022	AA	0	0.0001
	468	SW_T_H	FASTmrMLM	Kukri_c10054_567	2D	128399271	0.0016	5.1212	5.9222	0.2578	0.4607	AA	0.0003	0.001
	469	SpL_T_2018	pLARmEB	wsnp_RFL_Contig454_5360785	2D	298840038	-0.1718	3.367	4.0847	1.1114	0.1798	TT	0.5799	1.4719
	470	PH_T_2017	pLARmEB	D_contig07718_714	2D	308028284	2.3534	4.4278	5.1996	3.088	0.1067	CC	14.2695	34.5645
	471	KUtE_C_2017	pLARmEB	RAC875_c20366_376	2D	330738253	0.0002	9.8012	10.7353	0.0247	0.1854	CC	0	0.0001
	472	SL_C_H	mrMLM	wsnp_Ex_rep_c66522_64795143	2D	552193001	-3.2704	4.9231	5.71611	19.0706	0.046	G	7.4302	13.692
	473	LA_T_2017	mrMLM	Excalibur_c42512_584	2D	577111928	1.7843	3.4122	4.13248	15.2004	0.2299	T	8.1728	11.4967
	474	LA_T_2017	FASTmrMLM	Excalibur_c42512_584	2D	577111928	1.3311	4.0243	4.7771	8.503	0.2472	TT	7.8949	11.4967
	475	LA_T_2017	FASTmrEMMA	Excalibur_c42512_584	2D	577111928	2.4557	3.0657	3.7651	7.9932	0.2472	TT	10.1297	11.4967
	476	BY_T_2018	mrMLM	Excalibur_c1140_1044	2D	584250210	-0.7315	4.0293	4.78231	12.8516	0.4023	G	2.1657	2.9564
	477	KUtE_T_2018	FASTmrMLM	BS00036456_51	2D	592788886	-0.0002	4.618	5.3982	0.0359	0.309	AA	0.0001	0.0001
	478	TKW_T_2017	mrMLM	BS00076042_51	2D	602109336	-2.7359	3.8223	4.56488	27.3581	0.1839	T	12.3273	17.2984
	479	TKW_T_2017	FASTmrMLM	BS00076042_51	2D	602109336	-2.5278	5.4747	6.2891	24.2938	0.1798	TT	11.2489	17.2984
	480	TKW_T_2017	pLARmEB	BS00076042_51	2D	602109336	-2.5163	5.4139	6.2261	21.3356	0.1798	TT	11.6758	17.2984
	481	FW_T_H	pLARmEB	D_GDS7LZN02G73QS_245	2D	614751087	0.001	14.4881	15.4775	0.3224	0.4045	TT	0.0001	0.0003
	482	HI_C_2017	FASTmrMLM	RAC875_c5673_1209	2D	622382766	0.0033	8.8567	9.7697	0.1957	0.2303	CC	0.0026	0.0046
	483	KUtE_T_2018	FASTmrMLM	RAC875_c31328_381	2D	629208199	0.0001	6.7603	7.6177	0.0019	0.0337	AA	0.0001	0.0001
	484	KUE_C_2017	FASTmrMLM	Kukri_c16161_231	2D	633606120	0.0001	3.8903	4.6364	0.0123	0.0618	CC	0	0
	485	KUtE_C_2017	pLARmEB	BobWhite_c16248_216	2D	633851769	0.0007	11.0472	12.0062	0.0868	0.0449	GG	0	0.0001
	486	GpS_T_2016	FASTmrMLM	wsnp_BE489901D_Ta_2_1	2D	637651044	-3.6316	4.5562	5.3337	20.2657	0.4315	TT	37.4218	59.6933
	487	GpS_T_2016	FASTmrEMMA	wsnp_BE489901D_Ta_2_1	2D	637651044	-6.2188	3.3503	4.067	9.0149	0.4315	TT	43.1151	59.6933
	488	GpS_T_2016	pLARmEB	wsnp_BE489901D_Ta_2_1	2D	637651044	-3.6316	4.5562	5.3337	20.2659	0.4315	TT	37.4218	59.6933
	489	PH_C_2018	FASTmrEMMA	wsnp_BE489901D_Ta_2_1	2D	637651044	-5.058	3.5702	4.2993	8.039	0.4157	TT	34.2651	45.1192
	490	PH_C_2018	pLARmEB	wsnp_BE489901D_Ta_2_1	2D	637651044	-1.872	3.0959	3.7972	7.3343	0.4157	TT	21.0452	45.1192
	491	SpS_T_2018	mrMLM	wsnp_BE489901D_Ta_2_1	2D	637651044	-1.266	4.3885	5.15849	13.5599	0.4138	T	4.2877	8.5281
	492	SpS_T_2018	pLARmEB	wsnp_BE489901D_Ta_2_1	2D	637651044	-1.0598	4.2505	5.0141	11.5899	0.4157	TT	5.0197	8.5281
	493	TN_T_2018	FASTmrMLM	RAC875_c17591_2085	2D	638862646	0.2918	3.1438	3.8481	5.7069	0.2921	GG	0.4398	0.6463
	494	KUtE_T_2018	pLARmEB	Kukri_c5276_801	2D	641603804	0.0001	14.0996	15.1095	0.0048	0.1011	AA	0	0.0001
	495	KUE_T_2017	pLARmEB	BS00065434_51	2D	647665734	-0.0002	12.3783	13.3613	0.0704	0.427	AG	0	0
	496	TN_C_2016	pLARmEB	D_GDEEGVY01AI4MO_416	2D	647673534	0.5801	3.0081	3.7039	18.0452	0.4452	GG	0.5596	0.8478
	497	KUtE_T_2017	FASTmrMLM	BobWhite_rep_c64888_511	3A	7476485	0.0006	3.8262	4.569	0.373	0.2584	CC	0	0.0001
	498	KUE_T_2017	pLARmEB	BobWhite_rep_c64888_511	3A	7476485	0.0001	5.6131	6.4326	0.0446	0.2584	CC	0	0
	499	GY_T_2016	mrMLM	Excalibur_c9485_686	3A	8864621	-1.5708	3.8395	4.58296	30.0247	0.0211	T	0.6803	0.9271
	500	BY_T_2018	FASTmrMLM	wsnp_Ra_c5532_9788185	3A	9855717	-1.231	3.3131	4.0276	8.1289	0.0449	CC	1.7883	2.9564
	501	BY_T_2018	pLARmEB	wsnp_Ra_c5532_9788185	3A	9855717	-1.4417	3.5326	4.2597	8.0962	0.0449	CC	1.7564	2.9564
	502	KUtE_T_2017	FASTmrMLM	Excalibur_c60530_113	3A	10586827	0.0002	8.4738	9.3777	0.0352	0.4719	TT	0	0.0001
	503	KUtE_T_2017	pLARmEB	Excalibur_c60530_113	3A	10586827	-0.0001	3.4732	4.1969	0.0209	0.4719	TT	0	0.0001
	504	GY_T_2017	mrMLM	RAC875_c787_395	3A	13037877	0.2201	3.833	4.57613	10.4129	0.4138	T	0.202	0.3102
	505	KUtE_T_2017	FASTmrMLM	Kukri_c54593_543	3A	13354520	0.0007	7.1685	8.0379	0.6293	0.4101	TT	0	0.0001
	506	TN_C_2017	mrMLM	BS00104401_51	3A	13405069	-0.2929	3.9225	4.67019	19.8797	0.2126	T	0.2409	0.2951
	507	KUpE_T_2018	FASTmrMLM	Kukri_rep_c84820_251	3A	13740044	-4.095e-05	3.3677	4.0854	9.7905e-07	0.0843	TT	0.0548	0.0605
	508	SW_T_H	FASTmrMLM	RFL_Contig2582_455	3A	14039855	-0.0002	3.3547	4.0717	0.0011	0.0281	TT	0.0003	0.001
	509	Chl_C_2018	FASTmrEMMA	Excalibur_c11505_155	3A	14850544	-1.8748	3.0576	3.7565	6.2493	0.4045	TT	10.5628	12.9157
	510	KUE_C_2018	pLARmEB	wsnp_Ex_c55051_57706127	3A	25359161	-0.0005	8.1869	9.0837	0.4807	0.2135	CC	0	0
	511	GY_C_2016	FASTmrMLM	Excalibur_c98205_83	3A	25493651	-0.3013	3.0911	3.7921	6.5954	0.3836	CC	0.6486	1.1659
	512	TN_C_2016	mrMLM	Kukri_c3289_932	3A	27007782	-0.5101	3.4515	4.17402	10.4783	0.1479	G	0.5659	0.8478
	513	TN_C_2016	FASTmrMLM	Kukri_c3289_932	3A	27007782	-0.3623	3.4515	4.174	6.2758	0.1438	GG	0.5538	0.8478
	514	TN_C_2016	pLARmEB	Kukri_c3289_932	3A	27007782	-0.3229	3.0386	3.7363	5.5903	0.1438	GG	0.5596	0.8478
	515	KUtE_T_2017	pLARmEB	IAAV5729	3A	36921408	0.0005	3.5804	4.3101	0.2017	0.1292	TC	0	0.0001
	516	KUtE_T_2018	FASTmrMLM	IAAV5729	3A	36921408	0.0002	14.5223	15.4775	0.0239	0.1292	TC	0.0001	0.0001
	517	KUtE_C_2018	pLARmEB	BobWhite_c52043_344	3A	45571335	0.0001	3.0863	3.787	0.0063	0.0955	GG	0	0.0001
	518	DM_C_2018	mrMLM	Ku_c18096_552	3A	45598472	1.0059	3.2268	3.93619	6.7964	0.4195	T	8.1918	12.7866
	519	KUE_T_2017	pLARmEB	wsnp_Ex_c4094_7399975	3A	46165751	-0.0006	12.0442	13.0211	0.4326	0.1124	GG	0	0
	520	KUtE_T_2017	FASTmrMLM	RAC875_c43816_91	3A	54939626	-7.1661e-05	3.6977	4.4337	0.0033	0.1067	GG	0	0.0001
	521	KUE_T_2017	pLARmEB	RAC875_c2464_274	3A	56676041	0.0002	13.224	14.2222	0.1002	0.2135	CC	0	0
	522	CHL_14DAG_C_H	FASTmrEMMA	RAC875_c6445_275	3A	57856067	-1.3078	3.3423	4.0586	5.9011	0.3989	AA	3.834	6.7055
	523	KUE_T_2018	pLARmEB	wsnp_Ex_c57322_59084809	3A	59521598	-0.0002	4.2156	4.9776	0.0326	0.2528	GG	0	0.0001
	524	FW_T_H	pLARmEB	wsnp_Ex_c57322_59084809	3A	59521598	0.0002	3.3238	4.039	0.0123	0.2528	GG	0.0001	0.0003
	525	NA_T_H	mrMLM	wsnp_Ex_c57322_59084809	3A	59521598	62141.9	3.2598	3.97117	7.1052	0.2356	G	1.47395e+10	3.19381e+10
	526	NA_T_H	FASTmrMLM	wsnp_Ex_c57322_59084809	3A	59521598	43103.2	3.2598	3.9712	4.0033	0.2528	GG	1.83575e+10	3.19381e+10
	527	Chl_T_2018	FASTmrMLM	BobWhite_rep_c55551_53	3A	431127815	2.12	3.8714	4.6165	6.6934	0.1742	CC	25.7743	35.9326
	528	Chl_T_2018	pLARmEB	BobWhite_rep_c55551_53	3A	431127815	1.5119	3.1564	3.8615	1.7263	0.1742	CC	20.5111	35.9326
	529	KUtE_C_2018	pLARmEB	BS00045327_51	3A	485012195	0.0005	3.1508	3.8556	0.0685	0.0843	AA	0	0.0001
	530	KUE_C_2018	pLARmEB	BS00045327_51	3A	485012195	6.9591e-05	4.0272	4.7801	0.0041	0.0843	AA	0	0
	531	KUtE_T_H	pLARmEB	JD_c356_431	3A	517662054	-0.4032	5.858	6.6862	10.2494	0.0618	AA	0.1485	0.2473
	532	KUtE_T_2017	FASTmrMLM	wsnp_RFL_Contig1944_1115756	3A	532645881	-0.001	4.8515	5.6416	0.3575	0.0674	CC	0	0.0001
	533	KUtE_T_H	mrMLM	Kukri_c36200_1000	3A	544394535	-0.316	3.2822	3.9949	17.4398	0.1034	G	0.1781	0.2473
	534	KUtE_T_H	FASTmrMLM	Kukri_c36200_1000	3A	544394535	-0.3166	5.4141	6.2263	18.4521	0.1011	GG	0.1514	0.2473
	535	KUE_C_2018	pLARmEB	Ku_c53625_627	3A	561118774	-6.9943e-05	5.4443	6.2576	0.0125	0.3876	AA	0	0
	536	KUtE_T_2018	FASTmrMLM	wsnp_Ex_c11877_19055556	3A	578873757	4.8684e-05	14.562	15.6536	0.0002	0.0112	TT	0.0001	0.0001
	537	NA_C_H	mrMLM	Ex_c24992_1659	3A	605845863	-3.2098	3.2718	3.98388	6.5591	0.0402	A	6.8329	16.5406
	538	Na+_C_H	mrMLM	Ex_c24992_1659	3A	605845863	-3.2098	3.2718	3.98388	6.5591	0.0402	A	6.8329	16.5406
	539	KUE_C_2017	FASTmrMLM	Ku_c61039_131	3A	605847997	-0.0002	7.5008	8.3795	0.0159	0.0337	AA	0	0
	540	KUE_C_2017	pLARmEB	Ku_c61039_131	3A	605847997	-0.0002	9.8214	10.7559	0.0173	0.0337	AA	0	0
	541	Na+_T_2018	pLARmEB	Tdurum_contig76105_201	3A	624534034	10.3318	3.686	4.4214	7.5722	0.1067	CC	302.626	424.758
	542	SpS_T_2018	mrMLM	BS00061173_51	3A	625393622	-1.1056	3.4721	4.19579	10.7188	0.3908	G	4.2877	8.5281
	543	SpS_T_2018	FASTmrMLM	BS00061173_51	3A	625393622	-1.0286	4.4405	5.2128	11.1014	0.382	GG	5.8134	8.5281
	544	SpS_T_2018	pLARmEB	BS00061173_51	3A	625393622	-0.8748	4.3963	5.1666	8.1835	0.382	GG	5.0197	8.5281
	545	KUtE_C_2017	pLARmEB	BS00067748_51	3A	641407220	-0.001	12.785	13.7756	0.1908	0.0506	CC	0	0.0001
	546	SL_C_H	pLARmEB	Ra_c1619_250	3A	649632020	-1.9844	4.5872	5.366	3.9123	0.0899	AA	6.6	13.692
	547	KUE_C_2018	pLARmEB	JD_c52237_348	3A	663176268	0.0001	12.3217	13.3033	0.0042	0.0225	TT	0	0
	548	Na+_C_2018	mrMLM	BS00049977_51	3A	688688770	8.0856	3.7883	4.52912	7.7479	0.3851	C	247.897	509.913
	549	BY_C_2016	pLARmEB	BS00048242_51	3A	713642158	0.2828	3.1703	3.8763	2.7359	0.2123	GG	0.9318	2.0545
	550	KUtE_C_2017	FASTmrMLM	Kukri_c18258_440	3A	714425105	-0.0005	8.3006	9.2002	0.1054	0.1461	TT	0	0.0001
	551	KUE_C_2017	FASTmrMLM	Kukri_c18258_440	3A	714425105	0.0005	6.9643	7.8278	0.3599	0.1461	TT	0	0
	552	KUE_C_2017	pLARmEB	Kukri_c18258_440	3A	714425105	0.0002	6.9213	7.7835	0.0381	0.1461	TT	0	0
	553	FW_T_H	pLARmEB	Kukri_c18258_440	3A	714425105	-0.0002	3.5297	4.2566	0.0054	0.1461	TT	0.0001	0.0003
	554	FW_T_H	FASTmrMLM	BS00065673_51	3A	721666010	-0.0007	6.6831	7.5381	0.0323	0.0449	AA	0.0001	0.0003
	555	CHL_14DAG_T_H	pLARmEB	BS00065673_51	3A	721666010	-1.4344	3.464	4.1872	4.4137	0.0449	AA	4.0403	7.9209
	556	SpS_T_2018	mrMLM	Tdurum_contig28518_122	3A	725739412	-2.5475	3.8611	4.60567	27.1307	0.4425	T	4.2877	8.5281
	557	SpS_T_2018	FASTmrMLM	Tdurum_contig28518_122	3A	725739412	-1.827	3.324	4.0392	16.6988	0.4438	TC	5.8134	8.5281
	558	HI_T_2017	FASTmrMLM	BobWhite_c29014_241	3A	727072931	-1.7987e-05	7.418	8.2944	2.7193e-07	0.0281	CC	0.0108	0.0155
	559	KUE_T_2017	pLARmEB	BobWhite_c29014_241	3A	727072931	-0.0001	4.9982	5.7943	0.0044	0.0281	CC	0	0
	560	FW_T_H	FASTmrMLM	Ra_c7114_619	3A	727399261	-0.0009	7.3075	8.1809	0.2936	0.3933	GG	0.0001	0.0003
	561	SpL_T_2017	mrMLM	RAC875_c99055_69	3A	728322677	-0.29	3.3518	4.06859	8.7852	0.3103	T	0.3071	0.7225
	562	SpS_T_2017	mrMLM	RAC875_c99055_69	3A	728322677	-0.6693	4.3773	5.14678	11.5642	0.3103	T	0.9289	2.3605
	563	HI_T_2017	FASTmrMLM	RAC875_c99055_69	3A	728322677	0.0299	5.3207	6.1294	4.8857	0.3258	TT	0.0108	0.0155
	564	KUE_C_2018	FASTmrMLM	BS00057524_51	3A	735716721	0.0005	3.2867	3.9997	0.5401	0.1685	AA	0	0
	565	SL_C_H	mrMLM	GENE-2081_34	3A	735891449	-3.1961	9.1378	10.0573	35.2227	0.1437	C	7.4302	13.692
	566	SL_C_H	pLARmEB	GENE-2081_34	3A	735891449	-2.8702	9.7763	10.7099	9.8325	0.1404	CC	6.6	13.692
	567	KUtE_T_2017	pLARmEB	CAP7_c915_121	3A	736388750	0.0001	6.7384	7.5951	0.0194	0.4326	AA	0	0.0001
	568	Chl_C_2018	FASTmrMLM	Tdurum_contig5009_392	3A	741240018	-3.2541	3.1422	3.8464	16.9151	0.4663	TC	7.608	12.9157
	569	TKW_C_2018	FASTmrEMMA	wsnp_Ex_c24085_33332723	3A	743758024	3.3763	3.264	3.9756	7.0665	0.3652	CC	29.0738	36.0368
	570	RL_C_H	mrMLM	wsnp_Ku_c5359_9530161	3A	744436134	1.9964	3.5959	4.32646	7.9056	0.477	A	18.0166	33.8137
	571	RL_C_H	FASTmrMLM	wsnp_Ku_c5359_9530161	3A	744436134	1.442	3.5959	4.3265	5.1032	0.4888	AA	21.3196	33.8137
	572	RW_C_H	mrMLM	wsnp_Ku_c5359_9530161	3A	744436134	-0.574	4.1607	4.92008	12.3261	0.477	A	1.5132	2.1234
	573	RW_C_H	FASTmrMLM	wsnp_Ku_c5359_9530161	3A	744436134	-0.5081	5.5018	6.3172	11.6827	0.4888	AA	1.2747	2.1234
	574	RW_C_H	FASTmrEMMA	wsnp_Ku_c5359_9530161	3A	744436134	-0.9884	4.5434	5.3204	10.8494	0.4888	AA	1.3944	2.1234
	575	RW_C_H	pLARmEB	wsnp_Ku_c5359_9530161	3A	744436134	-0.5081	5.842	6.6696	10.4547	0.4888	AA	1.2743	2.1234
	576	KUtE_C_2018	pLARmEB	BS00064065_51	3A	749346724	0.0006	3.1956	3.9031	0.084	0.4326	TC	0	0.0001
	577	KUE_C_2018	FASTmrMLM	tplb0028p23_691	3B	2519487	-0.0005	10.2455	11.1888	0.2544	0.0674	GG	0	0
	578	FW_T_H	FASTmrMLM	wsnp_Ra_c41135_48426638	3B	3408685	-0.0015	9.7825	10.7162	0.4321	0.4213	CC	0.0001	0.0003
	579	SL_T_H	FASTmrEMMA	wsnp_Ku_c1629_3206989	3B	3411022	-2.2577	3.651	4.3845	9.9559	0.2472	AA	6.1697	8.3768
	580	KUtE_C_2018	pLARmEB	Tdurum_contig47506_495	3B	4328329	0.0002	8.1084	9.0032	0.0137	0.0787	GG	0	0.0001
	581	KUtE_C_2018	pLARmEB	CAP7_c4121_370	3B	6250719	0.0003	5.32	6.1286	0.0841	0.1854	CC	0	0.0001
	582	TN_T_2017	mrMLM	BobWhite_c9992_862	3B	6395435	-0.1185	6.0731	6.90859	10.9666	0.2989	A	0.0302	0.0817
	583	TN_T_2017	FASTmrMLM	BobWhite_c9992_862	3B	6395435	-0.1083	4.8451	5.6349	10.428	0.2921	AA	0.037	0.0817
	584	TN_T_2017	FASTmrEMMA	BobWhite_c9992_862	3B	6395435	-0.2573	3.4383	4.1601	16.7486	0.2921	AA	0.061	0.0817
	585	TN_T_2017	pLARmEB	BobWhite_c9992_862	3B	6395435	-0.1111	4.6479	5.4294	6.8027	0.2921	AA	0.0421	0.0817
	586	BY_T_2017	pLARmEB	BobWhite_c9992_862	3B	6395435	-0.2629	3.5813	4.3111	2.4869	0.2921	AA	0.6625	1.3418
	587	Na+_C_2018	mrMLM	BobWhite_c3902_145	3B	7604618	-12.2007	4.3306	5.09794	8.9384	0.1322	C	247.897	509.913
	588	KUtE_T_2017	pLARmEB	Kukri_rep_c96809_457	3B	8806796	-0.0004	4.7787	5.5657	0.202	0.3933	CC	0	0.0001
	589	HI_T_2017	FASTmrMLM	RAC875_c76367_523	3B	10709748	2.6601e-05	6.2688	7.1108	3.6882e-06	0.3146	AA	0.0108	0.0155
	590	KUtE_C_2017	FASTmrMLM	RAC875_c21604_1625	3B	13964016	0.0034	5.57	6.3879	5.5593	0.4045	CC	0	0.0001
	591	FW_T_H	pLARmEB	RAC875_c21604_1625	3B	13964016	-0.002	4.857	5.6473	0.8191	0.4045	CC	0.0001	0.0003
	592	TN_C_2018	mrMLM	RAC875_c34649_1053	3B	13967077	-0.833	3.9954	4.74674	39.3466	0.4368	T	0.4569	0.6647
	593	TN_C_2018	FASTmrMLM	RAC875_c34649_1053	3B	13967077	-0.5899	4.1844	4.9449	23.9571	0.4326	TG	0.4063	0.6647
	594	TN_C_2018	FASTmrEMMA	RAC875_c34649_1053	3B	13967077	-1.1662	3.3792	4.0976	8.2655	0.4326	TG	0.534	0.6647
	595	TN_C_2018	pLARmEB	RAC875_c34649_1053	3B	13967077	-0.726	7.5062	8.3851	28.2169	0.4326	TG	0.2965	0.6647
	596	KUE_T_2017	pLARmEB	Tdurum_contig22897_107	3B	24942898	0.0002	10.2889	11.2331	0.0262	0.1011	AA	0	0
	597	GY_C_2016	mrMLM	RAC875_c14803_873	3B	32237897	-0.5639	4.1499	4.90876	10.3102	0.2254	A	0.6098	1.1659
	598	RL_T_2017	mrMLM	BS00011806_51	3B	35322028	7.9884	5.4151	6.22732	14.1971	0.2394	C	57.1283	107.424
	599	RL_T_2017	FASTmrMLM	BS00011806_51	3B	35322028	6.4165	6.3793	7.2248	9.781	0.2466	CC	66.0556	107.424
	600	FW_T_H	pLARmEB	BS00068168_51	3B	35634072	-8.3085e-05	6.0071	6.8404	0.0003	0.0169	GG	0.0001	0.0003
	601	SW_T_H	FASTmrMLM	Tdurum_contig81690_353	3B	66180408	-0.0012	6.0068	6.8401	0.0588	0.0787	AA	0.0003	0.001
	602	KUpE_C_2017	pLARmEB	BobWhite_c9850_306	3B	296502406	0.0276	6.5855	7.4375	1.969	0.4719	AA	0.0103	0.0177
	603	CHL_T_T_2017	FASTmrMLM	wsnp_CAP11_c558_382875	3B	399970923	0.0001	4.7824	5.5696	4.9239e-07	0.3764	AA	3.4632	3.5029
	604	CHL_T_T_2017	FASTmrEMMA	wsnp_CAP11_c558_382875	3B	399970923	1.2874	3.5039	4.2294	10.1755	0.3764	AA	2.6627	3.5029
	605	CHL_14DAG_T_H	pLARmEB	BobWhite_c17332_325	3B	457978554	1.33	6.4739	7.3224	15.9382	0.2303	GG	4.0403	7.9209
	606	KUtE_C_2018	pLARmEB	wsnp_Ex_c1116_2138756	3B	462099622	0.0006	7.4118	8.2881	0.2643	0.1573	TT	0	0.0001
	607	KUE_C_2018	FASTmrMLM	wsnp_Ex_c1116_2138756	3B	462099622	0.0009	10.7723	11.7261	1.7403	0.1573	TT	0	0
	608	FW_T_H	FASTmrMLM	RAC875_c29367_314	3B	467335886	-0.0015	7.1677	8.0371	0.368	0.073	GG	0.0001	0.0003
	609	K_T_H	mrMLM	Excalibur_c16842_743	3B	480569101	6.8303	3.767	4.5067	15.9941	0.4713	T	205.058	273.641
	610	K_T_H	FASTmrMLM	Excalibur_c16842_743	3B	480569101	4.7991	3.5888	4.319	8.3901	0.4831	TT	206.204	273.641
	611	KUpE_T_H	mrMLM	Excalibur_c16842_743	3B	480569101	0.2277	3.767	4.5067	15.9941	0.4713	T	0.2278	0.304
	612	KUpE_T_H	FASTmrMLM	Excalibur_c16842_743	3B	480569101	0.1588	3.2484	3.9591	8.2672	0.4831	TT	0.2302	0.304
	613	NA_C_H	mrMLM	BS00039734_51	3B	485693222	1.8048	3.3627	4.08013	3.9005	0.1092	T	6.8329	16.5406
	614	Na+_C_H	mrMLM	BS00039734_51	3B	485693222	1.8048	3.3627	4.08013	3.9005	0.1092	T	6.8329	16.5406
	615	FW_C_H	FASTmrMLM	RFL_Contig4421_1490	3B	581658902	-0.0025	4.0294	4.7824	0.7962	0.2022	AA	0.0001	0.0005
	616	RL_C_2017	mrMLM	BS00094260_51	3B	582408186	-3.7991	4.0449	4.79868	22.7853	0.2324	C	28.182	52.7719
	617	RL_C_2017	FASTmrMLM	BS00094260_51	3B	582408186	-3.2047	4.0449	4.7987	16.3903	0.2397	CC	32.5679	52.7719
	618	FW_C_H	FASTmrMLM	IACX11310	3B	586512242	0.0006	9.7865	10.7203	0.0574	0.2697	CC	0.0001	0.0005
	619	KUtE_C_2018	pLARmEB	Ku_c15750_761	3B	614902501	-0.0001	4.0155	4.7678	0.0033	0.0393	GG	0	0.0001
	620	KUtE_C_2017	pLARmEB	Ra_c69660_1589	3B	651720749	-0.0007	3.2518	3.9627	0.1718	0.1461	GG	0	0.0001
	621	FW_C_H	FASTmrMLM	wsnp_Ex_c17407_26107953	3B	681100205	-0.0013	10.0103	10.9488	0.0835	0.0618	CC	0.0001	0.0005
	622	SL_C_H	FASTmrEMMA	wsnp_Ex_c13154_20785032	3B	728910227	3.2167	4.6639	5.446	15.4982	0.309	AA	11.0563	13.692
	623	PH_T_2017	pLARmEB	wsnp_Ex_c19778_28779907	3B	739170520	1.5955	5.7087	6.5316	3.5035	0.4326	GG	14.2695	34.5645
	624	KUtE_C_2018	pLARmEB	TA002070-0603-w	3B	761005338	-0.0009	5.5461	6.3632	0.5384	0.191	TT	0	0.0001
	625	KUtE_T_2018	FASTmrMLM	wsnp_CAP12_c2297_1121142	3B	783466186	0.0005	5.752	6.5764	0.1554	0.2079	CC	0.0001	0.0001
	626	KUE_T_2018	pLARmEB	wsnp_CAP12_c2297_1121142	3B	783466186	0.0009	3.6364	4.3692	1.0184	0.2079	CC	0	0.0001
	627	BY_T_2016	FASTmrMLM	Kukri_rep_c68685_795	3B	784488285	-0.0003	3.0814	3.7818	1.6178e-06	0.1712	CC	2.2092	2.7023
	628	BY_T_2016	pLARmEB	Kukri_rep_c68685_795	3B	784488285	-0.6379	3.376	4.0942	7.2116	0.1712	CC	1.886	2.7023
	629	GpS_T_2016	FASTmrMLM	Ra_c106454_621	3B	814887452	-3.6021	3.3937	4.1129	8.4839	0.1096	CC	37.4218	59.6933
	630	GpS_T_2016	FASTmrEMMA	Ra_c106454_621	3B	814887452	-8.0902	3.5862	4.3163	10.6991	0.1096	CC	43.1151	59.6933
	631	GpS_T_2016	pLARmEB	Ra_c106454_621	3B	814887452	-3.602	3.3937	4.1129	8.4837	0.1096	CC	37.4218	59.6933
	632	FW_T_H	FASTmrMLM	BS00067515_51	3B	815511497	0.0004	4.0099	4.762	0.0437	0.1573	TT	0.0001	0.0003
	633	SpS_T_2018	FASTmrEMMA	BS00104177_51	3B	819860860	-3.1541	4.2097	4.9714	11.8116	0.118	AA	6.0236	8.5281
	634	KUtE_T_H	mrMLM	RAC875_c5222_290	3B	820505440	0.2179	3.3955	4.11482	15.8891	0.2989	C	0.1781	0.2473
	635	KUtE_T_H	FASTmrMLM	RAC875_c5222_290	3B	820505440	0.1667	4.3518	5.1201	9.7958	0.2921	CC	0.1514	0.2473
	636	KUtE_T_H	FASTmrEMMA	RAC875_c5222_290	3B	820505440	0.3425	3.1421	3.8464	8.7411	0.2921	CC	0.1901	0.2473
	637	KUtE_T_H	pLARmEB	RAC875_c5222_290	3B	820505440	0.1722	4.159	4.9183	5.7648	0.2921	CC	0.1485	0.2473
	638	FW_T_H	FASTmrMLM	Tdurum_contig11114_335	3B	822828858	-0.0004	12.1078	13.0859	0.004	0.0112	AA	0.0001	0.0003
	639	RL_C_2018	pLARmEB	Tdurum_contig59566_4435	3B	822969685	-2.1371	4.5412	5.318	2.2513	0.2528	AA	22.6434	86.267
	640	HI_T_2016	mrMLM	Excalibur_c19658_127	3D	1253783	-5.2959	4.3007	5.06666	16.1494	0.493	G	67.8796	142.625
	641	KUtE_T_2017	pLARmEB	RAC875_c29367_244	3D	1255387	-0.0002	4.0774	4.8328	0.0357	0.0787	GG	0	0.0001
	642	SW_C_H	mrMLM	RAC875_c66580_276	3D	1638940	-0.0284	3.5461	4.27392	33.9367	0.0517	G	0.0005	0.0007
	643	GY_T_2016	pLARmEB	BS00070783_51	3D	2400568	-0.3627	3.2295	3.939	10.1256	0.363	NN	0.6379	0.9271
	644	KUtE_T_2018	pLARmEB	BS00070783_51	3D	2400568	-0.0003	12.9768	13.9678	0.0604	0.3708	NN	0	0.0001
	645	GpS_C_2017	pLARmEB	Excalibur_c18826_761	3D	2596317	1.6332	3.8356	4.5789	5.9147	0.4607	AA	28.7359	44.9544
	646	KUE_T_2017	pLARmEB	Excalibur_c57482_473	3D	2596417	-0.0004	6.1983	7.038	0.2588	0.1517	AA	0	0
	647	KUtE_C_2017	pLARmEB	Excalibur_c18826_452	3D	2597073	0.0024	8.9395	9.8545	0.1785	0.5	AG	0	0.0001
	648	TN_C_2018	pLARmEB	Excalibur_c18826_452	3D	2597073	-1.1423	4.2468	5.0103	5.8544	0.5	AG	0.2965	0.6647
	649	Na+_C_2018	mrMLM	RAC875_c26767_158	3D	2981294	12.0549	4.9176	5.71039	14.4667	0.4598	C	247.897	509.913
	650	KUE_T_2017	pLARmEB	wsnp_JD_c5170_6293946	3D	3301384	-0.0016	10.8227	11.7775	1.936	0.4831	AA	0	0
	651	HI_T_2016	FASTmrMLM	Kukri_c12401_301	3D	4394820	-6.8621	3.7549	4.494	22.6479	0.411	GG	85.0659	142.625
	652	HI_T_2016	pLARmEB	Kukri_c12401_301	3D	4394820	-5.6742	4.1459	4.9046	16.7751	0.411	GG	50.1635	142.625
	653	KUE_T_2017	pLARmEB	BS00003774_51	3D	32205600	-5.4443e-05	3.1847	3.8915	0.0022	0.0674	GG	0	0
	654	KUE_C_2018	pLARmEB	BobWhite_rep_c49779_74	3D	92749990	-0.0001	5.8675	6.696	0.0136	0.0449	TT	0	0
	655	KUtE_C_2018	pLARmEB	wsnp_Ex_c36364_44338188	3D	94494742	-0.0004	4.2044	4.9659	0.027	0.0393	GG	0	0.0001
	656	FW_T_H	pLARmEB	wsnp_Ex_c18250_27065775	3D	122454668	-0.0001	9.5955	10.5252	0.0036	0.2865	TT	0.0001	0.0003
	657	NA_C_H	mrMLM	Kukri_c8913_655	3D	512675071	-3.2507	3.6285	4.36083	4.1324	0.0345	T	6.8329	16.5406
	658	Na+_C_H	mrMLM	Kukri_c8913_655	3D	512675071	-3.2507	3.6285	4.36083	4.1324	0.0345	T	6.8329	16.5406
	659	DM_T_2018	FASTmrMLM	RAC875_c26039_1567	3D	584335777	2.7269	4.2399	5.003	14.0068	0.0955	TT	10.3267	18.4308
	660	DM_T_2018	FASTmrEMMA	RAC875_c26039_1567	3D	584335777	2.1669e-05	3.4907	4.2155	1.986e-10	0.0955	TT	18.2235	18.4308
	661	DM_T_2018	pLARmEB	RAC875_c26039_1567	3D	584335777	3.2406	6.1293	6.9667	9.8478	0.0955	TT	8.5267	18.4308
	662	SW_T_H	FASTmrMLM	RAC875_c35955_210	3D	603414807	-0.0008	4.5208	5.2967	0.0173	0.0562	GG	0.0003	0.001
	663	CHL_14DAG_T_H	pLARmEB	BS00105800_51	3D	611558324	0.9402	3.4169	4.1375	9.5264	0.2247	AA	4.0403	7.9209
	664	CHL_21DAG_T_H	pLARmEB	BS00105800_51	3D	611558324	0.7054	3.0835	3.7841	7.733	0.2247	AA	2.9667	5.307
	665	PH_T_2018	mrMLM	GENE-1910_113	3D	613601884	-5.8295	4.026	4.77885	19.2048	0.0805	A	41.329	51.2913
	666	PH_T_2018	FASTmrMLM	GENE-1910_113	3D	613601884	-4.7684	4.3803	5.1499	12.8499	0.0787	AA	32.7052	51.2913
	667	PH_T_2018	pLARmEB	GENE-1910_113	3D	613601884	-4.5146	4.4421	5.2145	11.5181	0.0787	AA	33.079	51.2913
	668	DM_C_2017	mrMLM	BS00065863_51	4A	12208846	-1.4248	3.9074	4.65433	16.0444	0.3621	T	6.7323	11.0976
	669	DM_C_2017	FASTmrEMMA	Ex_c883_2618	4A	17259259	-2.1511	3.895	4.6413	9.041	0.3427	AA	7.262	11.0976
	670	DM_C_2017	pLARmEB	Ex_c883_2618	4A	17259259	-1.0826	3.7324	4.4703	9.7276	0.3427	AA	7.0788	11.0976
	671	KUE_T_2017	pLARmEB	Tdurum_contig8061_56	4A	24764302	-8.7602e-05	14.1916	15.1764	0.0034	0.0393	TT	0	0
	672	FW_C_H	mrMLM	wsnp_JD_c13364_13377722	4A	43698729	0.0243	4.6452	5.42655	24.387	0.4368	C	0.0002	0.0005
	673	FW_C_H	FASTmrMLM	wsnp_JD_c13364_13377722	4A	43698729	0.0118	12.8971	13.8901	12.7887	0.4382	TC	0.0001	0.0005
	674	KUE_C_H	mrMLM	wsnp_JD_c13364_13377722	4A	43698729	0.4049	4.6452	5.42655	24.387	0.4368	C	0.0639	0.1318
	675	FW_T_H	FASTmrMLM	Tdurum_contig9906_89	4A	45109781	-0.001	12.6432	13.6303	0.2757	0.236	CC	0.0001	0.0003
	676	FW_C_H	FASTmrMLM	Ra_c492_1845	4A	46123570	0.002	9.5899	10.5195	0.6508	0.2528	CC	0.0001	0.0005
	677	FW_T_H	FASTmrMLM	BobWhite_c20514_70	4A	46172347	0.0001	5.9918	6.8246	0.0031	0.2191	AA	0.0001	0.0003
	678	PH_C_2018	mrMLM	wsnp_Ku_c11945_19406789	4A	231002068	2.3962	5.3492	6.15894	11.8121	0.4425	T	30.7549	45.1192
	679	PH_C_2018	FASTmrMLM	wsnp_Ku_c11945_19406789	4A	231002068	2.5763	4.6034	5.3829	13.6002	0.4326	TT	30.9476	45.1192
	680	KUE_C_2017	FASTmrMLM	BobWhite_c20183_318	4A	558216958	-0.0002	14.3461	15.3525	0.1074	0.2135	GG	0	0
	681	KUtE_T_2018	FASTmrMLM	Excalibur_c80450_75	4A	577863491	-0.0002	11.6213	12.591	0.0042	0.0449	AA	0.0001	0.0001
	682	KUE_T_2018	FASTmrMLM	Kukri_c36190_189	4A	593349864	-0.0002	4.7906	5.5781	0.01	0.0449	CC	0	0.0001
	683	PH_T_2018	pLARmEB	BS00065444_51	4A	618033575	2.5437	3.5063	4.2319	5.4658	0.118	CC	33.079	51.2913
	684	BY_T_2018	FASTmrMLM	Tdurum_contig22511_355	4A	624123254	2.4989	5.7669	6.5919	39.7165	0.4663	AG	1.7883	2.9564
	685	SpS_C_2017	FASTmrMLM	Excalibur_c76268_300	4A	625244220	-0.437	3.4216	4.1424	6.7529	0.3258	GG	1.6976	2.6043
	686	KUE_C_2018	FASTmrMLM	Kukri_c35049_357	4A	625396699	-0.0007	13.6104	14.6122	0.7519	0.2303	GG	0	0
	687	KUtE_T_2018	FASTmrMLM	RAC875_c390_1494	4A	631575032	0.0007	6.4217	7.2686	0.0825	0.0506	CC	0.0001	0.0001
	688	KUE_T_2018	FASTmrMLM	RAC875_c390_1494	4A	631575032	0.0008	3.4349	4.1565	0.2586	0.0506	CC	0	0.0001
	689	RL_C_H	mrMLM	Tdurum_contig13582_162	4A	631901598	3.3861	3.3098	4.02413	14.1443	0.477	C	18.0166	33.8137
	690	RL_C_H	FASTmrMLM	Tdurum_contig13582_162	4A	631901598	2.4768	3.3098	4.0241	9.3635	0.4663	CC	21.3196	33.8137
	691	RW_C_H	mrMLM	Tdurum_contig13582_162	4A	631901598	-1.1487	3.8078	4.54963	30.7053	0.477	C	1.5132	2.1234
	692	RW_C_H	FASTmrMLM	Tdurum_contig13582_162	4A	631901598	-0.7835	3.9773	4.7277	17.2807	0.4663	CC	1.2747	2.1234
	693	RW_C_H	FASTmrEMMA	Tdurum_contig13582_162	4A	631901598	-1.7482	3.5775	4.307	11.1564	0.4663	CC	1.3944	2.1234
	694	SL_T_H	mrMLM	Excalibur_rep_c102020_253	4A	631922510	0.9952	3.0086	3.70441	8.6726	0.2644	T	4.0911	8.3768
	695	SL_T_H	FASTmrMLM	Excalibur_rep_c102020_253	4A	631922510	1.1445	3.9927	4.7439	12.9353	0.2584	TT	5.9568	8.3768
	696	KUpE_C_2018	pLARmEB	BS00059503_51	4A	639041793	-0.0006	3.0583	3.7573	4.3587e-05	0.4831	AG	0.0252	0.0327
	697	TKW_C_2017	pLARmEB	IAAV1383	4A	646784523	1.3686	3.3362	4.0521	3.2671	0.2303	AA	11.4398	17.2414
	698	KUtE_T_2017	pLARmEB	GENE-3129_436	4A	674554463	9.274e-05	8.7726	9.6837	0.0015	0.0281	AA	0	0.0001
	699	KUtE_T_2018	pLARmEB	Kukri_rep_c96828_86	4A	690970262	-0.0004	11.3236	12.2878	0.1062	0.2809	GG	0	0.0001
	700	KUE_C_2018	FASTmrMLM	BS00021957_51	4A	693278257	-0.0001	3.4505	4.173	0.0201	0.1854	GG	0	0
	701	KUtE_C_2018	pLARmEB	RAC875_c67397_67	4A	697444001	-0.001	3.6715	4.4061	0.4524	0.1011	GG	0	0.0001
	702	RL_C_2018	pLARmEB	IAAV1106	4A	712597176	-2.5096	6.6295	7.4829	3.5682	0.3933	GG	22.6434	86.267
	703	RW_T_H	pLARmEB	wsnp_CAP7_c254_138937	4A	712856493	0.1672	3.5407	4.2682	1.3812	0.2472	CC	0.4896	1.1757
	704	KUtE_C_2017	pLARmEB	Tdurum_contig47783_676	4A	713522150	0.0005	3.5389	4.2663	0.1062	0.191	GG	0	0.0001
	705	KUpE_C_2017	pLARmEB	BS00045546_51	4A	713522896	-0.0001	4.0357	4.789	2.5858e-05	0.1685	GG	0.0103	0.0177
	706	KUtE_C_2017	pLARmEB	BobWhite_c20322_559	4A	713523062	0.0003	3.4724	4.1961	0.0354	0.1685	GG	0	0.0001
	707	TN_C_2016	mrMLM	Excalibur_c261_1782	4A	714846092	1.4973	3.8309	4.57392	45.0069	0.4718	A	0.5659	0.8478
	708	TN_C_2016	FASTmrMLM	Excalibur_c261_1782	4A	714846092	1.0758	3.8309	4.5739	27.5813	0.4726	AG	0.5538	0.8478
	709	TN_C_2016	pLARmEB	Excalibur_c261_1782	4A	714846092	0.9123	3.6784	4.4134	22.251	0.4726	AG	0.5596	0.8478
	710	KUtE_T_2018	FASTmrMLM	RAC875_rep_c106976_263	4A	721385788	-0.0003	3.9165	4.6639	0.0257	0.0674	CC	0.0001	0.0001
	711	KUtE_C_2018	pLARmEB	BobWhite_c3259_96	4A	724855804	0.0001	7.1008	7.9683	0.0105	0.3596	CC	0	0.0001
	712	DM_T_2017	FASTmrMLM	BS00061710_51	4A	728280811	1.0303	4.5651	5.343	15.2559	0.4494	GG	4.6544	5.8373
	713	DM_T_2017	FASTmrEMMA	BS00061710_51	4A	728280811	1.6728	3.066	3.7655	8.0916	0.4494	GG	5.1327	5.8373
	714	LA_T_2017	mrMLM	BS00061710_51	4A	728280811	-1.5535	3.5307	4.25767	18.6445	0.4598	G	8.1728	11.4967
	715	LA_T_2017	FASTmrMLM	BS00061710_51	4A	728280811	-1.1234	3.5517	4.2798	9.8009	0.4494	GG	7.8949	11.4967
	716	LA_T_2017	pLARmEB	BS00061710_51	4A	728280811	-0.9519	3.0871	3.7879	7.1428	0.4494	GG	7.2959	11.4967
	717	KUtE_C_2018	pLARmEB	BS00081698_51	4A	733696286	-0.0003	7.5611	8.4415	0.0068	0.0169	CC	0	0.0001
	718	TKW_C_2016	FASTmrMLM	BS00110758_51	4A	734001785	3.7047	3.1887	3.8958	16.5545	0.4863	TT	18.9186	27.3688
	719	TKW_T_2016	mrMLM	BS00110758_51	4A	734001785	5.209	4.4297	5.20155	25.8825	0.5	T	21.1825	30.899
	720	KUE_C_2018	FASTmrMLM	RAC875_s119811_122	4A	734017806	0.0002	5.0292	5.8265	0.0347	0.0787	AA	0	0
	721	GY_C_2016	pLARmEB	BS00075751_51	4A	736519211	0.7545	3.3284	4.0438	7.4957	0.4863	NN	0.4718	1.1659
	722	KUtE_T_2018	pLARmEB	BS00075751_51	4A	736519211	-0.0031	8.7693	9.6803	1.1885	0.4944	NN	0	0.0001
	723	KUE_T_2018	pLARmEB	Tdurum_contig42642_723	4A	737340693	-0.0003	13.8848	14.8754	0.0419	0.0506	AA	0	0.0001
	724	KUtE_T_2018	pLARmEB	GENE-4367_562	4A	742334680	-0.0002	4.9268	5.72	0.016	0.2865	TT	0	0.0001
	725	RL_T_2017	pLARmEB	Kukri_rep_c70151_173	4A	743948859	5.0334	4.0669	4.8218	15.5882	0.1986	CC	59.5647	107.424
	726	RL_C_2018	FASTmrMLM	wsnp_Ex_c7489_12810046	4A	743952014	-15.4806	7.5823	8.4632	32.9008	0.4775	NN	29.9338	86.267
	727	RL_C_2018	pLARmEB	wsnp_Ex_c7489_12810046	4A	743952014	-18.2924	11.7468	12.7188	33.5013	0.4775	NN	22.6434	86.267
	728	KUE_C_2018	FASTmrMLM	Kukri_c3866_718	4A	743952566	0.0004	6.285	7.1275	0.426	0.1685	TT	0	0
	729	KUtE_T_2018	pLARmEB	RAC875_c24030_136	4B	3733261	0.0009	6.1144	6.9513	0.0564	0.5	TC	0	0.0001
	730	CHL_14DAG_C_H	mrMLM	Tdurum_contig5427_314	4B	4852567	1.0159	3.1663	3.87201	9.4954	0.3621	C	4.7383	6.7055
	731	K_C_2017	mrMLM	Tdurum_contig10322_1908	4B	11911338	-17.0439	3.5301	4.25703	18.5057	0.092	A	377.576	572.308
	732	K_C_2017	pLARmEB	Tdurum_contig10322_1908	4B	11911338	-14.2343	3.7933	4.5344	8.7339	0.0899	AA	388.547	572.308
	733	KUpE_C_2017	mrMLM	Tdurum_contig10322_1908	4B	11911338	-0.0947	3.5301	4.25703	18.5057	0.092	A	0.0117	0.0177
	734	HI_T_2016	pLARmEB	BS00037094_51	4B	12893599	-2.9469	3.5545	4.2828	5.8957	0.3425	GG	50.1635	142.625
	735	SpL_C_2017	mrMLM	BS00011510_51	4B	16056666	-0.3629	3.7345	4.4725	10.6189	0.2069	A	0.3809	0.8283
	736	SpL_C_2017	FASTmrMLM	BS00011510_51	4B	16056666	-0.3338	5.6577	6.4788	8.6854	0.2022	AA	0.3978	0.8283
	737	KUtE_T_2018	FASTmrMLM	Kukri_c49506_396	4B	17044001	0.0003	4.7038	5.4877	0.0126	0.0562	CC	0.0001	0.0001
	738	KUtE_T_2018	pLARmEB	Kukri_c49506_396	4B	17044001	0.0003	5.4586	6.2724	0.0139	0.0562	CC	0	0.0001
	739	KUtE_C_2017	FASTmrMLM	wsnp_Ra_c9823_16313377	4B	22848678	-0.0016	7.0876	7.9547	0.9389	0.1573	GG	0	0.0001
	740	KUtE_T_2018	pLARmEB	IACX5762	4B	65946277	2.5726e-05	13.3516	14.3525	4.229e-05	0.0112	AA	0	0.0001
	741	Na+_C_2018	mrMLM	Tdurum_contig42038_1770	4B	144303432	-22.1636	3.0331	3.73047	25.6153	0.0632	C	247.897	509.913
	742	KUtE_C_2017	pLARmEB	Kukri_c52736_422	4B	446516808	-0.0004	6.3477	7.1922	0.028	0.0393	CC	0	0.0001
	743	LA_T_2016	pLARmEB	BS00072206_51	4B	545864964	-1.2759	3.5158	4.2419	3.389	0.3958	TC	4.3795	11.7197
	744	KUtE_T_2018	FASTmrMLM	BS00094557_51	4B	548120919	-0.0007	11.3407	12.3053	0.1891	0.1573	TT	0.0001	0.0001
	745	KUtE_T_2018	FASTmrMLM	Excalibur_c23403_1118	4B	549134603	-0.0008	10.8915	11.8476	0.3035	0.1629	AA	0.0001	0.0001
	746	KUtE_T_2018	FASTmrMLM	wsnp_CAP12_rep_c4278_1949864	4B	552018251	-0.0008	5.4146	6.2268	0.2465	0.1742	AA	0.0001	0.0001
	747	LA_C_2016	pLARmEB	Excalibur_c48668_341	4B	570242004	0.9241	3.284	3.9968	5.6234	0.4375	CC	6.4515	9.1241
	748	KUE_T_2017	pLARmEB	BS00068456_51	4B	570893141	-0.0004	15.0062	15.9546	0.4135	0.4944	AA	0	0
	749	KUE_C_2018	pLARmEB	BS00023035_51	4B	636917337	-0.0003	6.0328	6.8669	0.0623	0.1011	GG	0	0
	750	RL_C_2018	pLARmEB	Kukri_c7241_322	4B	637387883	3.4551	5.0785	5.8778	2.5309	0.0955	GG	22.6434	86.267
	751	Na+_T_2018	mrMLM	Kukri_c7241_322	4B	637387883	12.9142	3.126	3.82922	14.0264	0.0977	G	317.131	424.758
	752	PH_C_2018	pLARmEB	wsnp_Ex_rep_c67159_65649966	4B	637390195	2.9011	7.6123	8.4941	15.072	0.3371	TT	21.0452	45.1192
	753	SpL_C_2018	pLARmEB	BS00023179_51	4B	642946109	-0.1895	3.7447	4.4832	1.7041	0.3708	TT	0.3848	1.2931
	754	Na+_T_2017	FASTmrMLM	wsnp_Ex_c21293_30421496	4B	651991775	0.6324	3.3378	4.0538	5.7225	0.4382	CC	4.3144	6.58
	755	Na+_T_2017	pLARmEB	wsnp_Ex_c21293_30421496	4B	651991775	0.6324	3.3378	4.0538	5.6144	0.4382	CC	4.3145	6.58
	756	KUtE_C_2017	FASTmrMLM	Kukri_rep_c101259_81	4B	657274231	0.0006	4.6081	5.3878	0.2278	0.2978	TT	0	0.0001
	757	KUE_C_2017	FASTmrMLM	Kukri_rep_c101259_81	4B	657274231	0.0004	7.771	8.657	0.3723	0.2978	TT	0	0
	758	KUE_T_2017	pLARmEB	RAC875_c5802_144	4B	666049153	5.3507e-05	5.0644	5.8631	0.0054	0.1348	CC	0	0
	759	BY_T_2017	pLARmEB	BS00014101_51	4B	667685174	-0.8579	5.178	5.9812	9.2776	0.5	GG	0.6625	1.3418
	760	Na+_T_H	FASTmrMLM	wsnp_Ex_c19844_28855741	4B	670410114	2.5967	3.4035	4.1233	16.3496	0.4888	CC	9.9098	12.9274
	761	Na+_T_H	FASTmrEMMA	wsnp_Ex_c19844_28855741	4B	670410114	5.5614	4.2531	5.0169	9.3785	0.4888	CC	8.5308	12.9274
	762	Na+_T_H	pLARmEB	wsnp_Ex_c19844_28855741	4B	670410114	2.5743	3.0023	3.6977	16.7753	0.4888	CC	10.3062	12.9274
	763	KUtE_T_2017	FASTmrMLM	wsnp_BF145459D_Ta_2_1	4D	453220983	-0.0003	4.8372	5.6267	0.0257	0.0337	GG	0	0.0001
	764	KUE_T_2017	pLARmEB	wsnp_BF145459D_Ta_2_1	4D	453220983	-7.5517e-05	11.6395	12.6094	0.0025	0.0337	GG	0	0
	765	KUE_C_2018	FASTmrMLM	wsnp_BF145459D_Ta_2_1	4D	453220983	0.0002	14.9489	15.9546	0.0101	0.0337	GG	0	0
	766	KUE_C_2018	pLARmEB	wsnp_BF145459D_Ta_2_1	4D	453220983	0.0001	5.6214	6.4412	0.0056	0.0337	GG	0	0
	767	SW_T_H	FASTmrMLM	wsnp_BF145459D_Ta_2_1	4D	453220983	0.0005	10.7424	11.6956	0.0045	0.0337	GG	0.0003	0.001
	768	FW_C_H	mrMLM	Kukri_c4210_480	4D	455252702	0.0122	3.4242	4.14517	12.5555	0.3793	T	0.0002	0.0005
	769	KUE_C_H	mrMLM	Kukri_c4210_480	4D	455252702	0.204	3.4242	4.14517	12.5555	0.3793	T	0.0639	0.1318
	770	KUE_C_H	FASTmrMLM	Kukri_c4210_480	4D	455252702	0.1528	3.4494	4.1718	13.7478	0.3764	TC	0.0867	0.1318
	771	KUtE_C_H	FASTmrMLM	BS00064002_51	4D	455758780	-0.0006	4.1966	4.9577	0.0003	0.2753	AA	0.0939	0.1004
	772	RW_T_H	pLARmEB	Excalibur_rep_c109400_103	4D	461226413	-0.6823	5.2708	6.0776	6.9956	0.0562	CC	0.4896	1.1757
	773	Chl_C_2018	FASTmrMLM	RAC875_c47328_483	4D	494056241	1.4843	6.1772	7.0162	11.5752	0.309	CC	7.608	12.9157
	774	Chl_C_2018	pLARmEB	RAC875_c47328_483	4D	494056241	1.3863	5.5666	6.3844	11.0389	0.309	CC	8.0584	12.9157
	775	HI_T_2016	pLARmEB	BS00099534_51	5A	2646351	-2.7322	4.5789	5.3574	4.1644	0.4795	NN	50.1635	142.625
	776	KUtE_T_2018	pLARmEB	GENE-3324_338	5A	3521325	-0.0005	9.9726	10.9103	0.2037	0.4607	GG	0	0.0001
	777	RL_T_H	FASTmrEMMA	Excalibur_c6714_246	5A	6422240	-3.9242	3.9694	4.7195	9.966	0.382	CC	27.2863	35.6113
	778	FW_C_H	FASTmrMLM	BS00101071_51	5A	8059402	-0.001	3.7189	4.4561	0.2287	0.4944	AA	0.0001	0.0005
	779	RL_T_H	FASTmrMLM	BS00101071_51	5A	8059402	-1.9502	6.5007	7.3501	9.5613	0.4944	AA	17.5446	35.6113
	780	RL_T_H	pLARmEB	BS00101071_51	5A	8059402	-1.7814	5.6623	6.4836	7.8455	0.4944	AA	17.0923	35.6113
	781	RW_T_H	pLARmEB	BS00101071_51	5A	8059402	0.2455	5.2505	6.0565	3.602	0.4944	AA	0.4896	1.1757
	782	NA_T_H	mrMLM	BS00101071_51	5A	8059402	-64883.1	4.4452	5.21775	10.405	0.4943	A	1.47395e+10	3.19381e+10
	783	NA_T_H	FASTmrMLM	BS00101071_51	5A	8059402	-49585.7	4.4452	5.2178	7.1167	0.4944	AA	1.83575e+10	3.19381e+10
	784	FW_C_H	FASTmrMLM	wsnp_Ku_c9559_16000086	5A	8243590	-0.0009	5.4636	6.2776	0.1837	0.4045	CC	0.0001	0.0005
	785	KUE_T_2017	pLARmEB	BS00030991_51	5A	19268594	-6.0625e-05	7.2089	8.0795	0.0004	0.0112	CC	0	0
	786	KUtE_C_2018	pLARmEB	BS00030991_51	5A	19268594	-0.0002	11.897	12.8714	0.0009	0.0112	CC	0	0.0001
	787	KUE_C_2017	pLARmEB	Ku_c7910_1651	5A	20818412	3.1466e-05	14.3524	15.3525	0.0023	0.3315	TT	0	0
	788	Zn_T_2017	FASTmrMLM	BS00067940_51	5A	26470485	-3.2069	4.9763	5.7715	21.6368	0.1742	AA	20.1347	30.0386
	789	Zn_T_2017	pLARmEB	BS00067940_51	5A	26470485	-2.4322	3.4313	4.1527	15.8043	0.1742	AA	19.9421	30.0386
	790	KUtE_T_2018	pLARmEB	RAC875_c61887_194	5A	29892474	9.2763e-05	4.4976	5.2725	0.0011	0.0281	AA	0	0.0001
	791	KUtE_T_2018	pLARmEB	Excalibur_c5398_695	5A	30027274	-0.0028	8.8605	9.7736	5.2567	0.3989	GG	0	0.0001
	792	CHL_21DAG_T_H	FASTmrEMMA	IAAV4072	5A	42106400	1.7431	4.0026	4.7542	12.3526	0.3483	CC	4.0688	5.307
	793	FW_C_H	FASTmrMLM	wsnp_Ku_c644_1332610	5A	60117991	-0.0034	3.4717	4.1954	1.4979	0.1742	AA	0.0001	0.0005
	794	FW_T_H	FASTmrMLM	BS00078572_51	5A	69820486	-0.0021	3.7874	4.5282	1.5095	0.309	NN	0.0001	0.0003
	795	KUtE_T_H	FASTmrMLM	RAC875_rep_c114788_238	5A	146317696	0.2654	4.2954	5.0611	12.0344	0.1348	GG	0.1514	0.2473
	796	KUE_C_2018	pLARmEB	BS00078076_51	5A	409323859	-7.7457e-05	14.0051	15.0003	0.0039	0.0562	GG	0	0
	797	KUtE_T_2018	pLARmEB	BS00076256_51	5A	439419094	-0.0002	3.0539	3.7526	0.0013	0.0112	CC	0	0.0001
	798	KUpE_C_2017	pLARmEB	RAC875_rep_c110032_317	5A	466986066	-0.0013	3.0589	3.7579	0.0032	0.1854	TT	0.0103	0.0177
	799	TN_C_2017	FASTmrMLM	BS00003618_51	5A	482119825	-0.1678	5.3924	6.2038	9.0076	0.382	CC	0.1409	0.2951
	800	TN_C_2017	pLARmEB	BS00003618_51	5A	482119825	-0.1918	8.8448	9.7576	11.7715	0.382	CC	0.1613	0.2951
	801	KUtE_T_2017	pLARmEB	BS00069176_51	5A	485598276	-0.0006	10.3064	11.251	0.4089	0.2191	TT	0	0.0001
	802	KUE_T_2018	FASTmrMLM	BobWhite_c5540_416	5A	519905749	-0.0002	7.6018	8.4833	0.0379	0.1011	AA	0	0.0001
	803	KUtE_T_2018	pLARmEB	BS00043533_51	5A	521008349	5.8277e-05	3.7693	4.5091	0.0007	0.0393	GG	0	0.0001
	804	SW_T_H	FASTmrMLM	wsnp_Ku_c51039_56457361	5A	527917965	0.0003	4.1169	4.8742	0.0059	0.309	TT	0.0003	0.001
	805	BY_T_2016	mrMLM	RAC875_c61597_406	5A	528603818	-1.9364	4.0155	4.76783	18.9174	0.0282	G	2.0816	2.7023
	806	KUE_T_2018	FASTmrMLM	BobWhite_c2715_411	5A	533291115	-0.0005	3.1686	3.8744	0.1807	0.1292	AA	0	0.0001
	807	RW_C_H	FASTmrMLM	wsnp_CAP11_c1740_947838	5A	536677286	-0.525	3.6448	4.378	8.1	0.4101	AA	1.2747	2.1234
	808	RW_C_H	FASTmrEMMA	wsnp_CAP11_c1740_947838	5A	536677286	-1.1225	4.0983	4.8547	8.1886	0.4101	AA	1.3944	2.1234
	809	RW_C_H	pLARmEB	wsnp_CAP11_c1740_947838	5A	536677286	-0.5243	3.1303	3.8338	7.2296	0.4101	AA	1.2743	2.1234
	810	KUE_T_2017	pLARmEB	wsnp_Ex_c7487_12808011	5A	536677423	0.0002	7.9086	8.7982	0.077	0.4494	TT	0	0
	811	KUE_T_2018	pLARmEB	BobWhite_rep_c57159_360	5A	536677525	-0.0008	11.1591	12.1202	0.3596	0.0618	AA	0	0.0001
	812	KUE_T_2018	FASTmrMLM	RAC875_c103967_76	5A	537354458	-0.0003	6.7271	7.5835	0.0241	0.0449	AA	0	0.0001
	813	KUE_T_2018	pLARmEB	RAC875_c103967_76	5A	537354458	-0.0004	3.7393	4.4775	0.0521	0.0449	AA	0	0.0001
	814	Chl_T_2018	pLARmEB	wsnp_Ex_c12678_20148981	5A	538757231	2.3162	3.4524	4.175	3.6421	0.1292	GG	20.5111	35.9326
	815	KUtE_C_2018	pLARmEB	Kukri_c20258_143	5A	540613173	0.0006	6.3655	7.2106	0.1529	0.1404	GG	0	0.0001
	816	Chl_T_2018	FASTmrMLM	Excalibur_rep_c68708_80	5A	547173318	4.1806	4.6417	5.4229	16.045	0.0787	TT	25.7743	35.9326
	817	PH_T_2017	mrMLM	wsnp_Ex_c18941_27840714	5A	547647410	3.0894	4.4685	5.2421	17.3346	0.1954	C	19.2139	34.5645
	818	PH_T_2017	FASTmrMLM	wsnp_Ex_c18941_27840714	5A	547647410	2.5569	4.9937	5.7896	12.7033	0.191	CC	18.8529	34.5645
	819	PH_T_2017	pLARmEB	wsnp_Ex_c18941_27840714	5A	547647410	2.7187	7.3802	8.2556	6.9379	0.191	CC	14.2695	34.5645
	820	KUE_T_2018	FASTmrMLM	Ex_c21738_1175	5A	549356101	0.0004	3.0202	3.7167	0.2371	0.3146	GG	0	0.0001
	821	KUE_T_2018	pLARmEB	Ex_c21738_1175	5A	549356101	0.0005	4.0352	4.7885	0.4484	0.3146	GG	0	0.0001
	822	BY_C_2018	FASTmrMLM	BS00065551_51	5A	556531640	-1.0782	3.6202	4.3521	8.4635	0.0674	CC	2.7289	3.4546
	823	BY_C_2018	pLARmEB	BS00065551_51	5A	556531640	-1.0795	4.2624	5.0266	7.7135	0.0674	CC	2.7281	3.4546
	824	FW_T_H	pLARmEB	RAC875_rep_c91682_90	5A	558689050	0.0003	5.9021	6.7318	0.0159	0.1966	TT	0.0001	0.0003
	825	RL_T_H	pLARmEB	Excalibur_c45297_316	5A	571784880	1.3959	3.3709	4.0888	3.5865	0.2191	CC	17.0923	35.6113
	826	KUE_T_2018	FASTmrMLM	BobWhite_c14028_182	5A	571789596	-0.0012	11.1176	12.078	1.5449	0.191	AA	0	0.0001
	827	KUtE_T_2017	FASTmrMLM	Ex_c27046_1546	5A	574750070	-0.0006	7.9653	8.8564	0.0585	0.0337	CC	0	0.0001
	828	K_C_2018	pLARmEB	BS00074301_51	5A	578061478	-8.8334	3.1863	3.8932	7.1485	0.4888	AA	875.98	1060.55
	829	KUpE_C_2018	pLARmEB	BS00074301_51	5A	578061478	-0.06	4.8218	5.6106	10.6958	0.4888	AA	0.0252	0.0327
	830	CHL_B_T_2017	FASTmrMLM	Excalibur_rep_c103747_193	5A	584614232	-0.0003	3.5398	4.2673	1.7901e-06	0.4607	CC	3.4519	3.4913
	831	KUE_T_2018	FASTmrMLM	BobWhite_c14689_172	5A	616879604	0.0003	4.09	4.846	0.161	0.2697	AA	0	0.0001
	832	RL_T_H	mrMLM	BobWhite_rep_c63332_67	5A	677845660	2.3125	3.8402	4.5837	11.7083	0.3391	C	23.6386	35.6113
	833	RL_T_H	FASTmrMLM	BobWhite_rep_c63332_67	5A	677845660	1.8046	4.8762	5.6673	6.9217	0.3539	CC	17.5446	35.6113
	834	RL_T_H	pLARmEB	BobWhite_rep_c63332_67	5A	677845660	1.9239	5.5186	6.3347	7.7367	0.3539	CC	17.0923	35.6113
	835	RW_T_H	pLARmEB	BS00022299_51	5A	679740078	-0.254	5.9339	6.7647	3.7729	0.4438	CC	0.4896	1.1757
	836	KUtE_T_2018	pLARmEB	wsnp_CAP11_c1116_654975	5A	684939687	-0.0003	6.8149	7.6739	0.0779	0.3539	GG	0	0.0001
	837	RL_T_2017	mrMLM	Ra_c11529_647	5A	685557599	-6.9149	4.739	5.52436	22.9025	0.1479	G	57.1283	107.424
	838	RL_T_2017	FASTmrMLM	Ra_c11529_647	5A	685557599	-5.8717	4.3731	5.1424	17.6337	0.1438	GG	66.0556	107.424
	839	RL_T_2017	pLARmEB	Ra_c11529_647	5A	685557599	-5.5792	4.9163	5.709	12.1905	0.1438	GG	59.5647	107.424
	840	KUtE_T_2017	pLARmEB	Ra_c11529_647	5A	685557599	0.0005	11.7293	12.7008	0.1792	0.1629	GG	0	0.0001
	841	FW_T_H	pLARmEB	Excalibur_c12246_766	5A	693632043	0.0006	4.2609	5.025	0.0805	0.2191	AA	0.0001	0.0003
	842	DM_C_2018	FASTmrMLM	wsnp_Ku_c16354_25219645	5A	698359148	1.2036	3.6961	4.4321	6.8405	0.191	CC	7.6177	12.7866
	843	DM_C_2018	pLARmEB	wsnp_Ku_c16354_25219645	5A	698359148	1.2038	3.6961	4.4321	2.2465	0.191	CC	7.6171	12.7866
	844	DM_T_2018	pLARmEB	wsnp_Ku_c16354_25219645	5A	698359148	1.4792	3.8504	4.5944	3.4544	0.191	CC	8.5267	18.4308
	845	KUE_T_2017	pLARmEB	Kukri_c16087_281	5A	702166101	0.0002	9.3266	10.2504	0.1094	0.3034	GG	0	0
	846	KUtE_C_2018	pLARmEB	Tdurum_contig12204_1131	5A	705442972	9.9065e-05	4.7613	5.5476	0.001	0.0281	GG	0	0.0001
	847	KUE_T_2018	pLARmEB	Tdurum_contig12204_1131	5A	705442972	0.0002	13.4127	14.4105	0.0101	0.0281	GG	0	0.0001
	848	K_C_2017	mrMLM	Ku_c10387_272	5B	232178	-28.8638	4.5227	5.2987	25.98	0.0402	T	377.576	572.308
	849	K_C_2017	FASTmrMLM	Ku_c10387_272	5B	232178	-26.7328	4.7291	5.514	24.5286	0.0393	TT	466.367	572.308
	850	KUpE_C_2017	mrMLM	Ku_c10387_272	5B	232178	-0.1604	4.5227	5.2987	25.98	0.0402	T	0.0117	0.0177
	851	KUE_T_2018	FASTmrMLM	Ku_c10387_272	5B	232178	-0.0007	3.9155	4.6628	0.1632	0.0393	TT	0	0.0001
	852	KUE_T_2018	pLARmEB	Ku_c10387_272	5B	232178	-0.0008	3.931	4.6791	0.2004	0.0393	TT	0	0.0001
	853	FW_T_H	FASTmrMLM	RAC875_c39204_91	5B	6852691	0.0003	3.2174	3.9262	0.0032	0.0225	GG	0.0001	0.0003
	854	HI_C_2017	pLARmEB	BS00080746_51	5B	14191702	-0.0266	5.0605	5.8591	1.3649	0.4888	NN	0.002	0.0046
	855	KUtE_T_2017	pLARmEB	RAC875_rep_c114631_389	5B	16034591	-0.0012	10.5961	11.5464	1.8925	0.4775	CC	0	0.0001
	856	GpS_T_2016	FASTmrMLM	Ku_c11233_1371	5B	17942172	-2.2043	3.109	3.8112	6.855	0.2877	CC	37.4218	59.6933
	857	GpS_T_2016	pLARmEB	Ku_c11233_1371	5B	17942172	-2.2043	3.109	3.8112	6.8554	0.2877	CC	37.4218	59.6933
	858	Na+_C_2018	pLARmEB	RAC875_c33933_350	5B	20671175	-8.8797	6.0881	6.9241	9.6732	0.2978	AA	269.54	509.913
	859	SpL_C_2018	FASTmrMLM	Excalibur_c13536_202	5B	34039822	-0.687	4.7247	5.5095	10.5801	0.073	AA	0.7264	1.2931
	860	SpL_C_2018	pLARmEB	Excalibur_c13536_202	5B	34039822	-0.6575	6.461	7.3091	5.9653	0.073	AA	0.3848	1.2931
	861	KUE_C_2018	FASTmrMLM	Excalibur_c13536_202	5B	34039822	-0.0002	11.4679	12.4348	0.0189	0.073	AA	0	0
	862	KUE_C_2017	pLARmEB	Kukri_c10017_833	5B	44877879	0.0003	4.1972	4.9583	0.1698	0.3708	TT	0	0
	863	KUtE_T_2017	pLARmEB	Kukri_c2827_439	5B	53662672	-0.0007	7.5741	8.4548	0.6424	0.4831	GG	0	0.0001
	864	KUtE_T_2017	FASTmrMLM	RAC875_c45619_224	5B	64733088	-0.0002	3.8078	4.5496	0.0074	0.0169	CC	0	0.0001
	865	KUtE_T_2017	pLARmEB	RAC875_c45619_224	5B	64733088	-8.8351e-05	12.2149	13.1949	0.0013	0.0169	CC	0	0.0001
	866	KUE_T_2017	pLARmEB	RAC875_c45619_224	5B	64733088	-0.0001	3.2149	3.9236	0.0037	0.0169	CC	0	0
	867	KUE_C_2018	FASTmrMLM	RAC875_c45619_224	5B	64733088	-0.0001	5.0989	5.899	0.0053	0.0169	CC	0	0
	868	KUtE_T_2017	pLARmEB	BobWhite_c4852_323	5B	68358991	-0.0002	9.0182	9.935	0.0127	0.0674	GG	0	0.0001
	869	Zn_T_2017	FASTmrMLM	Excalibur_c7286_975	5B	72099969	2.4761	5.7416	6.5657	15.5922	0.3933	GG	20.1347	30.0386
	870	Zn_T_2017	pLARmEB	Excalibur_c7286_975	5B	72099969	2.2318	5.0072	5.8036	16.0851	0.3933	GG	19.9421	30.0386
	871	Na+_C_2018	pLARmEB	wsnp_Ex_c13496_21243167	5B	74999804	8.179	6.0019	6.835	10.4161	0.427	GG	269.54	509.913
	872	Na+_T_H	FASTmrEMMA	BS00067072_51	5B	80262345	-2.1679	3.7463	4.4849	7.8347	0.4719	GG	8.5308	12.9274
	873	CHL_14DAG_C_H	FASTmrMLM	GENE-3524_397	5B	86255892	0.8225	3.1136	3.816	8.1511	0.264	GG	3.9901	6.7055
	874	Na+_T_H	pLARmEB	Kukri_c13224_551	5B	87230015	-0.9089	3.18	3.8865	6.2541	0.4157	AA	10.3062	12.9274
	875	KUtE_C_2017	FASTmrMLM	Ku_c32395_173	5B	176580625	-0.0015	9.5173	10.4453	0.3376	0.0506	CC	0	0.0001
	876	GpS_T_2017	FASTmrMLM	BS00007437_51	5B	289566999	-0.0002	4.1943	4.9553	6.2171e-08	0.3146	GG	28.0035	28.3221
	877	KUtE_C_2018	pLARmEB	wsnp_Ex_rep_c66881_65284662	5B	342873656	-0.0003	5.789	6.6148	0.0783	0.3483	AA	0	0.0001
	878	KUtE_C_2018	pLARmEB	BobWhite_c45340_368	5B	404184146	0.0003	4.8199	5.6087	0.0823	0.1798	TT	0	0.0001
	879	NA_T_H	mrMLM	RFL_Contig3192_1291	5B	422940237	64035	4.0986	4.85499	10.1245	0.4828	G	1.47395e+10	3.19381e+10
	880	NA_T_H	FASTmrMLM	RFL_Contig3192_1291	5B	422940237	48936.5	4.0986	4.855	6.9246	0.4719	GG	1.83575e+10	3.19381e+10
	881	CHL_H_C_2017	FASTmrMLM	Tdurum_contig41335_181	5B	473637784	1.0065	3.1173	3.82	13.1203	0.3876	AC	4.933	6.7807
	882	BY_C_2016	pLARmEB	wsnp_Ex_c2615_4862266	5B	475586840	0.7851	7.5825	8.4635	12.5313	0.1644	CC	0.9318	2.0545
	883	RL_C_2018	mrMLM	RFL_Contig4751_1197	5B	482291047	16.2251	6.3467	7.19118	18.2644	0.0172	T	36.3012	86.267
	884	TKW_T_2016	mrMLM	GENE-3437_68	5B	489280596	-2.4283	3.4337	4.15521	15.851	0.3873	T	21.1825	30.899
	885	TKW_T_2016	FASTmrMLM	GENE-3437_68	5B	489280596	-1.4883	3.0148	3.711	6.1217	0.3767	TT	22.4712	30.899
	886	CHL_14DAG_C_H	FASTmrMLM	BS00065313_51	5B	489845842	-0.8071	3.7802	4.5206	8.0346	0.2753	GG	3.9901	6.7055
	887	CHL_14DAG_C_H	FASTmrEMMA	BS00065313_51	5B	489845842	-1.6786	4.0492	4.8031	8.0292	0.2753	GG	3.834	6.7055
	888	KUtE_C_2018	pLARmEB	BobWhite_c33990_190	5B	508258221	0.002	13.7881	14.8085	3.1061	0.3427	NN	0	0.0001
	889	KUtE_T_2018	pLARmEB	Kukri_c34340_391	5B	508778825	-0.0002	7.9655	8.8566	0.0008	0.0112	CC	0	0.0001
	890	SpL_T_2017	mrMLM	BS00010033_51	5B	509487576	0.8313	3.7104	4.44712	7.5039	0.477	C	0.3071	0.7225
	891	CHL_T_2016	mrMLM	BobWhite_c6633_395	5B	531599374	-16.4162	5.1422	5.94398	60.1873	0.4859	C	19.0005	26.2812
	892	CHL_T_2016	FASTmrMLM	BobWhite_c6633_395	5B	531599374	-15.503	6.7907	7.649	55.485	0.4863	NN	16.3436	26.2812
	893	CHL_T_2016	pLARmEB	BobWhite_c6633_395	5B	531599374	-15.5031	6.7907	7.649	53.3684	0.4863	NN	16.3434	26.2812
	894	KUtE_C_2018	pLARmEB	BobWhite_c6633_395	5B	531599374	-0.0041	4.1229	4.8805	1.1963	0.4888	NN	0	0.0001
	895	KUtE_T_2017	pLARmEB	Ku_c2346_1339	5B	536515270	0.0005	8.6192	9.5266	0.1006	0.0506	TT	0	0.0001
	896	KUE_C_2018	FASTmrMLM	Ku_c2346_1339	5B	536515270	0.0002	8.4331	9.336	0.026	0.0506	TT	0	0
	897	KUE_C_2018	pLARmEB	Ku_c2346_1339	5B	536515270	0.0001	15.0691	15.9546	0.0094	0.0506	TT	0	0
	898	FW_T_H	FASTmrMLM	wsnp_Ex_c3834_6971712	5B	536516487	-0.0013	5.7368	6.5607	0.1044	0.0449	AA	0.0001	0.0003
	899	KUtE_C_2017	pLARmEB	Tdurum_contig10210_428	5B	550728917	0.0004	11.8592	12.833	0.0241	0.0562	AA	0	0.0001
	900	KUE_T_2018	FASTmrMLM	BS00076169_51	5B	555179293	-0.0004	3.0358	3.7333	0.0176	0.0393	AA	0	0.0001
	901	KUtE_C_2017	pLARmEB	BS00029915_51	5B	558346572	0.0011	5.2551	6.0613	0.0765	0.0281	AA	0	0.0001
	902	KUE_T_2018	FASTmrMLM	BS00029915_51	5B	558346572	-0.0003	5.7685	6.5935	0.0113	0.0281	AA	0	0.0001
	903	CHL_B_T_2017	FASTmrEMMA	BS00067331_51	5B	562968816	0.9919	3.1448	3.8492	6.5662	0.3933	CC	2.8093	3.4913
	904	CHL_21DAG_C_H	FASTmrEMMA	BS00010311_51	5B	562969783	1.9586	3.8669	4.6117	10.0144	0.3764	TT	5.5908	8.0229
	905	PH_C_2016	FASTmrMLM	Tdurum_contig42008_7461	5B	566968394	2.439	3.9633	4.713	9.5534	0.411	GG	32.9174	58.7275
	906	PH_C_2016	FASTmrEMMA	Tdurum_contig42008_7461	5B	566968394	5.3519	4.25	5.0136	11.8064	0.411	GG	35.5433	58.7275
	907	PH_C_2016	pLARmEB	Tdurum_contig42008_7461	5B	566968394	2.453	3.5386	4.266	9.9212	0.411	GG	38.1554	58.7275
	908	KUtE_T_2017	pLARmEB	IAAV1888	5B	586352242	-0.0003	5.7644	6.5893	0.0858	0.1011	AG	0	0.0001
	909	KUE_T_2018	pLARmEB	Kukri_c5685_1066	5B	587471540	-0.0004	4.8072	5.5954	0.0727	0.118	TT	0	0.0001
	910	KUtE_T_2018	pLARmEB	Excalibur_c100531_251	5B	591108072	-0.0008	6.335	7.1791	0.2128	0.1854	GG	0	0.0001
	911	KUE_T_2017	pLARmEB	Ra_c2216_1442	5B	591145277	0.0002	4.213	4.9749	0.0241	0.0899	AA	0	0
	912	KUtE_C_2018	pLARmEB	Tdurum_contig50731_961	5B	617709959	-0.0006	13.852	14.8754	0.1187	0.0899	TT	0	0.0001
	913	KUE_T_2018	pLARmEB	Tdurum_contig97407_196	5B	647940863	0.0002	14.1002	15.1095	0.0166	0.0393	TT	0	0.0001
	914	K_T_H	mrMLM	BS00064272_51	5B	656713538	7.7937	3.3228	4.0379	13.4822	0.2184	A	205.058	273.641
	915	K_T_H	FASTmrMLM	BS00064272_51	5B	656713538	6.2268	4.432	5.204	9.1445	0.236	AA	206.204	273.641
	916	K_T_H	pLARmEB	BS00064272_51	5B	656713538	4.8053	3.4233	4.1442	5.446	0.236	AA	197.208	273.641
	917	KUpE_T_H	mrMLM	BS00064272_51	5B	656713538	0.2598	3.3228	4.0379	13.4822	0.2184	A	0.2278	0.304
	918	KUpE_T_H	FASTmrMLM	BS00064272_51	5B	656713538	0.2048	5.6728	6.4944	8.9069	0.236	AA	0.2302	0.304
	919	RL_T_2018	pLARmEB	BS00050057_51	5B	658370071	3.7533	3.9212	4.6688	6.3852	0.3034	TT	112.98	152.233
	920	Na+_T_2017	mrMLM	Tdurum_contig8210_317	5B	669483487	0.9544	5.3557	6.16569	9.0809	0.2299	G	4.6961	6.58
	921	GY_T_2017	mrMLM	RAC875_rep_c111379_703	5B	669550549	-0.2367	4.3521	5.12043	9.6349	0.2701	A	0.202	0.3102
	922	GY_T_2017	FASTmrMLM	RAC875_rep_c111379_703	5B	669550549	-0.1867	5.2276	6.0327	6.2041	0.264	AA	0.2076	0.3102
	923	KUE_T_2017	mrMLM	RAC875_rep_c111379_703	5B	669550549	-0.002	3.3884	4.10731	8.608	0.2701	A	0	0
	924	KUE_T_2017	FASTmrMLM	RAC875_rep_c111379_703	5B	669550549	-0.002	6.2576	7.0992	8.3253	0.264	AA	0	0
	925	HI_T_2017	FASTmrMLM	BS00024814_51	5B	671301187	-1.306e-05	4.2648	5.0291	1.0501e-06	0.3876	GG	0.0108	0.0155
	926	HI_T_2017	FASTmrMLM	wsnp_CAP12_c2231_1090724	5B	672594804	-0.0308	5.4461	6.2595	5.8274	0.4607	CC	0.0108	0.0155
	927	KUtE_T_2017	pLARmEB	wsnp_JD_c8978_9893945	5B	679347089	-0.0014	14.0518	15.0515	1.9011	0.1685	CC	0	0.0001
	928	KUpE_C_2018	pLARmEB	wsnp_BE403214B_Ta_2_1	5B	682170497	0.0276	3.9748	4.7251	2.2025	0.3596	GG	0.0252	0.0327
	929	PH_T_2016	pLARmEB	Kukri_c67054_123	5B	684612598	-3.4642	3.653	4.3867	6.9413	0.3219	GG	62.1009	108.48
	930	PH_T_2016	mrMLM	Excalibur_c9543_1268	5B	685637179	-11.8898	4.9318	5.72517	46.4606	0.0845	C	64.3809	108.48
	931	PH_T_2016	FASTmrMLM	Excalibur_c9543_1268	5B	685637179	-8.3969	3.0719	3.7717	31.3214	0.0822	CC	67.1097	108.48
	932	KUE_T_2018	FASTmrMLM	Excalibur_c54637_123	5B	689375749	-0.0004	10.1571	11.0986	0.0564	0.0506	AA	0	0.0001
	933	KUE_T_2018	pLARmEB	Excalibur_c54637_123	5B	689375749	-0.0002	9.1727	10.093	0.0214	0.0506	AA	0	0.0001
	934	FW_T_H	pLARmEB	Ra_c3287_1405	5B	695492536	-0.0076	9.9672	10.9048	7.9767	0.1011	CC	0.0001	0.0003
	935	KUE_T_H	FASTmrMLM	Ra_c3287_1405	5B	695492536	-0.3625	3.6391	4.372	18.6432	0.1011	CC	0.2676	0.319
	936	KUE_T_2018	pLARmEB	Ku_c10913_2542	5B	695778572	0.0003	6.8069	7.6657	0.0852	0.1517	AA	0	0.0001
	937	KUE_C_2018	FASTmrMLM	RAC875_c65269_290	5B	702624831	-7.5221e-05	6.5646	7.416	0.0143	0.2528	GG	0	0
	938	DM_C_2017	mrMLM	Kukri_c13359_169	5B	702741002	-1.2535	3.3564	4.07346	12.8876	0.3908	C	6.7323	11.0976
	939	TKW_C_2016	FASTmrMLM	Ku_c36367_203	5B	704240059	-2.3713	4.4411	5.2135	13.9753	0.1918	GG	18.9186	27.3688
	940	KUtE_T_2018	pLARmEB	RAC875_c37988_243	5B	712851517	-0.0002	6.0668	6.9021	0.019	0.2191	TT	0	0.0001
	941	KUE_C_2017	FASTmrMLM	JG_c1426_201	5B	712907184	-0.0002	3.8401	4.5836	0.0079	0.0169	CC	0	0
	942	KUE_C_2017	pLARmEB	JG_c1426_201	5B	712907184	-0.0001	11.8037	12.7765	0.0025	0.0169	CC	0	0
	943	PH_C_2018	mrMLM	Kukri_c9358_269	5D	9732395	3.4339	4.102	4.85856	13.613	0.1322	C	30.7549	45.1192
	944	PH_C_2018	pLARmEB	Kukri_c9358_269	5D	9732395	3.9159	7.0023	7.8669	19.0507	0.1292	CC	21.0452	45.1192
	945	FW_T_H	FASTmrMLM	Kukri_c9358_269	5D	9732395	7.0046e-05	5.7762	6.6015	0.001	0.1292	CC	0.0001	0.0003
	946	FW_T_H	pLARmEB	Kukri_c9358_269	5D	9732395	0.0001	3.6227	4.3547	0.0019	0.1292	CC	0.0001	0.0003
	947	BY_T_2017	mrMLM	wsnp_Ku_rep_c72922_72561803	5D	123499828	-3.1023	3.5758	4.30526	14.3063	0.0057	C	0.5311	1.3418
	948	TN_C_2018	FASTmrMLM	CAP8_c8456_75	5D	143783285	-0.3896	3.9859	4.7368	10.4488	0.1067	AA	0.4063	0.6647
	949	TN_C_2018	pLARmEB	CAP8_c8456_75	5D	143783285	-0.3988	3.9375	4.6859	8.5129	0.1067	AA	0.2965	0.6647
	950	KUtE_C_2017	FASTmrMLM	wsnp_JD_c43684_30430706	5D	188335587	0.0005	3.6225	4.3545	0.0246	0.0393	TT	0	0.0001
	951	KUtE_C_2017	pLARmEB	wsnp_JD_c43684_30430706	5D	188335587	0.0004	5.2208	6.0256	0.0182	0.0393	TT	0	0.0001
	952	KUE_C_2017	FASTmrMLM	Kukri_c13045_302	5D	241250946	0.0004	4.465	5.2384	0.0794	0.0449	CC	0	0
	953	CHL_H_C_2017	mrMLM	Kukri_rep_c73094_348	5D	278625785	-2.8948	3.9946	4.7459	15.2257	0.0287	C	4.772	6.7807
	954	KUE_C_2018	pLARmEB	wsnp_Ex_c14182_22122844	5D	320888516	0.0006	6.9913	7.8556	0.7121	0.3539	TT	0	0
	955	KUtE_T_2018	pLARmEB	Kukri_c805_325	5D	386652270	-0.0008	13.1208	14.1157	0.4651	0.4382	GG	0	0.0001
	956	KUE_T_2018	pLARmEB	Kukri_c805_325	5D	386652270	-0.0009	7.9924	8.8842	1.3191	0.4382	GG	0	0.0001
	957	KUtE_T_2018	FASTmrMLM	RAC875_c20530_1159	5D	478466774	-0.0001	6.8053	7.664	0.0014	0.0225	TT	0.0001	0.0001
	958	KUtE_T_2018	pLARmEB	RAC875_c20530_1159	5D	478466774	-8.7757e-05	6.9813	7.8453	0.0007	0.0225	TT	0	0.0001
	959	RL_T_H	pLARmEB	RAC875_c9038_1374	5D	486170386	2.2471	3.3467	4.0632	5.8259	0.1124	AA	17.0923	35.6113
	960	NA_T_H	mrMLM	RAC875_c9038_1374	5D	486170386	91862.3	3.5031	4.22853	9.7333	0.1149	A	1.47395e+10	3.19381e+10
	961	NA_T_H	FASTmrMLM	RAC875_c9038_1374	5D	486170386	70403.8	3.5031	4.2285	6.6953	0.1124	AA	1.83575e+10	3.19381e+10
	962	Na+_T_2017	FASTmrMLM	RAC875_c9038_1374	5D	486170386	-1.2946	4.375	5.1444	11.8508	0.1124	AA	4.3144	6.58
	963	Na+_T_2017	pLARmEB	RAC875_c9038_1374	5D	486170386	-1.2946	4.375	5.1444	11.6266	0.1124	AA	4.3145	6.58
	964	KUE_T_2018	FASTmrMLM	BS00064691_51	5D	496067069	-0.0005	3.5182	4.2445	0.1291	0.073	TT	0	0.0001
	965	DM_C_2017	pLARmEB	BobWhite_c2730_245	5D	507775697	1.4984	4.085	4.8407	8.7655	0.118	CC	7.0788	11.0976
	966	KUE_C_2017	pLARmEB	BS00066224_51	5D	526451415	0.0003	9.6421	10.5728	0.1215	0.1292	GG	0	0
	967	KUtE_C_2018	pLARmEB	BS00089078_51	5D	549579051	0.0017	7.3394	8.2136	2.2482	0.4382	CC	0	0.0001
	968	RL_T_H	mrMLM	wsnp_Ex_c11619_18714738	5D	552039988	2.9051	3.7672	4.50692	14.6799	0.1724	T	23.6386	35.6113
	969	RL_T_H	FASTmrEMMA	wsnp_Ex_c11619_18714738	5D	552039988	5.3147	3.8722	4.6174	9.3328	0.1685	TT	27.2863	35.6113
	970	TKW_T_2017	FASTmrMLM	IACX7488	5D	554472630	-2.098	4.4838	5.2581	11.9079	0.1292	GG	11.2489	17.2984
	971	TKW_T_2017	pLARmEB	JD_c48734_1188	5D	555357698	4.1353	3.9987	4.7502	23.9347	0.4551	AC	11.6758	17.2984
	972	PH_C_2017	FASTmrMLM	tplb0026a09_1531	5D	562341050	-3.3351	3.8338	4.577	17.5755	0.2303	CC	39.3157	50.492
	973	LA_C_2016	FASTmrMLM	wsnp_Ra_rep_c69602_67107375	6A	1494869	-2.5283	4.0896	4.8456	21.4068	0.0625	NN	6.6505	9.1241
	974	LA_C_2016	pLARmEB	wsnp_Ra_rep_c69602_67107375	6A	1494869	-2.4844	4.0171	4.7695	13.4574	0.0625	NN	6.4515	9.1241
	975	LA_T_2016	mrMLM	wsnp_Ra_rep_c69602_67107375	6A	1494869	-2.898	4.2955	5.06122	21.6169	0.0571	A	4.8203	11.7197
	976	LA_T_2016	FASTmrMLM	wsnp_Ra_rep_c69602_67107375	6A	1494869	-2.7394	4.6492	5.4307	19.5584	0.0625	NN	6.4356	11.7197
	977	LA_T_2016	pLARmEB	wsnp_Ra_rep_c69602_67107375	6A	1494869	-1.9598	3.0977	3.7992	3.2574	0.0625	NN	4.3795	11.7197
	978	KUtE_T_2018	pLARmEB	Excalibur_c16376_351	6A	4769490	0.0007	13.5621	14.5566	0.18	0.4157	AG	0	0.0001
	979	KUE_C_2017	FASTmrMLM	BS00063903_51	6A	11499657	0.0012	4.8148	5.6033	0.6619	0.4045	TT	0	0
	980	KUE_C_2018	FASTmrMLM	Ex_c2978_643	6A	12387144	9.6043e-05	13.3116	14.3111	0.0187	0.3596	AA	0	0
	981	KUtE_C_2018	pLARmEB	Excalibur_c64989_250	6A	12392149	0.0013	5.8304	6.6576	1.2647	0.3315	CC	0	0.0001
	982	KUE_C_2018	FASTmrMLM	Excalibur_c64989_250	6A	12392149	0.0011	13.7354	14.7505	3.0442	0.3315	CC	0	0
	983	KUE_C_2018	pLARmEB	Excalibur_c64989_250	6A	12392149	0.0005	7.5175	8.3967	0.5355	0.3315	CC	0	0
	984	FW_T_H	FASTmrMLM	Kukri_rep_c69659_71	6A	13074556	-0.0002	7.0557	7.9219	0.007	0.1292	AA	0.0001	0.0003
	985	FW_T_H	FASTmrMLM	wsnp_Ex_rep_c68165_66935041	6A	13074979	-0.0005	4.7287	5.5136	0.0491	0.0955	TT	0.0001	0.0003
	986	SL_T_H	mrMLM	wsnp_Ex_c52849_56297163	6A	13076345	-1.8855	5.0635	5.86217	15.0137	0.1034	G	4.0911	8.3768
	987	SL_C_H	pLARmEB	wsnp_Ku_rep_c69659_69084797	6A	13076478	-1.5476	3.7967	4.538	3.0078	0.1348	GG	6.6	13.692
	988	FW_T_H	FASTmrMLM	wsnp_Ku_rep_c69659_69084797	6A	13076478	-0.0007	12.876	13.8682	0.092	0.1348	GG	0.0001	0.0003
	989	SL_T_H	pLARmEB	wsnp_Ku_rep_c69659_69084797	6A	13076478	-1.2636	3.7341	4.4721	5.5358	0.1348	GG	4.7007	8.3768
	990	TN_C_2017	FASTmrMLM	Excalibur_c49745_628	6A	18464388	0.2191	4.544	5.3209	8.1148	0.1348	GG	0.1409	0.2951
	991	TN_C_2017	pLARmEB	Excalibur_c49745_628	6A	18464388	0.1656	5.4685	6.2827	4.6343	0.1348	GG	0.1613	0.2951
	992	BY_T_2017	mrMLM	GENE-4142_882	6A	20767997	-1.3737	7.8031	8.68996	13.3873	0.046	T	0.5311	1.3418
	993	BY_T_2017	FASTmrMLM	GENE-4142_882	6A	20767997	-0.9702	4.6429	5.4242	8.5462	0.0449	TT	0.6519	1.3418
	994	KUtE_T_2018	pLARmEB	BS00065500_51	6A	22969150	0.0066	6.4127	7.2593	1.4061	0.4944	NN	0	0.0001
	995	NA_C_H	mrMLM	Kukri_c7458_1332	6A	23722752	3.6219	6.9528	7.81594	33.9611	0.1609	A	6.8329	16.5406
	996	Na+_C_H	mrMLM	Kukri_c7458_1332	6A	23722752	3.6219	6.9528	7.81594	33.9611	0.1609	A	6.8329	16.5406
	997	Na+_T_2018	FASTmrMLM	wsnp_Ex_c1050_2008559	6A	24771504	6.7652	3.7079	4.4445	7.5203	0.2809	TT	288.182	424.758
	998	Na+_T_2018	FASTmrEMMA	wsnp_Ex_c1050_2008559	6A	24771504	13.5481	3.2686	3.9805	8.7288	0.2809	TT	370.763	424.758
	999	KUE_C_2018	FASTmrMLM	wsnp_JD_c3441_4455541	6A	24829659	5.2356e-05	4.5995	5.3789	0.007	0.3989	AA	0	0
	1000	KUE_C_2018	pLARmEB	wsnp_JD_c3441_4455541	6A	24829659	-1.1062e-05	5.1128	5.9134	0.0003	0.3989	AA	0	0
	1001	KUtE_T_2018	pLARmEB	wsnp_Ex_c15378_23638822	6A	49193147	0.0002	10.5377	11.4869	0.0338	0.2978	CC	0	0.0001
	1002	SpL_C_2017	mrMLM	wsnp_Ex_c15378_23639387	6A	49195242	0.3395	3.4238	4.14475	12.3669	0.2874	C	0.3809	0.8283
	1003	SpL_C_2017	FASTmrMLM	wsnp_Ex_c15378_23639387	6A	49195242	0.2449	3.2426	3.9529	6.2192	0.2809	CC	0.3978	0.8283
	1004	SpL_T_2017	mrMLM	wsnp_Ex_c15378_23639387	6A	49195242	0.3283	3.5991	4.32983	11.9072	0.2874	C	0.3071	0.7225
	1005	SpL_T_2017	FASTmrMLM	wsnp_Ex_c15378_23639387	6A	49195242	0.3313	3.9719	4.7221	13.5789	0.2809	CC	0.4102	0.7225
	1006	K_T_H	FASTmrEMMA	wsnp_BE490604A_Ta_2_1	6A	52397090	12.234	4.1438	4.9024	13.0507	0.3933	TT	227.384	273.641
	1007	K_T_H	pLARmEB	wsnp_BE490604A_Ta_2_1	6A	52397090	5.323	3.2832	3.996	9.8828	0.3933	TT	197.208	273.641
	1008	KUtE_C_2018	pLARmEB	Excalibur_c4483_1053	6A	62649462	0.0011	4.3232	5.0902	0.2139	0.4775	TC	0	0.0001
	1009	CHL_B_C_2017	pLARmEB	BS00065852_51	6A	63303052	0.7497	4.4246	5.1962	2.6363	0.1966	TT	3.2492	6.3638
	1010	HI_C_2017	FASTmrMLM	Excalibur_c6057_281	6A	63775433	0.0002	8.8508	9.7637	0.0005	0.4157	TT	0.0026	0.0046
	1011	HI_C_2017	FASTmrMLM	Ku_c1976_663	6A	65554732	0.0001	4.2712	5.0358	0.0004	0.3764	TT	0.0026	0.0046
	1012	SpL_T_2018	pLARmEB	Excalibur_c38928_307	6A	67642377	0.2189	4.5245	5.3006	2.1709	0.2809	TT	0.5799	1.4719
	1013	KUE_C_2018	pLARmEB	wsnp_Ex_c29025_38097560	6A	70428095	0.0005	12.2292	13.2095	0.6155	0.3034	CC	0	0
	1014	FW_T_H	pLARmEB	Jagger_c8372_125	6A	71181774	-0.0006	6.0264	6.8603	0.0385	0.2584	GG	0.0001	0.0003
	1015	HI_C_2017	FASTmrMLM	Excalibur_c30324_564	6A	73642303	0.0002	7.5427	8.4226	0.0005	0.3596	GG	0.0026	0.0046
	1016	KUE_C_2018	FASTmrMLM	BobWhite_c4255_127	6A	210950123	-0.0002	10.1468	11.0881	0.0259	0.0843	CC	0	0
	1017	FW_T_H	FASTmrMLM	Kukri_c16868_1062	6A	335780010	0.0009	7.4193	8.2958	0.0741	0.0787	CC	0.0001	0.0003
	1018	KUE_C_2018	FASTmrMLM	Excalibur_c15844_1470	6A	447833850	-0.0003	4.4662	5.2397	0.028	0.0337	CC	0	0
	1019	SpS_T_2017	FASTmrMLM	BS00059860_51	6A	454686148	-0.5902	3.2388	3.9489	3.1302	0.4944	AG	0.8788	2.3605
	1020	FW_T_H	FASTmrMLM	CAP8_c8024_128	6A	492282338	0.0004	8.7114	9.621	0.0465	0.2416	CC	0.0001	0.0003
	1021	PH_C_2017	FASTmrMLM	BS00037006_51	6A	520354777	-2.7772	3.9555	4.7048	11.7244	0.2472	AA	39.3157	50.492
	1022	KUtE_C_2018	pLARmEB	GENE-4052_338	6A	531516736	0.0002	4.6504	5.432	0.0416	0.2247	TT	0	0.0001
	1023	SpL_T_2017	pLARmEB	IAAV1652	6A	544204977	-0.2137	4.1673	4.927	5.2285	0.2809	AA	0.3041	0.7225
	1024	SpS_T_2017	pLARmEB	IAAV1652	6A	544204977	-0.3779	3.3858	4.1046	4.8873	0.2809	AA	1.0983	2.3605
	1025	FW_T_H	FASTmrMLM	IAAV1652	6A	544204977	6.0438e-05	5.7855	6.6111	0.0011	0.2809	AA	0.0001	0.0003
	1026	BY_C_2017	mrMLM	wsnp_Ex_c48789_53586502	6A	550073992	-1.276	6.4027	7.24897	23.9023	0.408	C	5.1044	6.5541
	1027	BY_C_2017	FASTmrMLM	wsnp_Ex_c48789_53586502	6A	550073992	-1.2444	5.2139	6.0185	22.7306	0.3989	CC	4.6515	6.5541
	1028	BY_C_2017	pLARmEB	wsnp_Ex_c48789_53586502	6A	550073992	-1.2444	5.2139	6.0185	23.2509	0.3989	CC	4.6515	6.5541
	1029	KUE_C_2017	pLARmEB	wsnp_Ex_c48789_53586502	6A	550073992	-0.0001	10.615	11.5657	0.0557	0.3989	CC	0	0
	1030	KUE_C_2017	pLARmEB	wsnp_Ex_c48789_53586406	6A	550074242	-0.0002	12.7164	13.7042	0.0948	0.3933	CC	0	0
	1031	LA_T_2016	FASTmrEMMA	Ra_c11721_631	6A	550955535	2.3528	4.1512	4.9102	10.1685	0.4167	GG	6.9921	11.7197
	1032	SpL_C_2017	pLARmEB	IAAV4068	6A	565468131	-0.6317	4.9212	5.7141	29.4894	0.1517	AA	0.5281	0.8283
	1033	KUtE_C_2018	pLARmEB	RAC875_c26820_847	6A	573123775	-0.0003	5.4291	6.2418	0.0211	0.0449	TT	0	0.0001
	1034	FW_T_H	pLARmEB	RAC875_c26820_847	6A	573123775	7.2981e-05	3.244	3.9544	0.0005	0.0449	TT	0.0001	0.0003
	1035	FW_T_H	FASTmrMLM	Excalibur_c8784_1005	6A	574486509	-0.0011	3.6253	4.3575	0.4518	0.4719	GG	0.0001	0.0003
	1036	BY_T_2018	FASTmrMLM	BobWhite_c17385_55	6A	581733533	-0.4303	3.0186	3.715	3.8736	0.2809	AA	1.7883	2.9564
	1037	KUtE_C_H	pLARmEB	Tdurum_contig54311_256	6A	582086953	0.1993	3.0068	3.7025	14.5312	0.4663	TC	0.0824	0.1004
	1038	PH_T_2017	mrMLM	wsnp_Ex_rep_c67436_66026057	6A	596581355	-2.2548	3.7325	4.47039	13.5381	0.3851	C	19.2139	34.5645
	1039	PH_T_2017	FASTmrMLM	wsnp_Ex_rep_c67436_66026057	6A	596581355	-1.7269	4.2623	5.0265	8.4963	0.3876	CC	18.8529	34.5645
	1040	PH_T_2017	FASTmrEMMA	wsnp_Ex_rep_c67436_66026057	6A	596581355	-4.4102	4.0454	4.7992	11.9348	0.3876	CC	23.4768	34.5645
	1041	KUtE_C_2017	pLARmEB	Excalibur_c55844_143	6A	600456991	0.0006	13.9909	15.0003	0.0678	0.0674	CC	0	0.0001
	1042	KUtE_C_2017	FASTmrMLM	GENE-3948_357	6A	607053707	0.0002	3.3943	4.1136	0.0111	0.191	CC	0	0.0001
	1043	KUtE_C_2017	pLARmEB	wsnp_JD_rep_c65886_41872083	6A	608632185	0.0018	6.8661	7.7267	1.5494	0.2472	TT	0	0.0001
	1044	KUtE_C_2018	pLARmEB	wsnp_JD_rep_c65886_41872083	6A	608632185	0.0002	4.3047	5.0708	0.0272	0.2472	TT	0	0.0001
	1045	SpS_T_2017	mrMLM	wsnp_Ku_c2956_5558754	6A	608968502	-0.9578	3.7535	4.4925	17.3146	0.477	T	0.9289	2.3605
	1046	KUE_C_2018	pLARmEB	Excalibur_c9754_1428	6A	609257585	0.0006	6.3099	7.1532	0.7548	0.3483	GG	0	0
	1047	KUtE_T_2017	pLARmEB	BS00011962_51	6A	615455262	0.0007	4.7931	5.5807	0.4523	0.1798	GG	0	0.0001
	1048	KUE_C_2018	FASTmrMLM	wsnp_Ra_c13998_21994095	6A	615458409	-0.0003	5.869	6.6975	0.0678	0.0955	AA	0	0
	1049	KUE_C_2018	pLARmEB	wsnp_Ra_c13998_21994095	6A	615458409	-0.0005	12.0528	13.0303	0.195	0.0955	AA	0	0
	1050	SpS_T_2017	pLARmEB	Excalibur_c5082_158	6A	615792025	0.6375	3.5221	4.2486	9.4254	0.1348	CC	1.0983	2.3605
	1051	BY_C_2016	pLARmEB	wsnp_CAP12_c4924_2241879	6B	163936	0.5703	3.8009	4.5424	13.7707	0.2534	NN	0.9318	2.0545
	1052	FW_T_H	FASTmrMLM	BS00082893_51	6B	166226	0.0024	8.1881	9.0849	0.6541	0.4663	AG	0.0001	0.0003
	1053	KUtE_T_2017	pLARmEB	BS00075789_51	6B	1969989	-0.0001	11.801	12.7739	0.0239	0.4494	GG	0	0.0001
	1054	SW_T_H	FASTmrMLM	Tdurum_contig61178_618	6B	3883903	-5.2559e-05	4.6756	5.4583	7.8526e-05	0.073	AA	0.0003	0.001
	1055	KUE_T_2018	FASTmrMLM	Ra_c22493_190	6B	6196744	-0.0003	3.6602	4.3942	0.0239	0.0337	GG	0	0.0001
	1056	KUE_T_2018	pLARmEB	Ra_c22493_190	6B	6196744	-0.0003	4.8494	5.6394	0.0302	0.0337	GG	0	0.0001
	1057	Na+_T_2017	FASTmrMLM	RAC875_rep_c77197_202	6B	8781473	-0.5694	3.0075	3.7032	4.5844	0.3483	CC	4.3144	6.58
	1058	Na+_T_2017	pLARmEB	RAC875_rep_c77197_202	6B	8781473	-0.5694	3.0075	3.7032	4.4976	0.3483	CC	4.3145	6.58
	1059	Chl_T_2018	pLARmEB	Tdurum_contig42655_1727	6B	12671291	3.3374	5.1877	5.9913	7.1155	0.1124	CC	20.5111	35.9326
	1060	KUtE_T_2018	FASTmrMLM	Ra_c8396_464	6B	20785583	0.0004	4.5122	5.2877	0.0904	0.3371	AG	0.0001	0.0001
	1061	SW_T_H	FASTmrMLM	BS00067829_51	6B	25258354	-0.0014	6.7987	7.6572	0.1809	0.3202	NN	0.0003	0.001
	1062	CHL_14DAG_C_H	FASTmrMLM	BobWhite_c42252_276	6B	31518193	0.8609	3.3068	4.021	7.9713	0.2135	CC	3.9901	6.7055
	1063	CHL_14DAG_C_H	FASTmrEMMA	BobWhite_c42252_276	6B	31518193	1.8545	3.6678	4.4022	8.0357	0.2135	CC	3.834	6.7055
	1064	KUtE_T_2018	pLARmEB	Tdurum_contig29033_75	6B	67937993	-8.8627e-05	6.2651	7.1069	0.0005	0.0169	CC	0	0.0001
	1065	KUE_C_2018	FASTmrMLM	CAP8_c1361_225	6B	91167467	0.0002	5.175	5.9781	0.0291	0.0393	CC	0	0
	1066	GY_T_2018	FASTmrMLM	Kukri_rep_c113626_110	6B	103785098	-0.0003	3.3446	4.061	4.9044e-06	0.0787	AA	0.4747	0.5078
	1067	KUtE_T_2018	pLARmEB	Kukri_rep_c113626_110	6B	103785098	-0.0009	11.5242	12.492	0.1888	0.0787	AA	0	0.0001
	1068	KUE_T_2018	pLARmEB	Kukri_rep_c113626_110	6B	103785098	-0.0019	9.416	10.3418	1.7058	0.0787	AA	0	0.0001
	1069	TN_T_2017	mrMLM	RAC875_c14852_2171	6B	156267554	-0.1035	4.2522	5.0159	7.527	0.2471	T	0.0302	0.0817
	1070	TN_T_2017	FASTmrMLM	RAC875_c14852_2171	6B	156267554	-0.0779	4.9477	5.7417	4.8511	0.2416	TT	0.037	0.0817
	1071	SW_T_H	FASTmrMLM	wsnp_Ra_c57648_59682822	6B	181102991	0.0009	5.8276	6.6547	0.0724	0.2472	GG	0.0003	0.001
	1072	KUtE_T_2018	FASTmrMLM	BS00022772_51	6B	240543564	0.0002	11.1665	12.1278	0.0036	0.0337	GG	0.0001	0.0001
	1073	KUE_T_2018	pLARmEB	BS00022772_51	6B	240543564	0.0004	15.1782	15.9546	0.047	0.0337	GG	0	0.0001
	1074	CHL_H_T_2017	pLARmEB	RAC875_c34604_142	6B	404121228	2.6571	3.7909	4.5319	8.2263	0.4888	AG	1.6805	3.2157
	1075	FW_T_H	pLARmEB	wsnp_Ex_c44510_50547245	6B	531523492	0.0003	4.9088	5.7012	0.0032	0.0449	AA	0.0001	0.0003
	1076	Na+_T_2017	mrMLM	Tdurum_contig51613_821	6B	581868783	-1.1436	4.3491	5.11729	12.3198	0.1609	C	4.6961	6.58
	1077	KUE_C_2017	FASTmrMLM	Tdurum_contig55473_381	6B	582825019	-0.0001	7.4791	8.3572	0.0078	0.073	CC	0	0
	1078	HI_C_2017	FASTmrMLM	Tdurum_contig50382_639	6B	604217180	7.695e-05	11.1785	12.14	0.0001	0.3652	CC	0.0026	0.0046
	1079	FW_C_H	FASTmrMLM	BS00012025_51	6B	625379773	-0.0001	4.5917	5.3707	0.0017	0.1685	GG	0.0001	0.0005
	1080	PH_C_2018	pLARmEB	Kukri_rep_c104521_727	6B	634332344	-2.5207	4.8352	5.6246	8.7043	0.1742	TT	21.0452	45.1192
	1081	RL_C_H	mrMLM	BS00023217_51	6B	644431546	10.7155	3.6605	4.39456	29.8577	0.4828	G	18.0166	33.8137
	1082	RL_C_H	FASTmrMLM	BS00023217_51	6B	644431546	8.314	3.6605	4.3946	22.2388	0.4831	NN	21.3196	33.8137
	1083	RL_C_H	pLARmEB	BS00023217_51	6B	644431546	10.0151	4.9826	5.778	13.0867	0.4831	NN	19.0034	33.8137
	1084	BY_C_2017	FASTmrEMMA	GENE-3904_72	6B	644480662	1.8117	4.2523	5.016	10.9033	0.3876	TT	4.7766	6.5541
	1085	KUE_T_2018	FASTmrMLM	Kukri_c9150_1181	6B	653883840	-0.0004	12.5462	13.5313	0.0178	0.0225	GG	0	0.0001
	1086	KUE_T_2018	pLARmEB	Kukri_c9150_1181	6B	653883840	-0.0003	4.3206	5.0875	0.0128	0.0225	GG	0	0.0001
	1087	LA_T_2016	mrMLM	Kukri_c49331_77	6B	664266146	-1.1894	3.2547	3.96576	10.5931	0.3143	G	4.8203	11.7197
	1088	LA_T_2016	FASTmrEMMA	Kukri_c49331_77	6B	664266146	-2.1565	3.4094	4.1296	7.8686	0.3056	GG	6.9921	11.7197
	1089	LA_T_2016	pLARmEB	Kukri_c49331_77	6B	664266146	-0.8716	4.2161	4.9781	1.8745	0.3056	GG	4.3795	11.7197
	1090	SpS_T_2018	mrMLM	wsnp_Ex_c1383_2652398	6B	681317437	-1.0908	3.5603	4.2889	10.1753	0.408	C	4.2877	8.5281
	1091	SpS_T_2018	FASTmrMLM	wsnp_Ex_c1383_2652398	6B	681317437	-0.982	3.8647	4.6095	9.8689	0.4213	CC	5.8134	8.5281
	1092	SpS_T_2018	pLARmEB	wsnp_Ex_c1383_2652398	6B	681317437	-0.9038	4.5518	5.3291	8.519	0.4213	CC	5.0197	8.5281
	1093	RWC_C_H	FASTmrEMMA	Ex_c17379_1425	6B	692782050	8.9241e-05	3.0925	3.7936	2.1577e-09	0.4045	GG	85.8564	86.8322
	1094	CHL_C_2016	pLARmEB	RAC875_c4030_1595	6B	706118794	7.618	6.8933	7.7547	8.7259	0.0274	CC	11.7635	29.6459
	1095	TKW_T_2017	mrMLM	RAC875_c4030_1595	6B	706118794	-5.0554	3.0112	3.70717	15.4487	0.023	C	12.3273	17.2984
	1096	KUtE_T_2017	pLARmEB	Tdurum_contig50364_1051	6B	711702185	0.0003	3.3274	4.0428	0.0755	0.1236	AA	0	0.0001
	1097	KUtE_C_2018	pLARmEB	Tdurum_contig10275_804	6B	712243510	-9.2563e-05	6.9406	7.8034	0.0006	0.0169	NN	0	0.0001
	1098	Chl_C_2018	FASTmrMLM	Tdurum_contig12648_732	6B	715705407	1.3531	3.1175	3.8202	11.6274	0.2809	NN	7.608	12.9157
	1099	Chl_C_2018	pLARmEB	Tdurum_contig12648_732	6B	715705407	1.395	3.1424	3.8466	13.5109	0.2809	NN	8.0584	12.9157
	1100	KUtE_C_2018	pLARmEB	Kukri_c19309_1803	6B	715953504	-0.0006	8.8879	9.8017	0.0367	0.5	TC	0	0.0001
	1101	KUE_C_2018	pLARmEB	Kukri_c19309_1803	6B	715953504	-0.0022	11.4149	12.3808	1.6107	0.5	TC	0	0
	1102	KUE_C_2018	FASTmrMLM	Excalibur_c4789_2748	6D	1413329	0.0002	9.4846	10.4119	0.0272	0.0337	CC	0	0
	1103	PH_C_2016	mrMLM	RAC875_c37955_116	6D	1508792	7.5991	3.3577	4.07484	25.9179	0.0563	A	49.8062	58.7275
	1104	KUtE_T_2017	pLARmEB	RAC875_c2102_3487	6D	2321510	0.002	8.8313	9.7438	1.989	0.4551	NN	0	0.0001
	1105	KUE_T_2017	pLARmEB	Kukri_c21405_2131	6D	2406212	0.0003	14.3253	15.3525	0.1233	0.1629	GG	0	0
	1106	RL_T_2018	pLARmEB	Ex_c3405_203	6D	3976821	6.4003	4.1596	4.9189	19.3608	0.3876	AC	112.98	152.233
	1107	SpL_T_2017	mrMLM	BobWhite_c7090_123	6D	5065255	0.3387	4.4524	5.22527	13.8716	0.3448	T	0.3071	0.7225
	1108	SpL_T_2017	FASTmrMLM	BobWhite_c7090_123	6D	5065255	0.3263	3.5123	4.2382	14.4242	0.3483	TT	0.4102	0.7225
	1109	SpL_T_2017	pLARmEB	BobWhite_c7090_123	6D	5065255	0.2737	5.1309	5.9322	10.1479	0.3483	TT	0.3041	0.7225
	1110	KUE_T_2018	pLARmEB	Excalibur_rep_c66622_1066	6D	5194838	0.0003	5.3379	6.1472	0.0908	0.3876	NN	0	0.0001
	1111	SpL_T_2018	pLARmEB	BS00009514_51	6D	6499193	-0.3338	4.5053	5.2805	3.3139	0.1854	TT	0.5799	1.4719
	1112	PH_C_2018	FASTmrMLM	Kukri_c3009_2542	6D	7106439	-3.2324	4.2344	4.9973	15.4565	0.1629	TT	30.9476	45.1192
	1113	RL_C_H	pLARmEB	wsnp_Ku_c20866_30535750	6D	13565243	-4.0494	3.995	4.7463	3.4829	0.0562	GG	19.0034	33.8137
	1114	SpS_C_2017	pLARmEB	Kukri_rep_c110681_178	6D	13598968	0.5875	3.7	4.4362	6.1846	0.1011	GG	1.3884	2.6043
	1115	KUtE_T_2018	FASTmrMLM	BS00021970_51	6D	24003436	-0.0001	14.4044	15.4775	0.0016	0.0337	GG	0.0001	0.0001
	1116	KUtE_T_2018	pLARmEB	RAC875_c26177_632	6D	26245017	0.0002	8.3769	9.2784	0.0285	0.3202	AA	0	0.0001
	1117	SpL_C_2017	mrMLM	Kukri_c22301_153	6D	61138328	-0.5274	3.035	3.7325	12.1428	0.069	T	0.3809	0.8283
	1118	SpL_C_2017	FASTmrMLM	Kukri_c22301_153	6D	61138328	-0.3777	3.4509	4.1734	6.0199	0.0787	TT	0.3978	0.8283
	1119	FW_C_H	FASTmrMLM	RAC875_rep_c104937_1620	6D	80521794	-0.0009	3.7168	4.4539	0.0574	0.0562	CC	0.0001	0.0005
	1120	KUE_C_2018	FASTmrMLM	BobWhite_c15526_58	6D	129522614	-0.0001	11.3522	12.3169	0.0024	0.0169	GG	0	0
	1121	FW_C_H	FASTmrMLM	IAAV7251	6D	309588003	0.0022	6.1501	6.9882	0.3317	0.073	CC	0.0001	0.0005
	1122	Na+_C_2018	pLARmEB	IAAV7251	6D	309588003	12.5449	5.259	6.0653	8.0196	0.073	CC	269.54	509.913
	1123	KUE_C_2018	FASTmrMLM	RAC875_rep_c111047_466	6D	380488735	-0.0002	6.8855	7.7466	0.008	0.0169	TT	0	0
	1124	FW_T_H	FASTmrMLM	Excalibur_rep_c105550_175	6D	397353234	0.0012	12.6954	13.6827	0.0641	0.0281	CC	0.0001	0.0003
	1125	TN_C_2017	pLARmEB	Jagger_c7132_108	6D	461923722	0.3997	5.729	6.5526	4.7554	0.4888	CC	0.1613	0.2951
	1126	BY_C_2017	FASTmrMLM	Jagger_c7132_108	6D	461923722	2.4601	3.0955	3.7968	7.9274	0.4888	CC	4.6515	6.5541
	1127	BY_C_2017	pLARmEB	Jagger_c7132_108	6D	461923722	2.4601	3.0955	3.7968	8.109	0.4888	CC	4.6515	6.5541
	1128	KUE_C_2018	pLARmEB	GENE-3993_284	6D	462464731	0.0006	5.3635	6.1738	0.6359	0.3315	AA	0	0
	1129	K_C_2017	FASTmrMLM	Ex_c67100_1172	6D	462630818	2.5714e-05	3.1874	3.8944	8.6459e-11	0.2921	AA	466.367	572.308
	1130	K_C_2017	FASTmrEMMA	Ex_c67100_1172	6D	462630818	15.3449	3.4045	4.1243	8.277	0.2921	AA	457.56	572.308
	1131	KUpE_C_2017	FASTmrEMMA	Ex_c67100_1172	6D	462630818	0.0818	3.4045	4.1243	7.6194	0.2921	AA	0.0142	0.0177
	1132	Fe_C_2017	mrMLM	wsnp_Ku_c4603_8305972	6D	463713332	3.5866	4.2492	5.01276	6.1562	0.2069	C	70.2976	83.1566
	1133	FLA_C_2018	FASTmrMLM	BS00022787_51	6D	467188004	1.6672	3.3749	4.093	12.7482	0.1236	NN	10.2321	12.2219
	1134	KUpE_C_2018	pLARmEB	Kukri_c41086_105	6D	468910518	-0.0004	3.0516	3.7502	0.0002	0.0787	GG	0.0252	0.0327
	1135	KUE_T_2018	FASTmrMLM	Kukri_c41086_105	6D	468910518	-0.0006	5.6862	6.5083	0.2588	0.0787	GG	0	0.0001
	1136	KUtE_T_2018	FASTmrMLM	D_contig19916_460	6D	469248442	-0.0002	4.7478	5.5335	0.0028	0.0281	TT	0.0001	0.0001
	1137	KUtE_T_2018	pLARmEB	RAC875_c86296_278	6D	469576164	-0.0003	3.785	4.5256	0.0463	0.4494	GG	0	0.0001
	1138	SpS_C_2017	FASTmrMLM	BS00075804_51	6D	469803151	0.5846	3.4735	4.1973	13.1068	0.3371	NN	1.6976	2.6043
	1139	SpS_C_2017	pLARmEB	BS00075804_51	6D	469803151	0.4107	3.6122	4.3436	6.4691	0.3371	NN	1.3884	2.6043
	1140	HI_T_2017	mrMLM	Ra_c8058_1047	6D	469831336	-0.2036	5.5609	6.3785	36.5782	0.023	T	0.0123	0.0155
	1141	FW_C_H	FASTmrMLM	CAP7_c2559_543	6D	471017889	0.0028	10.2132	11.1559	1.6321	0.2753	GG	0.0001	0.0005
	1142	K_C_2017	pLARmEB	IAAV2636	6D	471070434	-10.6304	3.5524	4.2806	6.6312	0.1404	AA	388.547	572.308
	1143	KUpE_C_2017	pLARmEB	IAAV2636	6D	471070434	-0.0585	3.9558	4.7052	6.0434	0.1404	AA	0.0103	0.0177
	1144	KUtE_C_2017	pLARmEB	Kukri_c44291_138	6D	471070735	0.0009	7.644	8.5266	0.3077	0.1573	AA	0	0.0001
	1145	SpL_C_2018	pLARmEB	RFL_Contig2615_982	6D	472890145	0.4844	7.9677	8.8589	5.5745	0.1348	CC	0.3848	1.2931
	1146	TKW_C_2017	pLARmEB	GENE-3593_37	7A	1699666	5.0089	3.4946	4.2196	5.1658	0.0169	AA	11.4398	17.2414
	1147	DM_C_2018	mrMLM	GENE-3593_37	7A	1699666	-7.4764	6.3598	7.2047	34.9355	0.0172	A	8.1918	12.7866
	1148	DM_C_2018	FASTmrMLM	GENE-3593_37	7A	1699666	-6.6441	6.3607	7.2056	27.2718	0.0169	AA	7.6177	12.7866
	1149	DM_C_2018	pLARmEB	GENE-3593_37	7A	1699666	-6.6437	6.3607	7.2056	8.9513	0.0169	AA	7.6171	12.7866
	1150	KUE_C_2018	pLARmEB	GENE-3593_37	7A	1699666	0.0001	4.0255	4.7783	0.003	0.0169	AA	0	0
	1151	FW_T_H	pLARmEB	GENE-3593_37	7A	1699666	2.8541e-05	10.0781	11.018	2.1006e-05	0.0169	AA	0.0001	0.0003
	1152	CHL_T_2016	FASTmrMLM	Excalibur_c662_1047	7A	2717639	2.7678	3.7605	4.4999	9.1163	0.1164	AA	16.3436	26.2812
	1153	CHL_T_2016	pLARmEB	Excalibur_c662_1047	7A	2717639	2.7679	3.7605	4.4999	8.7691	0.1164	AA	16.3434	26.2812
	1154	RW_T_H	pLARmEB	Ex_c23000_602	7A	3010664	-0.6917	4.175	4.9351	6.0638	0.4831	NN	0.4896	1.1757
	1155	FW_C_H	FASTmrMLM	BobWhite_c20558_374	7A	6537017	0.0014	7.0168	7.8818	0.3305	0.2135	GG	0.0001	0.0005
	1156	SpL_C_2018	pLARmEB	Tdurum_contig13245_443	7A	10908619	-0.4957	6.4953	7.3445	6.5584	0.1236	GG	0.3848	1.2931
	1157	KUtE_T_2017	pLARmEB	RAC875_c48202_231	7A	12177316	0.0008	11.6277	12.5974	0.7545	0.4663	GG	0	0.0001
	1158	GpS_C_2017	pLARmEB	IAAV2596	7A	12177854	-1.5282	3.0623	3.7615	5.1944	0.4775	CC	28.7359	44.9544
	1159	SW_T_H	FASTmrMLM	Excalibur_c9183_1397	7A	12411398	0.0005	9.38	10.305	0.0084	0.073	TT	0.0003	0.001
	1160	KUE_C_2018	FASTmrMLM	BS00021122_51	7A	14734883	-0.0003	11.1389	12.0997	0.061	0.073	GG	0	0
	1161	Na+_C_2018	FASTmrMLM	Tdurum_contig77759_52	7A	30030028	-11.5512	3.4505	4.173	13.8247	0.1236	GG	441.013	509.913
	1162	KUtE_C_2017	pLARmEB	BS00078400_51	7A	31875862	0.0047	8.5815	9.488	4.3581	0.4719	TT	0	0.0001
	1163	SpL_C_2018	FASTmrMLM	RAC875_c7734_411	7A	31879724	-0.5586	4.431	5.2029	11.2609	0.1124	CC	0.7264	1.2931
	1164	KUtE_C_2018	pLARmEB	Kukri_c107638_253	7A	32028594	-0.0003	9.0876	10.006	0.0159	0.0506	CC	0	0.0001
	1165	FW_C_H	FASTmrMLM	Excalibur_rep_c68955_286	7A	40191933	-0.0005	3.1305	3.834	0.0205	0.0955	GG	0.0001	0.0005
	1166	CHL_H_C_2017	mrMLM	Excalibur_c14189_134	7A	47444419	-1.3695	4.9499	5.744	18.2273	0.2126	A	4.772	6.7807
	1167	CHL_H_C_2017	FASTmrMLM	Excalibur_c14189_134	7A	47444419	-1.0108	3.7271	4.4647	10.4954	0.2079	AA	4.933	6.7807
	1168	CHL_H_C_2017	FASTmrEMMA	Excalibur_c14189_134	7A	47444419	-2.1639	3.6892	4.4248	10.7884	0.2079	AA	5.7813	6.7807
	1169	CHL_H_C_2017	pLARmEB	Excalibur_c14189_134	7A	47444419	-1.0941	5.8337	6.661	12.0965	0.2079	AA	5.7708	6.7807
	1170	GpS_C_2017	pLARmEB	RAC875_c26866_239	7A	51381330	-2.0952	3.0777	3.7779	4.2309	0.118	CC	28.7359	44.9544
	1171	GY_C_2016	pLARmEB	Excalibur_rep_c68004_182	7A	52967152	-0.4751	4.4895	5.264	12.3127	0.1575	TT	0.4718	1.1659
	1172	TN_C_2018	pLARmEB	Kukri_rep_c70864_638	7A	57873827	0.2346	3.724	4.4614	4.007	0.2022	GG	0.2965	0.6647
	1173	KUtE_T_2017	pLARmEB	BobWhite_c8076_300	7A	68889457	-0.0003	5.9062	6.736	0.0367	0.073	TT	0	0.0001
	1174	KUE_T_2017	pLARmEB	BobWhite_c8076_300	7A	68889457	-0.0002	13.5473	14.5566	0.0224	0.073	TT	0	0
	1175	KUtE_T_2017	pLARmEB	GENE-4375_382	7A	79780963	-0.0005	7.635	8.5174	0.2431	0.2753	GG	0	0.0001
	1176	FW_T_H	FASTmrMLM	wsnp_Ex_c13337_21022658	7A	81133978	-0.002	6.5049	7.3544	0.9405	0.1854	CC	0.0001	0.0003
	1177	KUtE_C_2018	FASTmrMLM	IACX9283	7A	85414746	0.0018	4.2017	4.963	2.0784	0.309	CC	0.0001	0.0001
	1178	KUtE_C_2018	pLARmEB	IACX9283	7A	85414746	0.0023	11.8132	12.7864	3.8057	0.309	CC	0	0.0001
	1179	SW_T_H	FASTmrMLM	JD_c19177_1462	7A	87307571	0.0007	6.0138	6.8473	0.0193	0.118	AA	0.0003	0.001
	1180	SpL_T_2018	pLARmEB	RAC875_c7988_1588	7A	97575180	-0.6685	4.8448	5.6346	14.0506	0.0899	CC	0.5799	1.4719
	1181	CHL_C_2016	pLARmEB	BS00065077_51	7A	162521335	-1.9274	3.2343	3.9441	3.5111	0.3836	CC	11.7635	29.6459
	1182	HI_C_2017	FASTmrMLM	BS00046998_51	7A	232025768	0.0001	4.1691	4.9289	0.0003	0.236	CC	0.0026	0.0046
	1183	SpL_C_2018	FASTmrEMMA	wsnp_Ex_c200_391493	7A	244470545	-0.7897	3.9738	4.7241	10.1002	0.3764	GG	0.8729	1.2931
	1184	HI_C_2017	mrMLM	CAP11_c4929_307	7A	266977141	0.03	3.7293	4.46702	18.7722	0.3851	T	0.0037	0.0046
	1185	SpL_T_2017	mrMLM	wsnp_Ex_c7216_12390889	7A	520904177	0.4116	4.747	5.5327	19.9804	0.3448	T	0.3071	0.7225
	1186	SpL_T_2017	FASTmrMLM	wsnp_Ex_c7216_12390889	7A	520904177	0.251	3.8871	4.633	8.3225	0.3371	TT	0.4102	0.7225
	1187	KUE_T_2018	pLARmEB	BS00022959_51	7A	544261638	0.0001	3.1052	3.8071	0.0041	0.0225	AA	0	0.0001
	1188	SpL_T_2017	pLARmEB	wsnp_Ex_c1924_3630519	7A	582637131	0.2277	3.2158	3.9245	5.5032	0.2416	GG	0.3041	0.7225
	1189	SpL_C_2018	pLARmEB	wsnp_Ra_rep_c105182_89171305	7A	585066140	-0.4937	3.8015	4.543	3.364	0.073	CC	0.3848	1.2931
	1190	SpS_C_2018	FASTmrMLM	wsnp_Ra_rep_c105182_89171305	7A	585066140	-1.4652	4.1866	4.9472	6.6907	0.073	CC	3.9069	6.6588
	1191	HI_T_2017	FASTmrMLM	Ex_c7397_535	7A	596039303	0.0001	3.0479	3.7462	8.8589e-05	0.3202	GG	0.0108	0.0155
	1192	CHL_C_2016	FASTmrEMMA	Kukri_c42807_473	7A	607556072	-4.1855	3.4129	4.1332	11.3772	0.2603	TT	24.8691	29.6459
	1193	GY_C_2016	mrMLM	RAC875_c16287_726	7A	610208889	-0.5056	4.9302	5.7235	10.1959	0.4789	G	0.6098	1.1659
	1194	GY_C_2016	FASTmrMLM	RAC875_c16287_726	7A	610208889	-0.3921	4.3443	5.1123	9.6261	0.4863	AG	0.6486	1.1659
	1195	GY_C_2016	pLARmEB	RAC875_c16287_726	7A	610208889	-0.4161	6.3247	7.1685	12.1787	0.4863	AG	0.4718	1.1659
	1196	LA_T_2017	pLARmEB	Kukri_c2990_129	7A	621320384	2.7364	4.0311	4.7842	26.7952	0.4494	AG	7.2959	11.4967
	1197	HI_T_2016	mrMLM	Kukri_c53682_85	7A	644619198	-5.182	3.789	4.52985	13.6572	0.3099	A	67.8796	142.625
	1198	HI_T_2016	FASTmrMLM	Kukri_c53682_85	7A	644619198	-3.9808	4.4523	5.2252	8.8538	0.3151	AA	85.0659	142.625
	1199	HI_T_2016	pLARmEB	Kukri_c53682_85	7A	644619198	-4.2882	7.9731	8.8644	11.1291	0.3151	AA	50.1635	142.625
	1200	GY_T_2016	mrMLM	BobWhite_c53517_181	7A	647306000	-0.5419	4.767	5.55354	17.4588	0.2254	C	0.6803	0.9271
	1201	KUE_T_2018	FASTmrMLM	BS00066295_51	7A	657375487	-0.0001	6.0333	6.8675	0.0023	0.0169	AA	0	0.0001
	1202	KUE_C_2017	FASTmrMLM	BS00009838_51	7A	666607524	-0.0002	14.0126	15.0003	0.0157	0.0281	TT	0	0
	1203	KUE_C_2017	pLARmEB	BS00009838_51	7A	666607524	-0.0001	6.5296	7.3799	0.0063	0.0281	TT	0	0
	1204	Na+_T_2018	FASTmrMLM	BS00094965_51	7A	669729041	-7.8594	3.3001	4.0139	6.6606	0.1292	CC	288.182	424.758
	1205	KUE_C_2018	pLARmEB	JD_c149_3175	7A	670767433	-0.0006	3.1424	3.8466	0.8742	0.3708	TT	0	0
	1206	KUtE_C_2017	pLARmEB	wsnp_JD_c149_238783	7A	670769304	-0.0006	10.872	11.8277	0.0596	0.1742	TG	0	0.0001
	1207	KUE_T_2017	pLARmEB	wsnp_Ex_c11047_17915225	7A	670769585	-0.0004	7.9989	8.8909	0.1743	0.4382	TC	0	0
	1208	KUE_C_2017	FASTmrMLM	RAC875_c1115_341	7A	670780611	-0.0002	5.3602	6.1704	0.0275	0.2528	AG	0	0
	1209	SpS_T_2017	mrMLM	wsnp_Ku_rep_c104159_90704469	7A	674279479	1.1598	8.7354	9.64559	37.2923	0.3276	T	0.9289	2.3605
	1210	SpS_T_2017	FASTmrMLM	wsnp_Ku_rep_c104159_90704469	7A	674279479	0.4896	4.9268	5.72	9.2221	0.3202	TT	0.8788	2.3605
	1211	SpS_T_2017	pLARmEB	wsnp_Ku_rep_c104159_90704469	7A	674279479	0.4467	3.9574	4.7068	7.4951	0.3202	TT	1.0983	2.3605
	1212	KUE_T_2018	pLARmEB	Excalibur_c14451_1137	7A	675268377	-0.0006	11.3421	12.3066	0.1204	0.0393	GG	0	0.0001
	1213	KUtE_T_2018	pLARmEB	BS00022169_51	7A	691259651	-0.0002	11.0915	12.0514	0.0086	0.0618	GG	0	0.0001
	1214	K_C_2018	pLARmEB	wsnp_Ra_c35321_43882919	7A	692880472	-10.0473	3.5337	4.2608	8.5079	0.3146	GG	875.98	1060.55
	1215	KUpE_C_2018	pLARmEB	wsnp_Ra_c35321_43882919	7A	692880472	-0.0604	5.696	6.5185	9.9784	0.3146	GG	0.0252	0.0327
	1216	KUE_T_2018	pLARmEB	wsnp_Ra_c35321_43882919	7A	692880472	-0.0005	6.2341	7.0749	0.3467	0.3146	GG	0	0.0001
	1217	KUtE_C_2017	pLARmEB	BS00061940_51	7A	700274575	0.0023	6.1051	6.9417	3.5216	0.2191	CC	0	0.0001
	1218	KUtE_C_2017	FASTmrMLM	RAC875_rep_c110061_183	7A	700301431	0.0002	3.4684	4.1919	0.0028	0.0169	TT	0	0.0001
	1219	KUtE_T_2017	FASTmrMLM	RAC875_rep_c110061_183	7A	700301431	4.2251e-05	7.5704	8.451	0.0003	0.0169	TT	0	0.0001
	1220	TN_T_2018	FASTmrEMMA	Excalibur_c15750_931	7A	700339541	-3.7716e-05	3.0056	3.7012	1.167e-08	0.0562	GG	0.5985	0.6463
	1221	KUE_C_2018	FASTmrMLM	Ex_c29172_877	7A	708363089	0.0009	8.1186	9.0136	1.8217	0.427	CC	0	0
	1222	KUE_T_2018	pLARmEB	Excalibur_rep_c73544_223	7A	709406943	-0.0002	10.5363	11.4855	0.0119	0.073	GG	0	0.0001
	1223	KUtE_T_2017	pLARmEB	Kukri_rep_c70199_638	7A	709407115	0.0001	14.2539	15.2556	0.005	0.0393	CC	0	0.0001
	1224	KUE_C_2017	FASTmrMLM	RAC875_c1606_644	7A	709885312	0.0004	10.5064	11.455	0.4589	0.3034	GG	0	0
	1225	FW_T_H	FASTmrMLM	Jagger_c10704_106	7A	709885363	0.0014	3.1184	3.8211	0.6334	0.2809	NN	0.0001	0.0003
	1226	SpS_T_2017	FASTmrMLM	Ku_c19745_892	7A	712058659	-0.4833	6.3865	7.2323	7.795	0.236	TT	0.8788	2.3605
	1227	CHL_T_C_2017	mrMLM	wsnp_Ex_c1159_2225557	7A	713855219	-1.8474	3.5719	4.30114	36.3658	0.1552	A	4.1891	5.6834
	1228	CHL_T_C_2017	FASTmrMLM	wsnp_Ex_c1159_2225557	7A	713855219	-1.3159	3.3112	4.0256	22.2475	0.1573	NN	5.0058	5.6834
	1229	SpS_C_2018	pLARmEB	BS00084192_51	7A	716247510	0.8262	3.124	3.8271	3.1512	0.3427	TC	3.7576	6.6588
	1230	RL_C_2018	FASTmrEMMA	wsnp_Ex_c916_1767286	7A	716247571	-5.8827	3.1705	3.8765	8.3841	0.3539	CC	66.5443	86.267
	1231	RL_C_2018	FASTmrMLM	wsnp_Ex_c5839_10246812	7A	717036867	3.976	6.6534	7.5075	7.0855	0.1629	CC	29.9338	86.267
	1232	RL_C_2018	mrMLM	wsnp_Ra_c7112_12318340	7A	717040885	6.2411	9.1056	10.0244	19.8488	0.1782	C	36.3012	86.267
	1233	RL_C_2018	pLARmEB	wsnp_Ra_c7112_12318340	7A	717040885	2.7894	4.7148	5.4991	2.9281	0.1854	CC	22.6434	86.267
	1234	KUE_C_2018	FASTmrMLM	Kukri_c17839_484	7A	717138476	0.0004	7.039	7.9047	0.4148	0.1966	NN	0	0
	1235	KUE_C_2018	pLARmEB	Kukri_c17839_484	7A	717138476	0.0003	11.3224	12.2866	0.2595	0.1966	NN	0	0
	1236	KUE_C_2017	FASTmrMLM	BS00022137_51	7A	729397548	0.0003	9.9935	10.9316	0.0616	0.0506	AA	0	0
	1237	PH_T_2017	pLARmEB	Kukri_c18055_1740	7A	736518499	2.3927	4.528	5.3042	3.1919	0.1067	TT	14.2695	34.5645
	1238	RWC_C_H	mrMLM	Tdurum_contig5352_556	7B	5062009	-17.6689	3.4061	4.12603	35.8441	0.4885	A	72.8011	86.8322
	1239	RWC_C_H	FASTmrMLM	Tdurum_contig5352_556	7B	5062009	-13.8574	3.4061	4.126	25.0199	0.4888	NN	74.9759	86.8322
	1240	KUE_T_2017	pLARmEB	Kukri_c60729_430	7B	12953101	8.1533e-05	8.9084	9.8227	0.0036	0.0449	CC	0	0
	1241	KUpE_C_2018	pLARmEB	GENE-5000_606	7B	41522961	-1.3474e-05	4.0214	4.774	1.8149e-07	0.073	TT	0.0252	0.0327
	1242	FW_T_H	pLARmEB	wsnp_Ku_rep_c102842_89723861	7B	43880843	0.0001	5.8439	6.6716	0.0047	0.3708	TT	0.0001	0.0003
	1243	KUtE_T_2017	pLARmEB	BS00031746_51	7B	43882125	-0.0005	14.0769	15.1095	0.349	0.4101	GG	0	0.0001
	1244	LA_C_H	FASTmrMLM	BS00031746_51	7B	43882125	4.3355e-05	3.7185	4.4557	2.1719e-07	0.4101	GG	0.8313	0.8409
	1245	KUE_T_2017	pLARmEB	BS00064344_51	7B	44878553	-0.0007	6.7673	7.6249	1.1887	0.3315	GG	0	0
	1246	SW_C_H	pLARmEB	GENE-4862_901	7B	59647565	-0.0155	5.8436	6.6713	2.9651	0.0787	GG	0.0004	0.0007
	1247	HI_C_2016	mrMLM	BS00079019_51	7B	84184022	6.9186	3.1093	3.81148	13.3553	0.1408	T	98.8546	136.896
	1248	KUE_T_2017	pLARmEB	RAC875_c53629_760	7B	107100604	-0.0003	10.1089	11.0494	0.0494	0.0674	CC	0	0
	1249	KUE_C_2017	pLARmEB	BobWhite_c10017_644	7B	136312143	-0.0001	6.8722	7.7329	0.0269	0.1629	GG	0	0
	1250	KUtE_C_2018	pLARmEB	Tdurum_contig28644_90	7B	136314959	0.0003	3.0774	3.7776	0.0203	0.0843	TT	0	0.0001
	1251	TN_C_2017	FASTmrMLM	RAC875_rep_c73990_174	7B	144662256	-0.1413	3.8531	4.5973	6.3158	0.3315	GG	0.1409	0.2951
	1252	TN_C_2017	pLARmEB	RAC875_rep_c73990_174	7B	144662256	-1.0404e-05	3.2915	4.0048	3.4228e-08	0.3315	GG	0.1613	0.2951
	1253	TN_T_2017	mrMLM	Ku_c9598_2119	7B	159141848	-0.1082	5.1318	5.93317	11.0359	0.4483	A	0.0302	0.0817
	1254	TN_T_2017	FASTmrMLM	Ku_c9598_2119	7B	159141848	-0.0898	5.1714	5.9743	8.6521	0.4382	AA	0.037	0.0817
	1255	TN_T_2018	FASTmrMLM	Excalibur_c43037_831	7B	270534135	-0.0005	3.0848	3.7854	9.0256e-06	0.0393	AA	0.4398	0.6463
	1256	KUE_C_2017	FASTmrMLM	Ra_c19501_1510	7B	505294696	0.0003	7.7127	8.5972	0.0656	0.0674	TT	0	0
	1257	PH_T_2016	FASTmrEMMA	Kukri_c18296_567	7B	572416612	-9.7	3.0115	3.7075	16.4142	0.3082	TT	85.7261	108.48
	1258	GpS_C_2016	mrMLM	Kukri_c14804_757	7B	584812776	3.2488	4.9199	5.71278	14.166	0.3451	C	25.0396	48.0483
	1259	GpS_C_2016	FASTmrMLM	Kukri_c14804_757	7B	584812776	2.6962	4.9199	5.7128	11.3141	0.3356	CC	28.8457	48.0483
	1260	KUE_C_2018	FASTmrMLM	BS00010555_51	7B	585480380	-0.0003	4.6133	5.3933	0.0858	0.073	NN	0	0
	1261	KUE_T_2018	FASTmrMLM	tplb0052m17_604	7B	597311300	-0.0013	3.7174	4.4545	1.7937	0.1742	CC	0	0.0001
	1262	CHL_B_T_2017	FASTmrEMMA	RAC875_c7251_656	7B	604035480	-1.1978	3.3814	4.1	7.5541	0.2978	GG	2.8093	3.4913
	1263	RL_C_2017	mrMLM	RAC875_c7123_1703	7B	606351814	2.6179	3.0979	3.79937	11.5713	0.3521	T	28.182	52.7719
	1264	RL_C_2017	FASTmrMLM	RAC875_c7123_1703	7B	606351814	1.8705	3.0979	3.7994	5.9719	0.3562	TT	32.5679	52.7719
	1265	Chl_T_2018	pLARmEB	BS00075332_51	7B	611615687	-1.6297	3.5568	4.2852	3.304	0.3315	TT	20.5111	35.9326
	1266	KUtE_C_2018	pLARmEB	Kukri_c100592_82	7B	648106945	0.0005	4.6927	5.4761	0.2379	0.4944	GG	0	0.0001
	1267	GY_T_2018	FASTmrMLM	BS00076675_51	7B	653289313	-1.2681e-05	3.1794	3.8859	3.1665e-08	0.4944	TT	0.4747	0.5078
	1268	KUE_T_2018	FASTmrMLM	BS00076675_51	7B	653289313	-0.0006	11.2122	12.1743	0.6228	0.4944	TT	0	0.0001
	1269	KUtE_T_2018	pLARmEB	Excalibur_c91560_445	7B	658220471	-8.8627e-05	6.2651	7.1069	0.0005	0.0169	GG	0	0.0001
	1270	KUpE_C_2017	pLARmEB	wsnp_Ex_c19_39269	7B	693338029	-5.5373e-05	3.9941	4.7454	8.1975e-06	0.3202	GG	0.0103	0.0177
	1271	KUtE_T_2017	pLARmEB	Kukri_c55731_81	7B	700403758	0.0005	6.391	7.2369	0.1787	0.1517	GG	0	0.0001
	1272	HI_C_2017	FASTmrMLM	IAAV4699	7B	701219400	-0.0152	5.6933	6.5157	3.752	0.1404	NN	0.0026	0.0046
	1273	KUE_C_2017	FASTmrMLM	BS00063641_51	7B	702528984	0.0003	5.9458	6.777	0.0935	0.1011	GG	0	0
	1274	SpL_C_2017	FASTmrMLM	wsnp_Ex_c323_629581	7B	703705316	0.3957	4.1565	4.9157	17.8964	0.2921	AA	0.3978	0.8283
	1275	RW_T_H	mrMLM	CAP11_c31_213	7B	709468877	0.9029	4.2588	5.02281	19.6259	0.0747	G	0.5649	1.1757
	1276	NA_T_H	pLARmEB	CAP11_c31_213	7B	709468877	-125084	3.8324	4.5755	15.5724	0.0787	GG	2.33418e+10	3.19381e+10
	1277	TN_C_2016	FASTmrEMMA	GENE-4710_573	7B	712083266	-0.9778	3.1445	3.8489	12.2625	0.1575	TT	0.581	0.8478
	1278	TKW_T_2016	FASTmrEMMA	RAC875_c16049_89	7B	717794491	8.2109	3.5373	4.2647	11.4643	0.4247	TT	22.5789	30.899
	1279	KUtE_C_2017	pLARmEB	Tdurum_contig42586_720	7B	718850865	0.0032	7.8658	8.7543	1.1818	0.4888	TC	0	0.0001
	1280	SW_T_H	FASTmrMLM	BS00101258_51	7B	727530012	0.0006	4.3522	5.1205	0.0042	0.0225	GG	0.0003	0.001
	1281	KUE_C_2018	FASTmrMLM	RAC875_c31851_529	7B	732399766	0.0002	5.0068	5.8032	0.0212	0.0618	CC	0	0
	1282	Zn_T_2017	pLARmEB	CAP12_c194_402	7B	742463569	1.834	3.4982	4.2234	8.986	0.2697	AA	19.9421	30.0386
	1283	RL_T_2018	mrMLM	tplb0040b02_681	7B	743300654	4.1958	3.5182	4.24447	9.4749	0.3046	A	96.2289	152.233
	1284	CHL_14DAG_T_H	FASTmrEMMA	Tdurum_contig30909_76	7B	743304216	1.6917	3.0366	3.7342	7.7085	0.4888	AA	5.8238	7.9209
	1285	KUtE_C_2017	pLARmEB	Ku_c35807_609	7B	745230917	0.0013	9.7904	10.7243	1.0743	0.3371	CC	0	0.0001
	1286	PH_C_2018	pLARmEB	BS00060980_51	7B	749560038	-1.6108	3.9322	4.6804	5.6916	0.4719	AA	21.0452	45.1192
	1287	FW_T_H	pLARmEB	BS00097529_51	7B	750604062	-0.0002	5.1333	5.9347	0.0007	0.0169	GG	0.0001	0.0003
	1288	SpL_C_2017	mrMLM	BS00070821_51	7D	4008392	-0.297	3.4765	4.20043	9.6133	0.3506	C	0.3809	0.8283
	1289	SpL_C_2017	FASTmrMLM	BS00070821_51	7D	4008392	-0.244	4.3759	5.1453	6.271	0.3427	CC	0.3978	0.8283
	1290	KUE_C_2018	FASTmrMLM	Kukri_c37227_579	7D	5049477	-0.0004	13.0452	14.0408	0.0807	0.0281	AA	0	0
	1291	KUE_T_2018	FASTmrMLM	Kukri_c37227_579	7D	5049477	-0.0005	7.8258	8.7133	0.0671	0.0281	AA	0	0.0001
	1292	KUtE_T_2017	pLARmEB	BS00008445_51	7D	5180083	-0.0003	4.8774	5.6685	0.0887	0.236	TT	0	0.0001
	1293	KUtE_T_2018	pLARmEB	BS00008445_51	7D	5180083	-0.0005	12.9391	13.9293	0.1089	0.236	TT	0	0.0001
	1294	SpL_T_2018	pLARmEB	Ra_c30952_531	7D	5182278	-0.3633	4.1129	4.87	3.2068	0.191	CC	0.5799	1.4719
	1295	SpS_C_2017	pLARmEB	Excalibur_c16580_388	7D	18438307	-0.5145	4.6538	5.4355	9.3627	0.2809	GG	1.3884	2.6043
	1296	KUtE_C_2017	pLARmEB	Kukri_c25115_740	7D	20585294	-0.0032	4.9992	5.7953	5.5393	0.382	NN	0	0.0001
	1297	KUtE_C_2017	pLARmEB	IAAV6615	7D	22612166	5.8654e-05	4.4891	5.2636	0.0004	0.0225	AA	0	0.0001
	1298	KUtE_T_2017	FASTmrMLM	IAAV6615	7D	22612166	0.0002	3.0982	3.7997	0.0108	0.0225	AA	0	0.0001
	1299	KUE_T_2017	pLARmEB	IAAV6615	7D	22612166	5.4211e-05	15.0632	15.9546	0.0013	0.0225	AA	0	0
	1300	BY_C_2018	FASTmrMLM	D_GCE8AKX02ILA1U_88	7D	55073874	-0.5274	3.3162	4.0309	7.5135	0.382	TT	2.7289	3.4546
	1301	BY_C_2018	pLARmEB	D_GCE8AKX02ILA1U_88	7D	55073874	-0.528	4.2447	5.0081	6.8493	0.382	TT	2.7281	3.4546
	1302	KUtE_C_2018	FASTmrMLM	GENE-4346_109	7D	71318625	-1.4556e-05	3.3327	4.0484	2.6452e-05	0.0449	AA	0.0001	0.0001
	1303	KUE_C_2018	FASTmrMLM	GENE-4346_109	7D	71318625	-0.0004	8.6639	9.5724	0.0786	0.0449	AA	0	0
	1304	NA_C_H	mrMLM	CAP7_c1383_548	7D	78882204	-2.2872	4.1161	4.87334	6.2641	0.0977	T	6.8329	16.5406
	1305	Na+_C_H	mrMLM	CAP7_c1383_548	7D	78882204	-2.2872	4.1161	4.87334	6.2641	0.0977	T	6.8329	16.5406
	1306	Na+_C_2018	mrMLM	CAP7_c1383_548	7D	78882204	-16.704	4.2369	4.99989	13.3969	0.0977	T	247.897	509.913
	1307	CHL_H_T_2017	pLARmEB	RFL_Contig1820_712	7D	101558919	0.5105	3.935	4.6833	3.4524	0.4438	TT	1.6805	3.2157
	1308	GY_C_2016	FASTmrMLM	Kukri_c100613_331	7D	112431129	0.3756	4.939	5.7327	10.3906	0.4658	CC	0.6486	1.1659
	1309	GY_C_2016	pLARmEB	Kukri_c100613_331	7D	112431129	0.45	8.1334	9.0288	16.7557	0.4658	CC	0.4718	1.1659
	1310	KUtE_T_2018	FASTmrMLM	CAP7_c9278_185	7D	146106813	-0.0003	7.4625	8.3402	0.0081	0.0393	AA	0.0001	0.0001
	1311	KUtE_T_2018	pLARmEB	CAP7_c9278_185	7D	146106813	-0.0004	5.5462	6.3633	0.0213	0.0393	AA	0	0.0001
	1312	KUtE_T_2018	FASTmrMLM	wsnp_Ex_c17346_26030825	7D	370181380	0.0003	12.5457	13.5313	0.0598	0.1966	CC	0.0001	0.0001
	1313	SW_T_H	FASTmrMLM	Kukri_c58234_519	7D	413246857	-0.002	9.2771	10.1998	0.3234	0.236	CC	0.0003	0.001
	1314	SW_T_H	FASTmrMLM	Ex_c8238_637	7D	461205902	-0.0009	8.6955	9.6047	0.0713	0.382	TT	0.0003	0.001
	1315	KUtE_C_2017	FASTmrMLM	BS00067285_51	7D	591204218	0.0009	3.7358	4.4739	0.2285	0.0843	AA	0	0.0001
	1316	DM_T_2018	mrMLM	Tdurum_contig5360_95	7D	600451347	1.9695	5.5066	6.32221	14.8848	0.3391	G	12.533	18.4308
	1317	DM_T_2018	FASTmrMLM	Tdurum_contig5360_95	7D	600451347	1.0445	3.119	3.8218	4.6039	0.3315	GG	10.3267	18.4308
	1318	HI_T_2017	FASTmrEMMA	Kukri_c9068_691	7D	621264310	0.0323	3.1613	3.8667	1.4497	0.4719	AA	0.0106	0.0155
	1319	KUE_C_2018	FASTmrMLM	BobWhite_c4240_78	7D	634694320	-0.0012	11.3092	12.2732	0.6131	0.4831	AG	0	0
	*Trait nomenclature is presented in Table 2 legends.

## Sheet: Table S6b
	Table S6. MTA identified by multi-locus GWAS models.
	Sno	Trait*	Method	SNP Name	Chr	Marker Position (bp)	QTN effect	LOD score	-log10p	r2 (%)	MAF	Genotype for code 1	Var_Error	Var_phen (total)
	1	FW_T_H	FASTmrMLM	wsnp_RFL_Contig4735_5673999	1A	7658364	-9.592e-05	8.251	9.1494	0.0032	0.4888	TT	0.0001	0.0003
	2	FW_T_H	FASTmrMLM	Excalibur_c25050_372	1A	27260788	-0.0003	8.9171	9.8316	0.0262	0.3258	CC	0.0001	0.0003
	3	KUE_T_2018	pLARmEB	Excalibur_c47654_70	1A	49097391	-0.0005	11.938	12.9132	0.3639	0.264	GG	0	0.0001
	4	KUE_T_2018	pLARmEB	RAC875_c10659_1539	1A	57764926	0.0003	6.5208	7.3708	0.0314	0.0674	CC	0	0.0001
	5	CHL_B_C_2017	pLARmEB	wsnp_Ku_rep_c107796_93118214	1A	73313141	-1.577	6.0842	6.9201	9.0177	0.0899	CC	3.2492	6.3638
	6	KUtE_C_2017	pLARmEB	wsnp_Ex_c44049_50205904	1A	337678122	-0.0017	9.3357	10.2597	1.1276	0.1573	GG	0	0.0001
	7	NA_C_H	pLARmEB	RAC875_c41113_144	1A	343410529	-2.0589	5.1412	5.9429	12.9992	0.1685	CC	11.7684	16.5406
	8	Na+_C_H	pLARmEB	RAC875_c41113_144	1A	343410529	-2.0589	5.1412	5.9429	12.9992	0.1685	CC	11.7684	16.5406
	9	FW_T_H	FASTmrMLM	Ex_c5192_943	1A	485002381	-0.0009	11.6745	12.6452	0.1878	0.1629	TT	0.0001	0.0003
	10	SpL_C_2018	pLARmEB	Ex_c5192_943	1A	485002381	0.3903	5.9427	6.7738	4.8699	0.1629	TT	0.3848	1.2931
	11	KUtE_C_2017	pLARmEB	wsnp_Ku_c21316_31053745	1A	498141636	0.0006	9.1152	10.0342	0.1833	0.2809	TT	0	0.0001
	12	KUtE_C_2017	pLARmEB	wsnp_Ku_c1642_3232242	1A	507079382	0.0011	14.3228	15.3525	0.7915	0.3652	TT	0	0.0001
	13	KUE_C_2017	FASTmrMLM	Kukri_c31891_1355	1A	508640934	0.0006	14.2884	15.3525	0.8896	0.3933	AA	0	0
	14	KUE_C_2017	FASTmrMLM	Kukri_rep_c109473_80	1A	514138353	0.0006	8.0027	8.8948	0.8479	0.4213	CC	0	0
	15	GY_C_2017	FASTmrMLM	Excalibur_c29605_535	1A	520579915	0.5014	7.5706	8.4512	19.0841	0.4607	CC	0.8921	1.2273
	16	KUE_C_2017	FASTmrMLM	Excalibur_c29605_535	1A	520579915	0.0008	6.4286	7.2757	1.7869	0.4607	CC	0	0
	17	SpS_C_2018	FASTmrMLM	BobWhite_c23632_322	1A	539762835	-1.2078	6.0962	6.9325	13.2578	0.2584	AA	3.9069	6.6588
	18	SpS_C_2018	pLARmEB	BobWhite_c23632_322	1A	539762835	-1.3821	8.0827	8.9768	20.5043	0.2584	AA	3.7576	6.6588
	19	KUE_C_2017	pLARmEB	BS00095510_51	1A	543961391	0.0005	9.7311	10.6637	0.6463	0.2753	AA	0	0
	20	KUtE_T_2017	pLARmEB	BS00078085_51	1A	544055625	0.0006	7.9388	8.8292	0.3487	0.2809	TT	0	0.0001
	21	KUE_C_2018	FASTmrMLM	wsnp_BE494527A_Ta_2_1	1A	547299571	-0.0005	15.084	15.9546	0.5681	0.2978	TT	0	0
	22	FW_T_H	pLARmEB	tplb0021i12_383	1A	568025559	0.0003	5.7948	6.6208	0.0164	0.2247	TT	0.0001	0.0003
	23	KUE_C_2018	FASTmrMLM	RAC875_c23586_541	1A	568417022	-0.0008	7.3457	8.2201	1.1103	0.1573	GG	0	0
	24	BY_C_2016	pLARmEB	Excalibur_c17320_833	1A	575228804	0.5343	6.1449	6.9828	10.8323	0.3288	TT	0.9318	2.0545
	25	KUE_C_2017	FASTmrMLM	wsnp_Ex_c48407_53323483	1A	579864880	-0.0003	7.5846	8.4656	0.0871	0.1742	TT	0	0
	26	KUtE_C_2017	pLARmEB	RAC875_c52947_338	1A	580496484	-0.0007	14.5166	15.4775	0.1787	0.0843	TC	0	0.0001
	27	KUE_C_2017	FASTmrMLM	wsnp_Ra_c6891_11974621	1A	581585520	0.0004	10.7226	11.6754	0.1766	0.1461	TT	0	0
	28	KUtE_C_2017	pLARmEB	wsnp_Ra_c6891_11974621	1A	581585520	0.0009	10.3421	11.2874	0.2098	0.1461	TT	0	0.0001
	29	FW_C_H	FASTmrMLM	RAC875_c62550_470	1A	583894934	0.0018	5.1509	5.953	0.602	0.2865	TT	0.0001	0.0005
	30	PH_T_2018	FASTmrMLM	IAAV1301	1A	589874399	-2.3503	5.7162	6.5394	10.6595	0.3989	AA	32.7052	51.2913
	31	KUE_C_2018	pLARmEB	Kukri_c43479_207	1A	590343100	-0.0004	11.5904	12.5594	0.4757	0.264	AA	0	0
	32	TN_T_2017	FASTmrMLM	Tdurum_contig47006_1105	1A	593549077	-0.1693	5.0673	5.8661	26.022	0.1685	TT	0.037	0.0817
	33	TN_T_2017	mrMLM	Tdurum_contig47006_1105	1A	593549077	-0.1922	5.7176	6.54083	29.4676	0.1724	T	0.0302	0.0817
	34	KUE_C_2017	FASTmrMLM	RAC875_c48669_292	1B	1524033	0.0006	8.9646	9.8802	0.1561	0.0843	GG	0	0
	35	KUE_T_2017	pLARmEB	GENE-1118_1049	1B	8222519	8.8697e-05	11.9943	12.9705	0.0073	0.0506	TT	0	0
	36	KUtE_T_2017	FASTmrMLM	BS00022319_51	1B	57430658	0.0002	9.9494	10.8866	0.0393	0.4663	TC	0	0.0001
	37	KUtE_T_2017	pLARmEB	BS00022319_51	1B	57430658	-0.0003	12.0351	13.0121	0.1477	0.4663	TC	0	0.0001
	38	KUtE_T_2017	pLARmEB	BS00066014_51	1B	59514595	-0.0011	8.8236	9.7359	1.5766	0.4382	AG	0	0.0001
	39	KUtE_T_2017	FASTmrMLM	BS00066014_51	1B	59514595	-0.0006	9.0076	9.9241	0.4722	0.4382	AG	0	0.0001
	40	KUE_T_2018	pLARmEB	Excalibur_c6952_263	1B	69823889	-0.0005	10.4417	11.389	0.0791	0.0506	AA	0	0.0001
	41	KUtE_T_2018	pLARmEB	Excalibur_c6952_263	1B	69823889	-0.0006	13.1376	14.135	0.0494	0.0506	AA	0	0.0001
	42	KUE_T_2018	FASTmrMLM	Ra_c69176_1308	1B	107136692	0.0005	5.4116	6.2237	0.1409	0.0787	TT	0	0.0001
	43	FW_C_H	FASTmrMLM	Excalibur_c32472_263	1B	108218026	-0.0005	13.6626	14.6758	0.0039	0.0112	AA	0.0001	0.0005
	44	KUE_C_2017	FASTmrMLM	wsnp_Ku_c9144_15396815	1B	119099248	3.5143e-05	11.1886	12.1503	0.0001	0.0056	CC	0	0
	45	BY_T_2017	mrMLM	Kukri_c19641_477	1B	275672539	5.7686	10.2861	11.2302	49.4641	0.4943	C	0.5311	1.3418
	46	K_T_2017	mrMLM	Kukri_c19641_477	1B	275672539	117.424	8.603	9.51003	59.4116	0.4943	C	274.224	528.921
	47	KUpE_T_2017	mrMLM	Kukri_c19641_477	1B	275672539	1.3047	8.603	9.51003	59.4116	0.4943	C	0.0339	0.0653
	48	KUtE_T_2018	FASTmrMLM	wsnp_Ex_c17238_25895129	1B	300950124	9.0582e-05	13.7462	14.7505	0.0008	0.0169	GG	0.0001	0.0001
	49	FW_T_H	FASTmrMLM	Ra_c11303_359	1B	379383435	0.0002	5.1781	5.9813	0.0007	0.0112	CC	0.0001	0.0003
	50	SW_T_H	FASTmrMLM	IACX11291	1B	530959722	0.0007	8.9565	9.8719	0.0332	0.3427	AA	0.0003	0.001
	51	HI_C_2017	FASTmrMLM	wsnp_Ku_c34980_44256215	1B	545644564	0.0074	7.6389	8.5214	0.3891	0.118	GG	0.0026	0.0046
	52	KUE_T_2018	pLARmEB	wsnp_JD_c6331_7499060	1B	548967983	-0.0002	11.9074	12.882	0.0109	0.0787	TT	0	0.0001
	53	CHL_B_C_2017	mrMLM	wsnp_Ex_c5098_9047611	1B	548971423	1.9955	6.0142	6.84771	20.4768	0.1149	A	4.8903	6.3638
	54	KUtE_T_2018	pLARmEB	Excalibur_c16203_451	1B	555298082	0.0009	6.3853	7.231	0.3424	0.118	TT	0	0.0001
	55	BY_C_2016	pLARmEB	IACX11274	1B	576024228	-0.6713	7.2996	8.1727	12.0131	0.2123	GG	0.9318	2.0545
	56	LA_C_2016	mrMLM	BS00034012_51	1B	583983571	-3.214	5.8942	6.72361	25.7277	0.0643	G	6.0176	9.1241
	57	LA_T_2016	mrMLM	BS00034012_51	1B	583983571	-3.2499	6.1218	6.95892	27.185	0.0643	G	4.8203	11.7197
	58	FW_T_H	FASTmrMLM	Excalibur_c581_1220	1B	624506208	-0.0004	7.5857	8.4667	0.0518	0.3708	AA	0.0001	0.0003
	59	FW_T_H	FASTmrMLM	Tdurum_contig67656_387	1B	626085427	-0.0014	13.0425	14.0355	0.6522	0.3483	GG	0.0001	0.0003
	60	FW_T_H	FASTmrMLM	BobWhite_c9881_1312	1B	626713811	0.0002	10.3162	11.261	0.0051	0.1517	AA	0.0001	0.0003
	61	FW_C_H	FASTmrMLM	RAC875_c839_352	1B	632421148	-0.003	5.532	6.3485	1.8301	0.3933	AA	0.0001	0.0005
	62	SpL_C_2017	pLARmEB	tplb0043a07_880	1B	637622677	0.3809	6.3611	7.206	12.7622	0.427	AA	0.5281	0.8283
	63	SpS_T_2017	FASTmrMLM	tplb0043a07_880	1B	637622677	0.4101	5.0117	5.8083	7.0159	0.427	AA	0.8788	2.3605
	64	KUtE_C_2018	pLARmEB	BobWhite_c19733_301	1B	641552767	0.0009	10.1841	11.1262	0.5933	0.3315	AA	0	0.0001
	65	FW_T_H	pLARmEB	RAC875_c3057_2297	1B	658495308	0.0004	10.6509	11.6023	0.0293	0.2079	TT	0.0001	0.0003
	66	KUE_C_2018	FASTmrMLM	Tdurum_contig29087_628	1B	661633325	0.0001	11.5226	12.4904	0.0169	0.1067	AA	0	0
	67	KUtE_T_2017	FASTmrMLM	CAP7_rep_c6352_375	1B	668912357	-0.0003	6.5664	7.4178	0.0195	0.0225	GG	0	0.0001
	68	KUtE_T_2017	pLARmEB	CAP7_rep_c6352_375	1B	668912357	-0.0002	14.7235	15.6536	0.0043	0.0225	GG	0	0.0001
	69	KUE_C_2017	pLARmEB	BS00063418_51	1D	513174	0.0004	10.5132	11.4619	0.1465	0.0955	CC	0	0
	70	KUE_C_2017	FASTmrMLM	BS00063418_51	1D	513174	0.0005	14.2358	15.2556	0.2704	0.0955	CC	0	0
	71	KUE_T_2017	pLARmEB	wsnp_CAP12_c55_32598	1D	2103061	5.7614e-05	13.098	14.0913	0.0004	0.0225	GG	0	0
	72	KUE_C_2018	FASTmrMLM	BS00047515_51	1D	2588483	0.0002	13.2485	14.247	0.0253	0.1573	CC	0	0
	73	KUtE_C_2018	pLARmEB	RAC875_rep_c105796_617	1D	7876699	0.0007	6.0728	6.9083	0.3436	0.2697	TT	0	0.0001
	74	KUtE_T_2018	pLARmEB	RAC875_c10387_685	1D	11399886	-0.001	14.6652	15.6536	0.5409	0.3652	AC	0	0.0001
	75	KUE_T_2017	pLARmEB	BS00011205_51	1D	52345479	-0.0005	5.734	6.5578	0.6387	0.4551	GG	0	0
	76	KUtE_C_2017	FASTmrMLM	Kukri_c32885_145	1D	261741663	-0.001	7.1411	8.0097	0.3856	0.1629	TT	0	0.0001
	77	FW_T_H	pLARmEB	Kukri_c13458_226	1D	336365267	-0.0002	6.544	7.3947	0.002	0.0562	CC	0.0001	0.0003
	78	FW_T_H	FASTmrMLM	Kukri_c13458_226	1D	336365267	-0.0007	10.9266	11.8834	0.044	0.0562	CC	0.0001	0.0003
	79	HI_C_2017	FASTmrMLM	Kukri_c13458_226	1D	336365267	0.0002	7.0105	7.8753	0.0002	0.0562	CC	0.0026	0.0046
	80	RL_C_H	pLARmEB	Kukri_c13458_226	1D	336365267	-4.7783	6.588	7.4401	5.7501	0.0562	CC	19.0034	33.8137
	81	FW_T_H	FASTmrMLM	IAAV4656	1D	357459758	0.0006	9.598	10.5277	0.1259	0.309	CC	0.0001	0.0003
	82	FW_T_H	pLARmEB	IAAV4656	1D	357459758	0.0003	12.8293	13.8211	0.0281	0.309	CC	0.0001	0.0003
	83	KUE_T_2018	pLARmEB	BobWhite_c39092_629	1D	470894146	-0.0003	10.2918	11.2361	0.0888	0.2191	CC	0	0.0001
	84	KUE_C_2018	pLARmEB	BS00063512_51	1D	485708741	0.0001	6.3312	7.1752	0.0192	0.073	TT	0	0
	85	KUE_T_2018	pLARmEB	RFL_Contig2961_1806	1D	493485518	-0.0004	10.3096	11.2542	0.1715	0.3933	CC	0	0.0001
	86	NA_C_H	mrMLM	BS00018347_51	2A	12469121	-7.1132	5.5672	6.38503	19.787	0.0172	A	6.8329	16.5406
	87	Na+_C_H	mrMLM	BS00018347_51	2A	12469121	-7.1132	5.5672	6.38503	19.787	0.0172	A	6.8329	16.5406
	88	KUE_T_2017	pLARmEB	GENE-1086_1111	2A	12961300	0.0001	13.5332	14.5396	0.0231	0.0674	AA	0	0
	89	KUE_T_2018	FASTmrMLM	IACX10973	2A	13409094	-0.0003	12.864	13.8542	0.0216	0.0225	CC	0	0.0001
	90	FW_T_H	FASTmrMLM	BS00065110_51	2A	31088889	0.0015	11.2545	12.2174	0.1314	0.0506	AA	0.0001	0.0003
	91	NA_T_H	pLARmEB	Tdurum_contig560_239	2A	72382644	113155	5.5461	6.3632	26.0669	0.3539	AA	2.33418e+10	3.19381e+10
	92	RW_T_H	mrMLM	Tdurum_contig560_239	2A	72382644	-0.8838	8.4722	9.37605	38.4622	0.3563	A	0.5649	1.1757
	93	CHL_21DAG_T_H	mrMLM	Ra_c22724_810	2A	182301716	2.2605	6.7615	7.61892	54.1225	0.3678	A	3.7359	5.307
	94	PH_T_2016	pLARmEB	Kukri_c57491_132	2A	502335158	-7.3626	7.9118	8.8015	22.3701	0.1575	GG	62.1009	108.48
	95	BY_T_2016	FASTmrMLM	Excalibur_c1793_97	2A	558953000	-0.7638	6.1168	6.9538	18.1799	0.2466	AA	2.2092	2.7023
	96	HI_T_2016	pLARmEB	wsnp_CAP11_rep_c8469_3658252	2A	570002495	5.2218	6.6507	7.5047	10.5043	0.1575	GG	50.1635	142.625
	97	FW_T_H	FASTmrMLM	BS00026377_51	2A	576657262	0.0003	5.1793	5.9825	0.0049	0.0281	AA	0.0001	0.0003
	98	KUE_T_2018	pLARmEB	IAAV80	2A	603687063	-0.0003	11.3596	12.3245	0.0709	0.1292	AA	0	0.0001
	99	KUtE_C_2018	pLARmEB	BS00062679_51	2A	615287757	0.0002	9.4924	10.4198	0.0101	0.0506	GG	0	0.0001
	100	SL_T_H	pLARmEB	Excalibur_c74376_158	2A	631640920	-3.1397	5.1791	5.9823	14.5727	0.0506	TT	4.7007	8.3768
	101	SL_T_H	mrMLM	Excalibur_c74376_158	2A	631640920	-3.5212	7.5488	8.42884	33.0074	0.0517	T	4.0911	8.3768
	102	KUtE_T_2017	FASTmrMLM	Ra_c26702_797	2A	701482423	-8.0565e-05	6.2571	7.0987	0.0004	0.0056	CC	0	0.0001
	103	Na+_T_2018	pLARmEB	Excalibur_c65910_246	2A	712308171	-55.8473	5.561	6.3786	41.6631	0.4888	TC	302.626	424.758
	104	FW_T_H	FASTmrMLM	Excalibur_c25380_113	2A	713197623	0.0011	6.1418	6.9796	0.0539	0.0337	GG	0.0001	0.0003
	105	KUE_C_2017	FASTmrMLM	wsnp_Ra_c3378_6318431	2A	723525913	0.0001	5.5178	6.3338	0.0291	0.2022	CC	0	0
	106	KUE_C_2017	FASTmrMLM	BS00057060_51	2A	729288358	-0.0004	8.1924	9.0893	0.4007	0.4494	AA	0	0
	107	RL_C_2018	pLARmEB	Tdurum_contig10574_864	2A	732585393	4.5327	8.5275	9.4327	4.7794	0.1067	AA	22.6434	86.267
	108	RL_C_2018	mrMLM	wsnp_Ex_c5740_10081171	2A	740848305	-4.089	6.4758	7.32439	12.3199	0.3621	A	36.3012	86.267
	109	KUE_T_2018	pLARmEB	BS00010098_51	2A	743096823	-0.0005	8.8859	9.7996	0.2499	0.1629	GG	0	0.0001
	110	FW_T_H	FASTmrMLM	BS00023144_51	2A	744329367	0.0005	8.5156	9.4205	0.0999	0.2921	TC	0.0001	0.0003
	111	FW_T_H	pLARmEB	BS00023144_51	2A	744329367	0.0002	8.9033	9.8174	0.0141	0.2921	TC	0.0001	0.0003
	112	SW_T_H	FASTmrMLM	Tdurum_contig56321_232	2A	758514679	-0.0004	6.7909	7.6492	0.0145	0.3146	CC	0.0003	0.001
	113	KUE_T_2018	FASTmrMLM	Tdurum_contig52350_636	2A	759830158	-0.0008	5.0893	5.889	0.3672	0.4831	TC	0	0.0001
	114	KUE_T_2018	pLARmEB	Tdurum_contig52350_636	2A	759830158	-0.0013	5.9596	6.7913	0.9452	0.4831	TC	0	0.0001
	115	KUpE_C_2017	pLARmEB	Ex_c6937_1992	2A	761540385	-0.0179	5.5504	6.3676	0.7734	0.2191	TT	0.0103	0.0177
	116	BY_T_2017	pLARmEB	BobWhite_c11479_157	2A	764657398	0.5334	5.0112	5.8078	4.0491	0.3989	GG	0.6625	1.3418
	117	BY_T_2017	FASTmrMLM	BobWhite_c11479_157	2A	764657398	0.6246	5.7047	6.5275	5.4649	0.3989	GG	0.6519	1.3418
	118	KUE_T_2017	pLARmEB	BobWhite_c11479_157	2A	764657398	0.0016	9.52	10.448	2.0228	0.3989	GG	0	0
	119	TN_T_2017	mrMLM	BobWhite_c11479_157	2A	764657398	0.201	7.1016	7.96908	12.4786	0.3908	G	0.0302	0.0817
	120	TN_T_2017	FASTmrMLM	BobWhite_c11479_157	2A	764657398	0.1711	7.867	8.7555	10.2872	0.3989	GG	0.037	0.0817
	121	TN_T_2017	pLARmEB	BobWhite_c11479_157	2A	764657398	0.183	10.7292	11.6821	7.3071	0.3989	GG	0.0421	0.0817
	122	FW_C_H	FASTmrMLM	RAC875_rep_c69411_672	2A	766396323	-0.0003	6.4092	7.2557	0.0045	0.0281	GG	0.0001	0.0005
	123	KUE_T_2017	pLARmEB	Tdurum_contig45196_487	2A	770411323	0.0007	7.6835	8.5672	0.8085	0.4101	AG	0	0
	124	KUtE_T_2017	pLARmEB	Ex_c72358_240	2A	773710553	-0.0001	6.5154	7.3652	0.002	0.0169	AA	0	0.0001
	125	RL_C_2018	FASTmrMLM	BS00107857_51	2A	774855770	2.9609	5.0317	5.8291	6.9667	0.3315	AA	29.9338	86.267
	126	RL_C_2018	pLARmEB	BS00107857_51	2A	774855770	2.641	5.0606	5.8592	4.0421	0.3315	AA	22.6434	86.267
	127	KUE_T_2018	pLARmEB	BS00044332_51	2B	2109772	0.0003	11.6191	12.5887	0.1078	0.4326	CC	0	0.0001
	128	FW_T_H	pLARmEB	wsnp_Ra_c1501_2991585	2B	6338084	0.0004	7.5875	8.4686	0.0436	0.4438	AA	0.0001	0.0003
	129	HI_C_2017	FASTmrMLM	Excalibur_c42248_663	2B	6715690	5.4162e-05	6.2904	7.1331	6.351e-05	0.4831	GG	0.0026	0.0046
	130	KUE_T_2017	pLARmEB	BS00065927_51	2B	8344509	0.0002	5.2163	6.021	0.1171	0.1742	TT	0	0
	131	KUE_C_2017	pLARmEB	Excalibur_c1787_1037	2B	16827640	-0.0004	7.3134	8.1869	0.3228	0.4831	AA	0	0
	132	SW_T_H	FASTmrMLM	BS00109330_51	2B	24264552	0.0017	6.5809	7.4328	0.2801	0.3483	GG	0.0003	0.001
	133	KUE_T_2017	pLARmEB	Kukri_rep_c103530_251	2B	27088810	0.0003	13.473	14.4775	0.114	0.1573	CC	0	0
	134	NA_T_H	mrMLM	GENE-0592_268	2B	35284538	-170729	5.2352	6.04059	26.1974	0.4828	A	1.47395e+10	3.19381e+10
	135	NA_T_H	FASTmrMLM	GENE-0592_268	2B	35284538	-144963	5.2352	6.0406	22.1182	0.4831	AC	1.83575e+10	3.19381e+10
	136	RL_T_H	FASTmrMLM	GENE-0592_268	2B	35284538	-5.2559	6.017	6.8506	25.2548	0.4831	AC	17.5446	35.6113
	137	RL_T_H	pLARmEB	GENE-0592_268	2B	35284538	-5.9022	7.8078	8.6948	31.3196	0.4831	AC	17.0923	35.6113
	138	RW_T_H	pLARmEB	GENE-0592_268	2B	35284538	1.1338	9.3304	10.2543	27.9302	0.4831	AC	0.4896	1.1757
	139	CHL_21DAG_T_H	FASTmrMLM	GENE-0592_127	2B	35284667	-2.2015	6.279	7.1213	27.4275	0.4888	AG	3.5302	5.307
	140	CHL_21DAG_T_H	pLARmEB	GENE-0592_127	2B	35284667	-2.2711	6.5561	7.4072	30.4155	0.4888	AG	2.9667	5.307
	141	Chl_C_2018	mrMLM	BS00093755_51	2B	44424386	-1.4392	7.2267	8.09777	10.9731	0.431	C	9.8525	12.9157
	142	Chl_C_2018	FASTmrMLM	Tdurum_contig11379_1047	2B	46090653	-1.3496	5.6739	6.4956	11.5571	0.4551	CC	7.608	12.9157
	143	KUtE_C_2017	pLARmEB	Kukri_rep_c107572_121	2B	68365389	-0.0005	5.1261	5.9272	0.0849	0.1124	CC	0	0.0001
	144	KUE_T_2018	pLARmEB	Tdurum_contig94176_65	2B	71292465	0.001	12.3145	13.2966	1.6183	0.4831	GG	0	0.0001
	145	FW_T_H	pLARmEB	BS00071690_51	2B	105375830	-0.0013	5.9373	6.7682	0.2908	0.1461	AA	0.0001	0.0003
	146	KUE_T_2017	pLARmEB	Excalibur_c23723_141	2B	161409209	-0.0003	12.1433	13.1221	0.0576	0.0787	TT	0	0
	147	KUE_T_2017	pLARmEB	BobWhite_c948_52	2B	180616389	0.0004	6.8388	7.6985	0.4974	0.4607	GG	0	0
	148	SpL_C_2018	FASTmrMLM	BobWhite_c948_52	2B	180616389	-0.354	5.011	5.8076	9.6919	0.4607	GG	0.7264	1.2931
	149	SpL_C_2018	pLARmEB	BobWhite_c948_52	2B	180616389	-0.2842	5.2065	6.0108	3.8452	0.4607	GG	0.3848	1.2931
	150	KUE_C_2017	pLARmEB	wsnp_Ku_c2562_4879681	2B	190225573	-0.0001	9.685	10.6166	0.0351	0.4888	GG	0	0
	151	KUE_C_2017	FASTmrMLM	wsnp_Ku_c2562_4879681	2B	190225573	-0.0006	12.5872	13.5744	0.9159	0.4888	GG	0	0
	152	KUtE_C_2017	pLARmEB	wsnp_Ku_c2562_4879681	2B	190225573	-0.001	14.1701	15.1764	0.7146	0.4888	GG	0	0.0001
	153	SW_C_H	FASTmrMLM	wsnp_Ra_c2842_5399988	2B	202917263	-0.0004	5.1509	5.953	0.0023	0.0337	CC	0.0004	0.0007
	154	KUE_C_2017	FASTmrMLM	Kukri_c32980_680	2B	202917573	-0.0002	13.0384	14.0303	0.11	0.264	CC	0	0
	155	KUtE_T_2018	FASTmrMLM	BS00078506_51	2B	210842836	4.6187e-05	7.0395	7.9052	0.0002	0.0169	TT	0.0001	0.0001
	156	KUE_C_2017	pLARmEB	Excalibur_c12278_1301	2B	246068638	-0.0007	14.93	15.9546	1.28	0.4719	GG	0	0
	157	KUE_C_2017	FASTmrMLM	Ex_c7628_2392	2B	412665461	0.0003	11.3216	12.2857	0.2383	0.1461	CC	0	0
	158	KUE_T_2017	pLARmEB	BS00066545_51	2B	452811270	0.0002	6.3656	7.2107	0.0936	0.236	GG	0	0
	159	SW_T_H	FASTmrMLM	Ra_c21042_617	2B	456025580	-0.0001	14.5616	15.6536	0.0009	0.1461	AA	0.0003	0.001
	160	SW_T_H	FASTmrMLM	BobWhite_c7326_70	2B	456172645	-0.0006	13.8992	14.9132	0.0197	0.1404	TT	0.0003	0.001
	161	KUE_C_2017	FASTmrMLM	Excalibur_c99477_90	2B	456176969	1.4829e-05	5.641	6.4615	0.0003	0.118	CC	0	0
	162	KUtE_C_2017	pLARmEB	Excalibur_c99477_90	2B	456176969	0.0002	6.5944	7.4467	0.0115	0.118	CC	0	0.0001
	163	HI_C_2017	FASTmrMLM	BobWhite_c40428_349	2B	462936127	0.0001	5.0552	5.8535	0.0004	0.2697	TT	0.0026	0.0046
	164	KUE_C_2017	FASTmrMLM	BS00064698_51	2B	467489872	-0.0004	11.4858	12.453	0.2067	0.0899	AA	0	0
	165	KUtE_T_2018	FASTmrMLM	Tdurum_contig61682_187	2B	476407676	-0.0003	9.4536	10.3802	0.0295	0.1124	AA	0.0001	0.0001
	166	KUE_C_2018	FASTmrMLM	wsnp_Ex_c10838_17631243	2B	598971364	-0.0001	5.4738	6.2882	0.007	0.0337	CC	0	0
	167	KUtE_T_2017	FASTmrMLM	Ex_c2510_477	2B	612066212	0.0003	5.0409	5.8387	0.038	0.073	GG	0	0.0001
	168	KUtE_T_2017	FASTmrMLM	Tdurum_contig31911_195	2B	646417390	0.0003	5.3904	6.2017	0.0355	0.0674	GG	0	0.0001
	169	SW_T_H	FASTmrMLM	Tdurum_contig96648_102	2B	694055722	0.0066	5.7151	6.5382	2.9878	0.3989	TT	0.0003	0.001
	170	SpS_C_2017	FASTmrEMMA	BS00046164_51	2B	697510323	-1.5022	5.3998	6.2115	17.6234	0.3539	AA	1.8631	2.6043
	171	SpS_C_2017	mrMLM	BS00046164_51	2B	697510323	-0.8897	5.5186	6.33465	28.0827	0.3621	A	1.9531	2.6043
	172	SpS_T_2017	FASTmrMLM	BS00046164_51	2B	697510323	-0.5232	5.736	6.5599	11.1753	0.3539	AA	0.8788	2.3605
	173	SpS_T_2017	pLARmEB	BS00046164_51	2B	697510323	-0.6178	6.4351	7.2824	15.215	0.3539	AA	1.0983	2.3605
	174	KUtE_T_2017	pLARmEB	BS00046165_51	2B	697510334	0.0004	10.6009	11.5513	0.1923	0.3483	CC	0	0.0001
	175	SpL_C_2018	pLARmEB	BobWhite_c2521_117	2B	699106259	0.5409	7.0398	7.9055	11.5237	0.3764	AG	0.3848	1.2931
	176	DM_T_2018	FASTmrMLM	Tdurum_contig29246_118	2B	700741357	-3.4888	6.5778	7.4296	30.4727	0.4551	TC	10.3267	18.4308
	177	DM_T_2018	pLARmEB	Tdurum_contig29246_118	2B	700741357	-3.6265	8.0427	8.9358	16.3919	0.4551	TC	8.5267	18.4308
	178	KUE_T_2018	pLARmEB	Excalibur_c60964_203	2B	708436706	-0.0003	13.7693	14.7785	0.0132	0.0281	CC	0	0.0001
	179	KUtE_C_2018	pLARmEB	Tdurum_contig12660_192	2B	719803663	-0.0003	13.9288	14.9546	0.0776	0.4607	CC	0	0.0001
	180	FW_C_H	FASTmrMLM	BobWhite_c26329_71	2B	725961243	0.0004	6.0673	6.9026	0.0074	0.0337	GG	0.0001	0.0005
	181	KUtE_C_2017	pLARmEB	RAC875_c26697_589	2B	743736791	-0.0001	6.8145	7.6735	0.0058	0.2865	TC	0	0.0001
	182	HI_C_2017	FASTmrMLM	RAC875_c98387_130	2B	766233839	5.6954e-05	14.9981	15.9546	5.7327e-05	0.2697	CC	0.0026	0.0046
	183	SpL_T_2018	pLARmEB	BS00064836_51	2B	774831016	-0.3882	7.2374	8.1088	6.4777	0.3989	GG	0.5799	1.4719
	184	KUtE_C_2017	pLARmEB	Ex_c5327_1731	2B	776977952	0.0003	6.4747	7.3233	0.0095	0.0393	AA	0	0.0001
	185	KUE_C_2017	pLARmEB	Excalibur_c26527_178	2B	777143613	0.0002	14.6792	15.6536	0.033	0.0506	GG	0	0
	186	KUtE_C_2017	pLARmEB	BS00022478_51	2B	783226928	-0.0008	6.2402	7.0812	0.4503	0.4438	GG	0	0.0001
	187	KUE_C_H	FASTmrMLM	BS00067878_51	2B	784621033	0.1992	5.9462	6.7774	18.5397	0.4607	AG	0.0867	0.1318
	188	FW_T_H	FASTmrMLM	BS00056645_51	2B	793148630	-0.0007	11.6648	12.6353	0.0487	0.0843	TT	0.0001	0.0003
	189	KUE_T_2018	pLARmEB	GENE-0676_322	2B	801222392	0.001	9.1561	10.076	1.1815	0.2079	GG	0	0.0001
	190	TN_C_2018	pLARmEB	Kukri_c19266_779	2D	2470497	-0.2869	5.5384	6.3552	7.545	0.3371	AA	0.2965	0.6647
	191	FW_T_H	FASTmrMLM	RAC875_c5577_1682	2D	6636121	-0.0007	8.3015	9.2011	0.0278	0.0393	CC	0.0001	0.0003
	192	FW_T_H	pLARmEB	RAC875_c5577_1682	2D	6636121	-0.0002	10.5025	11.451	0.0016	0.0393	CC	0.0001	0.0003
	193	SW_T_H	FASTmrMLM	RAC875_c5577_1682	2D	6636121	-0.0015	6.4084	7.2549	0.0403	0.0393	CC	0.0003	0.001
	194	KUE_T_2018	FASTmrMLM	wsnp_Ex_rep_c80588_75758453	2D	8717230	0.0002	13.3665	14.3635	0.0318	0.0562	GG	0	0.0001
	195	FW_T_H	pLARmEB	CAP8_c6474_94	2D	11460138	3.6852e-05	6.2124	7.0525	5.1928e-05	0.0225	TT	0.0001	0.0003
	196	KUE_C_2017	FASTmrMLM	BobWhite_c15073_502	2D	14395525	0.0004	13.39	14.3864	0.1696	0.073	CC	0	0
	197	KUE_T_2018	FASTmrMLM	BobWhite_c15073_502	2D	14395525	0.0004	5.4457	6.2591	0.1187	0.073	CC	0	0.0001
	198	KUE_T_2018	pLARmEB	BobWhite_c15073_502	2D	14395525	0.0003	5.7227	6.5461	0.0615	0.073	CC	0	0.0001
	199	KUtE_T_2018	pLARmEB	Ex_c14755_1390	2D	20769509	0.0003	13.7211	14.7241	0.0752	0.2921	GG	0	0.0001
	200	KUtE_T_2018	pLARmEB	Excalibur_c20196_264	2D	29879871	-0.0002	15.1999	15.9546	0.0037	0.0393	TT	0	0.0001
	201	KUtE_T_2017	FASTmrMLM	Kukri_rep_c110868_147	2D	97275522	0.0003	6.2374	7.0783	0.0923	0.2191	CC	0	0.0001
	202	KUtE_T_2018	pLARmEB	Tdurum_contig11768_756	2D	127115471	-0.0003	7.3546	8.2293	0.0529	0.2022	AA	0	0.0001
	203	SW_T_H	FASTmrMLM	Kukri_c10054_567	2D	128399271	0.0016	5.1212	5.9222	0.2578	0.4607	AA	0.0003	0.001
	204	KUtE_C_2017	pLARmEB	RAC875_c20366_376	2D	330738253	0.0002	9.8012	10.7353	0.0247	0.1854	CC	0	0.0001
	205	TKW_T_2017	pLARmEB	BS00076042_51	2D	602109336	-2.5163	5.4139	6.2261	21.3356	0.1798	TT	11.6758	17.2984
	206	TKW_T_2017	FASTmrMLM	BS00076042_51	2D	602109336	-2.5278	5.4747	6.2891	24.2938	0.1798	TT	11.2489	17.2984
	207	FW_T_H	pLARmEB	D_GDS7LZN02G73QS_245	2D	614751087	0.001	14.4881	15.4775	0.3224	0.4045	TT	0.0001	0.0003
	208	HI_C_2017	FASTmrMLM	RAC875_c5673_1209	2D	622382766	0.0033	8.8567	9.7697	0.1957	0.2303	CC	0.0026	0.0046
	209	KUtE_T_2018	FASTmrMLM	RAC875_c31328_381	2D	629208199	0.0001	6.7603	7.6177	0.0019	0.0337	AA	0.0001	0.0001
	210	KUtE_C_2017	pLARmEB	BobWhite_c16248_216	2D	633851769	0.0007	11.0472	12.0062	0.0868	0.0449	GG	0	0.0001
	211	KUtE_T_2018	pLARmEB	Kukri_c5276_801	2D	641603804	0.0001	14.0996	15.1095	0.0048	0.1011	AA	0	0.0001
	212	KUE_T_2017	pLARmEB	BS00065434_51	2D	647665734	-0.0002	12.3783	13.3613	0.0704	0.427	AG	0	0
	213	KUE_T_2017	pLARmEB	BobWhite_rep_c64888_511	3A	7476485	0.0001	5.6131	6.4326	0.0446	0.2584	CC	0	0
	214	KUtE_T_2017	FASTmrMLM	Excalibur_c60530_113	3A	10586827	0.0002	8.4738	9.3777	0.0352	0.4719	TT	0	0.0001
	215	KUtE_T_2017	FASTmrMLM	Kukri_c54593_543	3A	13354520	0.0007	7.1685	8.0379	0.6293	0.4101	TT	0	0.0001
	216	KUE_C_2018	pLARmEB	wsnp_Ex_c55051_57706127	3A	25359161	-0.0005	8.1869	9.0837	0.4807	0.2135	CC	0	0
	217	KUtE_T_2018	FASTmrMLM	IAAV5729	3A	36921408	0.0002	14.5223	15.4775	0.0239	0.1292	TC	0.0001	0.0001
	218	KUE_T_2017	pLARmEB	wsnp_Ex_c4094_7399975	3A	46165751	-0.0006	12.0442	13.0211	0.4326	0.1124	GG	0	0
	219	KUE_T_2017	pLARmEB	RAC875_c2464_274	3A	56676041	0.0002	13.224	14.2222	0.1002	0.2135	CC	0	0
	220	KUtE_T_H	pLARmEB	JD_c356_431	3A	517662054	-0.4032	5.858	6.6862	10.2494	0.0618	AA	0.1485	0.2473
	221	KUtE_T_H	FASTmrMLM	Kukri_c36200_1000	3A	544394535	-0.3166	5.4141	6.2263	18.4521	0.1011	GG	0.1514	0.2473
	222	KUE_C_2018	pLARmEB	Ku_c53625_627	3A	561118774	-6.9943e-05	5.4443	6.2576	0.0125	0.3876	AA	0	0
	223	KUtE_T_2018	FASTmrMLM	wsnp_Ex_c11877_19055556	3A	578873757	4.8684e-05	14.562	15.6536	0.0002	0.0112	TT	0.0001	0.0001
	224	KUE_C_2017	FASTmrMLM	Ku_c61039_131	3A	605847997	-0.0002	7.5008	8.3795	0.0159	0.0337	AA	0	0
	225	KUE_C_2017	pLARmEB	Ku_c61039_131	3A	605847997	-0.0002	9.8214	10.7559	0.0173	0.0337	AA	0	0
	226	KUtE_C_2017	pLARmEB	BS00067748_51	3A	641407220	-0.001	12.785	13.7756	0.1908	0.0506	CC	0	0.0001
	227	KUE_C_2018	pLARmEB	JD_c52237_348	3A	663176268	0.0001	12.3217	13.3033	0.0042	0.0225	TT	0	0
	228	KUE_C_2017	pLARmEB	Kukri_c18258_440	3A	714425105	0.0002	6.9213	7.7835	0.0381	0.1461	TT	0	0
	229	KUE_C_2017	FASTmrMLM	Kukri_c18258_440	3A	714425105	0.0005	6.9643	7.8278	0.3599	0.1461	TT	0	0
	230	KUtE_C_2017	FASTmrMLM	Kukri_c18258_440	3A	714425105	-0.0005	8.3006	9.2002	0.1054	0.1461	TT	0	0.0001
	231	FW_T_H	FASTmrMLM	BS00065673_51	3A	721666010	-0.0007	6.6831	7.5381	0.0323	0.0449	AA	0.0001	0.0003
	232	HI_T_2017	FASTmrMLM	BobWhite_c29014_241	3A	727072931	-1.7987e-05	7.418	8.2944	2.7193e-07	0.0281	CC	0.0108	0.0155
	233	FW_T_H	FASTmrMLM	Ra_c7114_619	3A	727399261	-0.0009	7.3075	8.1809	0.2936	0.3933	GG	0.0001	0.0003
	234	HI_T_2017	FASTmrMLM	RAC875_c99055_69	3A	728322677	0.0299	5.3207	6.1294	4.8857	0.3258	TT	0.0108	0.0155
	235	SL_C_H	mrMLM	GENE-2081_34	3A	735891449	-3.1961	9.1378	10.0573	35.2227	0.1437	C	7.4302	13.692
	236	SL_C_H	pLARmEB	GENE-2081_34	3A	735891449	-2.8702	9.7763	10.7099	9.8325	0.1404	CC	6.6	13.692
	237	KUtE_T_2017	pLARmEB	CAP7_c915_121	3A	736388750	0.0001	6.7384	7.5951	0.0194	0.4326	AA	0	0.0001
	238	RW_C_H	FASTmrMLM	wsnp_Ku_c5359_9530161	3A	744436134	-0.5081	5.5018	6.3172	11.6827	0.4888	AA	1.2747	2.1234
	239	RW_C_H	pLARmEB	wsnp_Ku_c5359_9530161	3A	744436134	-0.5081	5.842	6.6696	10.4547	0.4888	AA	1.2743	2.1234
	240	KUE_C_2018	FASTmrMLM	tplb0028p23_691	3B	2519487	-0.0005	10.2455	11.1888	0.2544	0.0674	GG	0	0
	241	FW_T_H	FASTmrMLM	wsnp_Ra_c41135_48426638	3B	3408685	-0.0015	9.7825	10.7162	0.4321	0.4213	CC	0.0001	0.0003
	242	KUtE_C_2018	pLARmEB	Tdurum_contig47506_495	3B	4328329	0.0002	8.1084	9.0032	0.0137	0.0787	GG	0	0.0001
	243	KUtE_C_2018	pLARmEB	CAP7_c4121_370	3B	6250719	0.0003	5.32	6.1286	0.0841	0.1854	CC	0	0.0001
	244	TN_T_2017	mrMLM	BobWhite_c9992_862	3B	6395435	-0.1185	6.0731	6.90859	10.9666	0.2989	A	0.0302	0.0817
	245	HI_T_2017	FASTmrMLM	RAC875_c76367_523	3B	10709748	2.6601e-05	6.2688	7.1108	3.6882e-06	0.3146	AA	0.0108	0.0155
	246	KUtE_C_2017	FASTmrMLM	RAC875_c21604_1625	3B	13964016	0.0034	5.57	6.3879	5.5593	0.4045	CC	0	0.0001
	247	TN_C_2018	pLARmEB	RAC875_c34649_1053	3B	13967077	-0.726	7.5062	8.3851	28.2169	0.4326	TG	0.2965	0.6647
	248	KUE_T_2017	pLARmEB	Tdurum_contig22897_107	3B	24942898	0.0002	10.2889	11.2331	0.0262	0.1011	AA	0	0
	249	RL_T_2017	mrMLM	BS00011806_51	3B	35322028	7.9884	5.4151	6.22732	14.1971	0.2394	C	57.1283	107.424
	250	RL_T_2017	FASTmrMLM	BS00011806_51	3B	35322028	6.4165	6.3793	7.2248	9.781	0.2466	CC	66.0556	107.424
	251	FW_T_H	pLARmEB	BS00068168_51	3B	35634072	-8.3085e-05	6.0071	6.8404	0.0003	0.0169	GG	0.0001	0.0003
	252	SW_T_H	FASTmrMLM	Tdurum_contig81690_353	3B	66180408	-0.0012	6.0068	6.8401	0.0588	0.0787	AA	0.0003	0.001
	253	KUpE_C_2017	pLARmEB	BobWhite_c9850_306	3B	296502406	0.0276	6.5855	7.4375	1.969	0.4719	AA	0.0103	0.0177
	254	CHL_14DAG_T_H	pLARmEB	BobWhite_c17332_325	3B	457978554	1.33	6.4739	7.3224	15.9382	0.2303	GG	4.0403	7.9209
	255	KUE_C_2018	FASTmrMLM	wsnp_Ex_c1116_2138756	3B	462099622	0.0009	10.7723	11.7261	1.7403	0.1573	TT	0	0
	256	KUtE_C_2018	pLARmEB	wsnp_Ex_c1116_2138756	3B	462099622	0.0006	7.4118	8.2881	0.2643	0.1573	TT	0	0.0001
	257	FW_T_H	FASTmrMLM	RAC875_c29367_314	3B	467335886	-0.0015	7.1677	8.0371	0.368	0.073	GG	0.0001	0.0003
	258	FW_C_H	FASTmrMLM	IACX11310	3B	586512242	0.0006	9.7865	10.7203	0.0574	0.2697	CC	0.0001	0.0005
	259	FW_C_H	FASTmrMLM	wsnp_Ex_c17407_26107953	3B	681100205	-0.0013	10.0103	10.9488	0.0835	0.0618	CC	0.0001	0.0005
	260	PH_T_2017	pLARmEB	wsnp_Ex_c19778_28779907	3B	739170520	1.5955	5.7087	6.5316	3.5035	0.4326	GG	14.2695	34.5645
	261	KUtE_C_2018	pLARmEB	TA002070-0603-w	3B	761005338	-0.0009	5.5461	6.3632	0.5384	0.191	TT	0	0.0001
	262	KUtE_T_2018	FASTmrMLM	wsnp_CAP12_c2297_1121142	3B	783466186	0.0005	5.752	6.5764	0.1554	0.2079	CC	0.0001	0.0001
	263	FW_T_H	FASTmrMLM	Tdurum_contig11114_335	3B	822828858	-0.0004	12.1078	13.0859	0.004	0.0112	AA	0.0001	0.0003
	264	KUE_T_2017	pLARmEB	Excalibur_c57482_473	3D	2596417	-0.0004	6.1983	7.038	0.2588	0.1517	AA	0	0
	265	KUtE_C_2017	pLARmEB	Excalibur_c18826_452	3D	2597073	0.0024	8.9395	9.8545	0.1785	0.5	AG	0	0.0001
	266	KUE_T_2017	pLARmEB	wsnp_JD_c5170_6293946	3D	3301384	-0.0016	10.8227	11.7775	1.936	0.4831	AA	0	0
	267	KUE_C_2018	pLARmEB	BobWhite_rep_c49779_74	3D	92749990	-0.0001	5.8675	6.696	0.0136	0.0449	TT	0	0
	268	FW_T_H	pLARmEB	wsnp_Ex_c18250_27065775	3D	122454668	-0.0001	9.5955	10.5252	0.0036	0.2865	TT	0.0001	0.0003
	269	DM_T_2018	pLARmEB	RAC875_c26039_1567	3D	584335777	3.2406	6.1293	6.9667	9.8478	0.0955	TT	8.5267	18.4308
	270	KUE_T_2017	pLARmEB	Tdurum_contig8061_56	4A	24764302	-8.7602e-05	14.1916	15.1764	0.0034	0.0393	TT	0	0
	271	FW_C_H	FASTmrMLM	wsnp_JD_c13364_13377722	4A	43698729	0.0118	12.8971	13.8901	12.7887	0.4382	TC	0.0001	0.0005
	272	FW_T_H	FASTmrMLM	Tdurum_contig9906_89	4A	45109781	-0.001	12.6432	13.6303	0.2757	0.236	CC	0.0001	0.0003
	273	FW_C_H	FASTmrMLM	Ra_c492_1845	4A	46123570	0.002	9.5899	10.5195	0.6508	0.2528	CC	0.0001	0.0005
	274	FW_T_H	FASTmrMLM	BobWhite_c20514_70	4A	46172347	0.0001	5.9918	6.8246	0.0031	0.2191	AA	0.0001	0.0003
	275	PH_C_2018	mrMLM	wsnp_Ku_c11945_19406789	4A	231002068	2.3962	5.3492	6.15894	11.8121	0.4425	T	30.7549	45.1192
	276	KUE_C_2017	FASTmrMLM	BobWhite_c20183_318	4A	558216958	-0.0002	14.3461	15.3525	0.1074	0.2135	GG	0	0
	277	KUtE_T_2018	FASTmrMLM	Excalibur_c80450_75	4A	577863491	-0.0002	11.6213	12.591	0.0042	0.0449	AA	0.0001	0.0001
	278	BY_T_2018	FASTmrMLM	Tdurum_contig22511_355	4A	624123254	2.4989	5.7669	6.5919	39.7165	0.4663	AG	1.7883	2.9564
	279	KUE_C_2018	FASTmrMLM	Kukri_c35049_357	4A	625396699	-0.0007	13.6104	14.6122	0.7519	0.2303	GG	0	0
	280	KUtE_T_2018	FASTmrMLM	RAC875_c390_1494	4A	631575032	0.0007	6.4217	7.2686	0.0825	0.0506	CC	0.0001	0.0001
	281	KUtE_T_2017	pLARmEB	GENE-3129_436	4A	674554463	9.274e-05	8.7726	9.6837	0.0015	0.0281	AA	0	0.0001
	282	KUtE_T_2018	pLARmEB	Kukri_rep_c96828_86	4A	690970262	-0.0004	11.3236	12.2878	0.1062	0.2809	GG	0	0.0001
	283	RL_C_2018	pLARmEB	IAAV1106	4A	712597176	-2.5096	6.6295	7.4829	3.5682	0.3933	GG	22.6434	86.267
	284	KUtE_C_2018	pLARmEB	BobWhite_c3259_96	4A	724855804	0.0001	7.1008	7.9683	0.0105	0.3596	CC	0	0.0001
	285	KUtE_C_2018	pLARmEB	BS00081698_51	4A	733696286	-0.0003	7.5611	8.4415	0.0068	0.0169	CC	0	0.0001
	286	KUE_C_2018	FASTmrMLM	RAC875_s119811_122	4A	734017806	0.0002	5.0292	5.8265	0.0347	0.0787	AA	0	0
	287	KUE_T_2018	pLARmEB	Tdurum_contig42642_723	4A	737340693	-0.0003	13.8848	14.8754	0.0419	0.0506	AA	0	0.0001
	288	KUE_C_2018	FASTmrMLM	Kukri_c3866_718	4A	743952566	0.0004	6.285	7.1275	0.426	0.1685	TT	0	0
	289	KUtE_T_2018	pLARmEB	RAC875_c24030_136	4B	3733261	0.0009	6.1144	6.9513	0.0564	0.5	TC	0	0.0001
	290	SpL_C_2017	FASTmrMLM	BS00011510_51	4B	16056666	-0.3338	5.6577	6.4788	8.6854	0.2022	AA	0.3978	0.8283
	291	KUtE_T_2018	pLARmEB	Kukri_c49506_396	4B	17044001	0.0003	5.4586	6.2724	0.0139	0.0562	CC	0	0.0001
	292	KUtE_C_2017	FASTmrMLM	wsnp_Ra_c9823_16313377	4B	22848678	-0.0016	7.0876	7.9547	0.9389	0.1573	GG	0	0.0001
	293	KUtE_T_2018	pLARmEB	IACX5762	4B	65946277	2.5726e-05	13.3516	14.3525	4.229e-05	0.0112	AA	0	0.0001
	294	KUtE_C_2017	pLARmEB	Kukri_c52736_422	4B	446516808	-0.0004	6.3477	7.1922	0.028	0.0393	CC	0	0.0001
	295	KUtE_T_2018	FASTmrMLM	BS00094557_51	4B	548120919	-0.0007	11.3407	12.3053	0.1891	0.1573	TT	0.0001	0.0001
	296	KUtE_T_2018	FASTmrMLM	Excalibur_c23403_1118	4B	549134603	-0.0008	10.8915	11.8476	0.3035	0.1629	AA	0.0001	0.0001
	297	KUtE_T_2018	FASTmrMLM	wsnp_CAP12_rep_c4278_1949864	4B	552018251	-0.0008	5.4146	6.2268	0.2465	0.1742	AA	0.0001	0.0001
	298	KUE_T_2017	pLARmEB	BS00068456_51	4B	570893141	-0.0004	15.0062	15.9546	0.4135	0.4944	AA	0	0
	299	KUE_C_2018	pLARmEB	BS00023035_51	4B	636917337	-0.0003	6.0328	6.8669	0.0623	0.1011	GG	0	0
	300	RL_C_2018	pLARmEB	Kukri_c7241_322	4B	637387883	3.4551	5.0785	5.8778	2.5309	0.0955	GG	22.6434	86.267
	301	PH_C_2018	pLARmEB	wsnp_Ex_rep_c67159_65649966	4B	637390195	2.9011	7.6123	8.4941	15.072	0.3371	TT	21.0452	45.1192
	302	KUE_C_2017	FASTmrMLM	Kukri_rep_c101259_81	4B	657274231	0.0004	7.771	8.657	0.3723	0.2978	TT	0	0
	303	KUE_T_2017	pLARmEB	RAC875_c5802_144	4B	666049153	5.3507e-05	5.0644	5.8631	0.0054	0.1348	CC	0	0
	304	BY_T_2017	pLARmEB	BS00014101_51	4B	667685174	-0.8579	5.178	5.9812	9.2776	0.5	GG	0.6625	1.3418
	305	KUE_C_2018	pLARmEB	wsnp_BF145459D_Ta_2_1	4D	453220983	0.0001	5.6214	6.4412	0.0056	0.0337	GG	0	0
	306	KUE_C_2018	FASTmrMLM	wsnp_BF145459D_Ta_2_1	4D	453220983	0.0002	14.9489	15.9546	0.0101	0.0337	GG	0	0
	307	KUE_T_2017	pLARmEB	wsnp_BF145459D_Ta_2_1	4D	453220983	-7.5517e-05	11.6395	12.6094	0.0025	0.0337	GG	0	0
	308	SW_T_H	FASTmrMLM	wsnp_BF145459D_Ta_2_1	4D	453220983	0.0005	10.7424	11.6956	0.0045	0.0337	GG	0.0003	0.001
	309	RW_T_H	pLARmEB	Excalibur_rep_c109400_103	4D	461226413	-0.6823	5.2708	6.0776	6.9956	0.0562	CC	0.4896	1.1757
	310	Chl_C_2018	pLARmEB	RAC875_c47328_483	4D	494056241	1.3863	5.5666	6.3844	11.0389	0.309	CC	8.0584	12.9157
	311	Chl_C_2018	FASTmrMLM	RAC875_c47328_483	4D	494056241	1.4843	6.1772	7.0162	11.5752	0.309	CC	7.608	12.9157
	312	KUtE_T_2018	pLARmEB	GENE-3324_338	5A	3521325	-0.0005	9.9726	10.9103	0.2037	0.4607	GG	0	0.0001
	313	RL_T_H	pLARmEB	BS00101071_51	5A	8059402	-1.7814	5.6623	6.4836	7.8455	0.4944	AA	17.0923	35.6113
	314	RL_T_H	FASTmrMLM	BS00101071_51	5A	8059402	-1.9502	6.5007	7.3501	9.5613	0.4944	AA	17.5446	35.6113
	315	RW_T_H	pLARmEB	BS00101071_51	5A	8059402	0.2455	5.2505	6.0565	3.602	0.4944	AA	0.4896	1.1757
	316	FW_C_H	FASTmrMLM	wsnp_Ku_c9559_16000086	5A	8243590	-0.0009	5.4636	6.2776	0.1837	0.4045	CC	0.0001	0.0005
	317	KUE_T_2017	pLARmEB	BS00030991_51	5A	19268594	-6.0625e-05	7.2089	8.0795	0.0004	0.0112	CC	0	0
	318	KUtE_C_2018	pLARmEB	BS00030991_51	5A	19268594	-0.0002	11.897	12.8714	0.0009	0.0112	CC	0	0.0001
	319	KUE_C_2017	pLARmEB	Ku_c7910_1651	5A	20818412	3.1466e-05	14.3524	15.3525	0.0023	0.3315	TT	0	0
	320	KUtE_T_2018	pLARmEB	Excalibur_c5398_695	5A	30027274	-0.0028	8.8605	9.7736	5.2567	0.3989	GG	0	0.0001
	321	KUE_C_2018	pLARmEB	BS00078076_51	5A	409323859	-7.7457e-05	14.0051	15.0003	0.0039	0.0562	GG	0	0
	322	TN_C_2017	FASTmrMLM	BS00003618_51	5A	482119825	-0.1678	5.3924	6.2038	9.0076	0.382	CC	0.1409	0.2951
	323	TN_C_2017	pLARmEB	BS00003618_51	5A	482119825	-0.1918	8.8448	9.7576	11.7715	0.382	CC	0.1613	0.2951
	324	KUtE_T_2017	pLARmEB	BS00069176_51	5A	485598276	-0.0006	10.3064	11.251	0.4089	0.2191	TT	0	0.0001
	325	KUE_T_2018	FASTmrMLM	BobWhite_c5540_416	5A	519905749	-0.0002	7.6018	8.4833	0.0379	0.1011	AA	0	0.0001
	326	KUE_T_2017	pLARmEB	wsnp_Ex_c7487_12808011	5A	536677423	0.0002	7.9086	8.7982	0.077	0.4494	TT	0	0
	327	KUE_T_2018	pLARmEB	BobWhite_rep_c57159_360	5A	536677525	-0.0008	11.1591	12.1202	0.3596	0.0618	AA	0	0.0001
	328	KUE_T_2018	FASTmrMLM	RAC875_c103967_76	5A	537354458	-0.0003	6.7271	7.5835	0.0241	0.0449	AA	0	0.0001
	329	KUtE_C_2018	pLARmEB	Kukri_c20258_143	5A	540613173	0.0006	6.3655	7.2106	0.1529	0.1404	GG	0	0.0001
	330	PH_T_2017	pLARmEB	wsnp_Ex_c18941_27840714	5A	547647410	2.7187	7.3802	8.2556	6.9379	0.191	CC	14.2695	34.5645
	331	FW_T_H	pLARmEB	RAC875_rep_c91682_90	5A	558689050	0.0003	5.9021	6.7318	0.0159	0.1966	TT	0.0001	0.0003
	332	KUE_T_2018	FASTmrMLM	BobWhite_c14028_182	5A	571789596	-0.0012	11.1176	12.078	1.5449	0.191	AA	0	0.0001
	333	KUtE_T_2017	FASTmrMLM	Ex_c27046_1546	5A	574750070	-0.0006	7.9653	8.8564	0.0585	0.0337	CC	0	0.0001
	334	RL_T_H	pLARmEB	BobWhite_rep_c63332_67	5A	677845660	1.9239	5.5186	6.3347	7.7367	0.3539	CC	17.0923	35.6113
	335	RW_T_H	pLARmEB	BS00022299_51	5A	679740078	-0.254	5.9339	6.7647	3.7729	0.4438	CC	0.4896	1.1757
	336	KUtE_T_2018	pLARmEB	wsnp_CAP11_c1116_654975	5A	684939687	-0.0003	6.8149	7.6739	0.0779	0.3539	GG	0	0.0001
	337	KUtE_T_2017	pLARmEB	Ra_c11529_647	5A	685557599	0.0005	11.7293	12.7008	0.1792	0.1629	GG	0	0.0001
	338	KUE_T_2017	pLARmEB	Kukri_c16087_281	5A	702166101	0.0002	9.3266	10.2504	0.1094	0.3034	GG	0	0
	339	KUE_T_2018	pLARmEB	Tdurum_contig12204_1131	5A	705442972	0.0002	13.4127	14.4105	0.0101	0.0281	GG	0	0.0001
	340	KUtE_T_2017	pLARmEB	RAC875_rep_c114631_389	5B	16034591	-0.0012	10.5961	11.5464	1.8925	0.4775	CC	0	0.0001
	341	Na+_C_2018	pLARmEB	RAC875_c33933_350	5B	20671175	-8.8797	6.0881	6.9241	9.6732	0.2978	AA	269.54	509.913
	342	KUE_C_2018	FASTmrMLM	Excalibur_c13536_202	5B	34039822	-0.0002	11.4679	12.4348	0.0189	0.073	AA	0	0
	343	SpL_C_2018	pLARmEB	Excalibur_c13536_202	5B	34039822	-0.6575	6.461	7.3091	5.9653	0.073	AA	0.3848	1.2931
	344	KUtE_T_2017	pLARmEB	Kukri_c2827_439	5B	53662672	-0.0007	7.5741	8.4548	0.6424	0.4831	GG	0	0.0001
	345	KUE_C_2018	FASTmrMLM	RAC875_c45619_224	5B	64733088	-0.0001	5.0989	5.899	0.0053	0.0169	CC	0	0
	346	KUtE_T_2017	pLARmEB	RAC875_c45619_224	5B	64733088	-8.8351e-05	12.2149	13.1949	0.0013	0.0169	CC	0	0.0001
	347	KUtE_T_2017	pLARmEB	BobWhite_c4852_323	5B	68358991	-0.0002	9.0182	9.935	0.0127	0.0674	GG	0	0.0001
	348	Zn_T_2017	pLARmEB	Excalibur_c7286_975	5B	72099969	2.2318	5.0072	5.8036	16.0851	0.3933	GG	19.9421	30.0386
	349	Zn_T_2017	FASTmrMLM	Excalibur_c7286_975	5B	72099969	2.4761	5.7416	6.5657	15.5922	0.3933	GG	20.1347	30.0386
	350	Na+_C_2018	pLARmEB	wsnp_Ex_c13496_21243167	5B	74999804	8.179	6.0019	6.835	10.4161	0.427	GG	269.54	509.913
	351	KUtE_C_2017	FASTmrMLM	Ku_c32395_173	5B	176580625	-0.0015	9.5173	10.4453	0.3376	0.0506	CC	0	0.0001
	352	KUtE_C_2018	pLARmEB	wsnp_Ex_rep_c66881_65284662	5B	342873656	-0.0003	5.789	6.6148	0.0783	0.3483	AA	0	0.0001
	353	BY_C_2016	pLARmEB	wsnp_Ex_c2615_4862266	5B	475586840	0.7851	7.5825	8.4635	12.5313	0.1644	CC	0.9318	2.0545
	354	RL_C_2018	mrMLM	RFL_Contig4751_1197	5B	482291047	16.2251	6.3467	7.19118	18.2644	0.0172	T	36.3012	86.267
	355	KUtE_T_2018	pLARmEB	Kukri_c34340_391	5B	508778825	-0.0002	7.9655	8.8566	0.0008	0.0112	CC	0	0.0001
	356	CHL_T_2016	mrMLM	BobWhite_c6633_395	5B	531599374	-16.4162	5.1422	5.94398	60.1873	0.4859	C	19.0005	26.2812
	357	KUE_C_2018	FASTmrMLM	Ku_c2346_1339	5B	536515270	0.0002	8.4331	9.336	0.026	0.0506	TT	0	0
	358	KUE_C_2018	pLARmEB	Ku_c2346_1339	5B	536515270	0.0001	15.0691	15.9546	0.0094	0.0506	TT	0	0
	359	KUtE_T_2017	pLARmEB	Ku_c2346_1339	5B	536515270	0.0005	8.6192	9.5266	0.1006	0.0506	TT	0	0.0001
	360	FW_T_H	FASTmrMLM	wsnp_Ex_c3834_6971712	5B	536516487	-0.0013	5.7368	6.5607	0.1044	0.0449	AA	0.0001	0.0003
	361	KUtE_C_2017	pLARmEB	Tdurum_contig10210_428	5B	550728917	0.0004	11.8592	12.833	0.0241	0.0562	AA	0	0.0001
	362	KUE_T_2018	FASTmrMLM	BS00029915_51	5B	558346572	-0.0003	5.7685	6.5935	0.0113	0.0281	AA	0	0.0001
	363	KUtE_C_2017	pLARmEB	BS00029915_51	5B	558346572	0.0011	5.2551	6.0613	0.0765	0.0281	AA	0	0.0001
	364	KUtE_T_2017	pLARmEB	IAAV1888	5B	586352242	-0.0003	5.7644	6.5893	0.0858	0.1011	AG	0	0.0001
	365	KUtE_T_2018	pLARmEB	Excalibur_c100531_251	5B	591108072	-0.0008	6.335	7.1791	0.2128	0.1854	GG	0	0.0001
	366	KUtE_C_2018	pLARmEB	Tdurum_contig50731_961	5B	617709959	-0.0006	13.852	14.8754	0.1187	0.0899	TT	0	0.0001
	367	KUE_T_2018	pLARmEB	Tdurum_contig97407_196	5B	647940863	0.0002	14.1002	15.1095	0.0166	0.0393	TT	0	0.0001
	368	KUpE_T_H	FASTmrMLM	BS00064272_51	5B	656713538	0.2048	5.6728	6.4944	8.9069	0.236	AA	0.2302	0.304
	369	Na+_T_2017	mrMLM	Tdurum_contig8210_317	5B	669483487	0.9544	5.3557	6.16569	9.0809	0.2299	G	4.6961	6.58
	370	GY_T_2017	FASTmrMLM	RAC875_rep_c111379_703	5B	669550549	-0.1867	5.2276	6.0327	6.2041	0.264	AA	0.2076	0.3102
	371	KUE_T_2017	FASTmrMLM	RAC875_rep_c111379_703	5B	669550549	-0.002	6.2576	7.0992	8.3253	0.264	AA	0	0
	372	HI_T_2017	FASTmrMLM	wsnp_CAP12_c2231_1090724	5B	672594804	-0.0308	5.4461	6.2595	5.8274	0.4607	CC	0.0108	0.0155
	373	KUtE_T_2017	pLARmEB	wsnp_JD_c8978_9893945	5B	679347089	-0.0014	14.0518	15.0515	1.9011	0.1685	CC	0	0.0001
	374	KUE_T_2018	pLARmEB	Excalibur_c54637_123	5B	689375749	-0.0002	9.1727	10.093	0.0214	0.0506	AA	0	0.0001
	375	KUE_T_2018	FASTmrMLM	Excalibur_c54637_123	5B	689375749	-0.0004	10.1571	11.0986	0.0564	0.0506	AA	0	0.0001
	376	FW_T_H	pLARmEB	Ra_c3287_1405	5B	695492536	-0.0076	9.9672	10.9048	7.9767	0.1011	CC	0.0001	0.0003
	377	KUE_T_2018	pLARmEB	Ku_c10913_2542	5B	695778572	0.0003	6.8069	7.6657	0.0852	0.1517	AA	0	0.0001
	378	KUE_C_2018	FASTmrMLM	RAC875_c65269_290	5B	702624831	-7.5221e-05	6.5646	7.416	0.0143	0.2528	GG	0	0
	379	KUtE_T_2018	pLARmEB	RAC875_c37988_243	5B	712851517	-0.0002	6.0668	6.9021	0.019	0.2191	TT	0	0.0001
	380	KUE_C_2017	pLARmEB	JG_c1426_201	5B	712907184	-0.0001	11.8037	12.7765	0.0025	0.0169	CC	0	0
	381	FW_T_H	FASTmrMLM	Kukri_c9358_269	5D	9732395	7.0046e-05	5.7762	6.6015	0.001	0.1292	CC	0.0001	0.0003
	382	PH_C_2018	pLARmEB	Kukri_c9358_269	5D	9732395	3.9159	7.0023	7.8669	19.0507	0.1292	CC	21.0452	45.1192
	383	KUtE_C_2017	pLARmEB	wsnp_JD_c43684_30430706	5D	188335587	0.0004	5.2208	6.0256	0.0182	0.0393	TT	0	0.0001
	384	KUE_C_2018	pLARmEB	wsnp_Ex_c14182_22122844	5D	320888516	0.0006	6.9913	7.8556	0.7121	0.3539	TT	0	0
	385	KUE_T_2018	pLARmEB	Kukri_c805_325	5D	386652270	-0.0009	7.9924	8.8842	1.3191	0.4382	GG	0	0.0001
	386	KUtE_T_2018	pLARmEB	Kukri_c805_325	5D	386652270	-0.0008	13.1208	14.1157	0.4651	0.4382	GG	0	0.0001
	387	KUtE_T_2018	FASTmrMLM	RAC875_c20530_1159	5D	478466774	-0.0001	6.8053	7.664	0.0014	0.0225	TT	0.0001	0.0001
	388	KUtE_T_2018	pLARmEB	RAC875_c20530_1159	5D	478466774	-8.7757e-05	6.9813	7.8453	0.0007	0.0225	TT	0	0.0001
	389	KUE_C_2017	pLARmEB	BS00066224_51	5D	526451415	0.0003	9.6421	10.5728	0.1215	0.1292	GG	0	0
	390	KUtE_C_2018	pLARmEB	BS00089078_51	5D	549579051	0.0017	7.3394	8.2136	2.2482	0.4382	CC	0	0.0001
	391	KUtE_T_2018	pLARmEB	Excalibur_c16376_351	6A	4769490	0.0007	13.5621	14.5566	0.18	0.4157	AG	0	0.0001
	392	KUE_C_2018	FASTmrMLM	Ex_c2978_643	6A	12387144	9.6043e-05	13.3116	14.3111	0.0187	0.3596	AA	0	0
	393	KUE_C_2018	pLARmEB	Excalibur_c64989_250	6A	12392149	0.0005	7.5175	8.3967	0.5355	0.3315	CC	0	0
	394	KUE_C_2018	FASTmrMLM	Excalibur_c64989_250	6A	12392149	0.0011	13.7354	14.7505	3.0442	0.3315	CC	0	0
	395	KUtE_C_2018	pLARmEB	Excalibur_c64989_250	6A	12392149	0.0013	5.8304	6.6576	1.2647	0.3315	CC	0	0.0001
	396	FW_T_H	FASTmrMLM	Kukri_rep_c69659_71	6A	13074556	-0.0002	7.0557	7.9219	0.007	0.1292	AA	0.0001	0.0003
	397	SL_T_H	mrMLM	wsnp_Ex_c52849_56297163	6A	13076345	-1.8855	5.0635	5.86217	15.0137	0.1034	G	4.0911	8.3768
	398	FW_T_H	FASTmrMLM	wsnp_Ku_rep_c69659_69084797	6A	13076478	-0.0007	12.876	13.8682	0.092	0.1348	GG	0.0001	0.0003
	399	TN_C_2017	pLARmEB	Excalibur_c49745_628	6A	18464388	0.1656	5.4685	6.2827	4.6343	0.1348	GG	0.1613	0.2951
	400	BY_T_2017	mrMLM	GENE-4142_882	6A	20767997	-1.3737	7.8031	8.68996	13.3873	0.046	T	0.5311	1.3418
	401	NA_C_H	mrMLM	Kukri_c7458_1332	6A	23722752	3.6219	6.9528	7.81594	33.9611	0.1609	A	6.8329	16.5406
	402	Na+_C_H	mrMLM	Kukri_c7458_1332	6A	23722752	3.6219	6.9528	7.81594	33.9611	0.1609	A	6.8329	16.5406
	403	KUE_C_2018	pLARmEB	wsnp_JD_c3441_4455541	6A	24829659	-1.1062e-05	5.1128	5.9134	0.0003	0.3989	AA	0	0
	404	KUtE_T_2018	pLARmEB	wsnp_Ex_c15378_23638822	6A	49193147	0.0002	10.5377	11.4869	0.0338	0.2978	CC	0	0.0001
	405	HI_C_2017	FASTmrMLM	Excalibur_c6057_281	6A	63775433	0.0002	8.8508	9.7637	0.0005	0.4157	TT	0.0026	0.0046
	406	KUE_C_2018	pLARmEB	wsnp_Ex_c29025_38097560	6A	70428095	0.0005	12.2292	13.2095	0.6155	0.3034	CC	0	0
	407	FW_T_H	pLARmEB	Jagger_c8372_125	6A	71181774	-0.0006	6.0264	6.8603	0.0385	0.2584	GG	0.0001	0.0003
	408	HI_C_2017	FASTmrMLM	Excalibur_c30324_564	6A	73642303	0.0002	7.5427	8.4226	0.0005	0.3596	GG	0.0026	0.0046
	409	KUE_C_2018	FASTmrMLM	BobWhite_c4255_127	6A	210950123	-0.0002	10.1468	11.0881	0.0259	0.0843	CC	0	0
	410	FW_T_H	FASTmrMLM	Kukri_c16868_1062	6A	335780010	0.0009	7.4193	8.2958	0.0741	0.0787	CC	0.0001	0.0003
	411	FW_T_H	FASTmrMLM	CAP8_c8024_128	6A	492282338	0.0004	8.7114	9.621	0.0465	0.2416	CC	0.0001	0.0003
	412	FW_T_H	FASTmrMLM	IAAV1652	6A	544204977	6.0438e-05	5.7855	6.6111	0.0011	0.2809	AA	0.0001	0.0003
	413	BY_C_2017	FASTmrMLM	wsnp_Ex_c48789_53586502	6A	550073992	-1.2444	5.2139	6.0185	22.7306	0.3989	CC	4.6515	6.5541
	414	BY_C_2017	pLARmEB	wsnp_Ex_c48789_53586502	6A	550073992	-1.2444	5.2139	6.0185	23.2509	0.3989	CC	4.6515	6.5541
	415	BY_C_2017	mrMLM	wsnp_Ex_c48789_53586502	6A	550073992	-1.276	6.4027	7.24897	23.9023	0.408	C	5.1044	6.5541
	416	KUE_C_2017	pLARmEB	wsnp_Ex_c48789_53586502	6A	550073992	-0.0001	10.615	11.5657	0.0557	0.3989	CC	0	0
	417	KUE_C_2017	pLARmEB	wsnp_Ex_c48789_53586406	6A	550074242	-0.0002	12.7164	13.7042	0.0948	0.3933	CC	0	0
	418	KUtE_C_2018	pLARmEB	RAC875_c26820_847	6A	573123775	-0.0003	5.4291	6.2418	0.0211	0.0449	TT	0	0.0001
	419	KUtE_C_2017	pLARmEB	Excalibur_c55844_143	6A	600456991	0.0006	13.9909	15.0003	0.0678	0.0674	CC	0	0.0001
	420	KUtE_C_2017	pLARmEB	wsnp_JD_rep_c65886_41872083	6A	608632185	0.0018	6.8661	7.7267	1.5494	0.2472	TT	0	0.0001
	421	KUE_C_2018	pLARmEB	Excalibur_c9754_1428	6A	609257585	0.0006	6.3099	7.1532	0.7548	0.3483	GG	0	0
	422	KUE_C_2018	FASTmrMLM	wsnp_Ra_c13998_21994095	6A	615458409	-0.0003	5.869	6.6975	0.0678	0.0955	AA	0	0
	423	KUE_C_2018	pLARmEB	wsnp_Ra_c13998_21994095	6A	615458409	-0.0005	12.0528	13.0303	0.195	0.0955	AA	0	0
	424	FW_T_H	FASTmrMLM	BS00082893_51	6B	166226	0.0024	8.1881	9.0849	0.6541	0.4663	AG	0.0001	0.0003
	425	KUtE_T_2017	pLARmEB	BS00075789_51	6B	1969989	-0.0001	11.801	12.7739	0.0239	0.4494	GG	0	0.0001
	426	Chl_T_2018	pLARmEB	Tdurum_contig42655_1727	6B	12671291	3.3374	5.1877	5.9913	7.1155	0.1124	CC	20.5111	35.9326
	427	KUtE_T_2018	pLARmEB	Tdurum_contig29033_75	6B	67937993	-8.8627e-05	6.2651	7.1069	0.0005	0.0169	CC	0	0.0001
	428	KUE_C_2018	FASTmrMLM	CAP8_c1361_225	6B	91167467	0.0002	5.175	5.9781	0.0291	0.0393	CC	0	0
	429	KUE_T_2018	pLARmEB	Kukri_rep_c113626_110	6B	103785098	-0.0019	9.416	10.3418	1.7058	0.0787	AA	0	0.0001
	430	KUtE_T_2018	pLARmEB	Kukri_rep_c113626_110	6B	103785098	-0.0009	11.5242	12.492	0.1888	0.0787	AA	0	0.0001
	431	SW_T_H	FASTmrMLM	wsnp_Ra_c57648_59682822	6B	181102991	0.0009	5.8276	6.6547	0.0724	0.2472	GG	0.0003	0.001
	432	KUE_T_2018	pLARmEB	BS00022772_51	6B	240543564	0.0004	15.1782	15.9546	0.047	0.0337	GG	0	0.0001
	433	KUtE_T_2018	FASTmrMLM	BS00022772_51	6B	240543564	0.0002	11.1665	12.1278	0.0036	0.0337	GG	0.0001	0.0001
	434	KUE_C_2017	FASTmrMLM	Tdurum_contig55473_381	6B	582825019	-0.0001	7.4791	8.3572	0.0078	0.073	CC	0	0
	435	HI_C_2017	FASTmrMLM	Tdurum_contig50382_639	6B	604217180	7.695e-05	11.1785	12.14	0.0001	0.3652	CC	0.0026	0.0046
	436	KUE_T_2018	FASTmrMLM	Kukri_c9150_1181	6B	653883840	-0.0004	12.5462	13.5313	0.0178	0.0225	GG	0	0.0001
	437	CHL_C_2016	pLARmEB	RAC875_c4030_1595	6B	706118794	7.618	6.8933	7.7547	8.7259	0.0274	CC	11.7635	29.6459
	438	KUE_C_2018	pLARmEB	Kukri_c19309_1803	6B	715953504	-0.0022	11.4149	12.3808	1.6107	0.5	TC	0	0
	439	KUtE_C_2018	pLARmEB	Kukri_c19309_1803	6B	715953504	-0.0006	8.8879	9.8017	0.0367	0.5	TC	0	0.0001
	440	KUE_C_2018	FASTmrMLM	Excalibur_c4789_2748	6D	1413329	0.0002	9.4846	10.4119	0.0272	0.0337	CC	0	0
	441	KUE_T_2017	pLARmEB	Kukri_c21405_2131	6D	2406212	0.0003	14.3253	15.3525	0.1233	0.1629	GG	0	0
	442	SpL_T_2017	pLARmEB	BobWhite_c7090_123	6D	5065255	0.2737	5.1309	5.9322	10.1479	0.3483	TT	0.3041	0.7225
	443	KUtE_T_2018	FASTmrMLM	BS00021970_51	6D	24003436	-0.0001	14.4044	15.4775	0.0016	0.0337	GG	0.0001	0.0001
	444	KUtE_T_2018	pLARmEB	RAC875_c26177_632	6D	26245017	0.0002	8.3769	9.2784	0.0285	0.3202	AA	0	0.0001
	445	KUE_C_2018	FASTmrMLM	BobWhite_c15526_58	6D	129522614	-0.0001	11.3522	12.3169	0.0024	0.0169	GG	0	0
	446	FW_C_H	FASTmrMLM	IAAV7251	6D	309588003	0.0022	6.1501	6.9882	0.3317	0.073	CC	0.0001	0.0005
	447	Na+_C_2018	pLARmEB	IAAV7251	6D	309588003	12.5449	5.259	6.0653	8.0196	0.073	CC	269.54	509.913
	448	KUE_C_2018	FASTmrMLM	RAC875_rep_c111047_466	6D	380488735	-0.0002	6.8855	7.7466	0.008	0.0169	TT	0	0
	449	FW_T_H	FASTmrMLM	Excalibur_rep_c105550_175	6D	397353234	0.0012	12.6954	13.6827	0.0641	0.0281	CC	0.0001	0.0003
	450	TN_C_2017	pLARmEB	Jagger_c7132_108	6D	461923722	0.3997	5.729	6.5526	4.7554	0.4888	CC	0.1613	0.2951
	451	KUE_C_2018	pLARmEB	GENE-3993_284	6D	462464731	0.0006	5.3635	6.1738	0.6359	0.3315	AA	0	0
	452	KUE_T_2018	FASTmrMLM	Kukri_c41086_105	6D	468910518	-0.0006	5.6862	6.5083	0.2588	0.0787	GG	0	0.0001
	453	HI_T_2017	mrMLM	Ra_c8058_1047	6D	469831336	-0.2036	5.5609	6.3785	36.5782	0.023	T	0.0123	0.0155
	454	FW_C_H	FASTmrMLM	CAP7_c2559_543	6D	471017889	0.0028	10.2132	11.1559	1.6321	0.2753	GG	0.0001	0.0005
	455	KUtE_C_2017	pLARmEB	Kukri_c44291_138	6D	471070735	0.0009	7.644	8.5266	0.3077	0.1573	AA	0	0.0001
	456	SpL_C_2018	pLARmEB	RFL_Contig2615_982	6D	472890145	0.4844	7.9677	8.8589	5.5745	0.1348	CC	0.3848	1.2931
	457	DM_C_2018	mrMLM	GENE-3593_37	7A	1699666	-7.4764	6.3598	7.2047	34.9355	0.0172	A	8.1918	12.7866
	458	DM_C_2018	FASTmrMLM	GENE-3593_37	7A	1699666	-6.6441	6.3607	7.2056	27.2718	0.0169	AA	7.6177	12.7866
	459	DM_C_2018	pLARmEB	GENE-3593_37	7A	1699666	-6.6437	6.3607	7.2056	8.9513	0.0169	AA	7.6171	12.7866
	460	FW_T_H	pLARmEB	GENE-3593_37	7A	1699666	2.8541e-05	10.0781	11.018	2.1006e-05	0.0169	AA	0.0001	0.0003
	461	FW_C_H	FASTmrMLM	BobWhite_c20558_374	7A	6537017	0.0014	7.0168	7.8818	0.3305	0.2135	GG	0.0001	0.0005
	462	SpL_C_2018	pLARmEB	Tdurum_contig13245_443	7A	10908619	-0.4957	6.4953	7.3445	6.5584	0.1236	GG	0.3848	1.2931
	463	KUtE_T_2017	pLARmEB	RAC875_c48202_231	7A	12177316	0.0008	11.6277	12.5974	0.7545	0.4663	GG	0	0.0001
	464	SW_T_H	FASTmrMLM	Excalibur_c9183_1397	7A	12411398	0.0005	9.38	10.305	0.0084	0.073	TT	0.0003	0.001
	465	KUE_C_2018	FASTmrMLM	BS00021122_51	7A	14734883	-0.0003	11.1389	12.0997	0.061	0.073	GG	0	0
	466	KUtE_C_2017	pLARmEB	BS00078400_51	7A	31875862	0.0047	8.5815	9.488	4.3581	0.4719	TT	0	0.0001
	467	KUtE_C_2018	pLARmEB	Kukri_c107638_253	7A	32028594	-0.0003	9.0876	10.006	0.0159	0.0506	CC	0	0.0001
	468	CHL_H_C_2017	pLARmEB	Excalibur_c14189_134	7A	47444419	-1.0941	5.8337	6.661	12.0965	0.2079	AA	5.7708	6.7807
	469	KUE_T_2017	pLARmEB	BobWhite_c8076_300	7A	68889457	-0.0002	13.5473	14.5566	0.0224	0.073	TT	0	0
	470	KUtE_T_2017	pLARmEB	BobWhite_c8076_300	7A	68889457	-0.0003	5.9062	6.736	0.0367	0.073	TT	0	0.0001
	471	KUtE_T_2017	pLARmEB	GENE-4375_382	7A	79780963	-0.0005	7.635	8.5174	0.2431	0.2753	GG	0	0.0001
	472	FW_T_H	FASTmrMLM	wsnp_Ex_c13337_21022658	7A	81133978	-0.002	6.5049	7.3544	0.9405	0.1854	CC	0.0001	0.0003
	473	KUtE_C_2018	pLARmEB	IACX9283	7A	85414746	0.0023	11.8132	12.7864	3.8057	0.309	CC	0	0.0001
	474	SW_T_H	FASTmrMLM	JD_c19177_1462	7A	87307571	0.0007	6.0138	6.8473	0.0193	0.118	AA	0.0003	0.001
	475	GY_C_2016	pLARmEB	RAC875_c16287_726	7A	610208889	-0.4161	6.3247	7.1685	12.1787	0.4863	AG	0.4718	1.1659
	476	HI_T_2016	pLARmEB	Kukri_c53682_85	7A	644619198	-4.2882	7.9731	8.8644	11.1291	0.3151	AA	50.1635	142.625
	477	KUE_T_2018	FASTmrMLM	BS00066295_51	7A	657375487	-0.0001	6.0333	6.8675	0.0023	0.0169	AA	0	0.0001
	478	KUE_C_2017	pLARmEB	BS00009838_51	7A	666607524	-0.0001	6.5296	7.3799	0.0063	0.0281	TT	0	0
	479	KUE_C_2017	FASTmrMLM	BS00009838_51	7A	666607524	-0.0002	14.0126	15.0003	0.0157	0.0281	TT	0	0
	480	KUtE_C_2017	pLARmEB	wsnp_JD_c149_238783	7A	670769304	-0.0006	10.872	11.8277	0.0596	0.1742	TG	0	0.0001
	481	KUE_T_2017	pLARmEB	wsnp_Ex_c11047_17915225	7A	670769585	-0.0004	7.9989	8.8909	0.1743	0.4382	TC	0	0
	482	KUE_C_2017	FASTmrMLM	RAC875_c1115_341	7A	670780611	-0.0002	5.3602	6.1704	0.0275	0.2528	AG	0	0
	483	SpS_T_2017	mrMLM	wsnp_Ku_rep_c104159_90704469	7A	674279479	1.1598	8.7354	9.64559	37.2923	0.3276	T	0.9289	2.3605
	484	KUE_T_2018	pLARmEB	Excalibur_c14451_1137	7A	675268377	-0.0006	11.3421	12.3066	0.1204	0.0393	GG	0	0.0001
	485	KUtE_T_2018	pLARmEB	BS00022169_51	7A	691259651	-0.0002	11.0915	12.0514	0.0086	0.0618	GG	0	0.0001
	486	KUE_T_2018	pLARmEB	wsnp_Ra_c35321_43882919	7A	692880472	-0.0005	6.2341	7.0749	0.3467	0.3146	GG	0	0.0001
	487	KUpE_C_2018	pLARmEB	wsnp_Ra_c35321_43882919	7A	692880472	-0.0604	5.696	6.5185	9.9784	0.3146	GG	0.0252	0.0327
	488	KUtE_C_2017	pLARmEB	BS00061940_51	7A	700274575	0.0023	6.1051	6.9417	3.5216	0.2191	CC	0	0.0001
	489	KUtE_T_2017	FASTmrMLM	RAC875_rep_c110061_183	7A	700301431	4.2251e-05	7.5704	8.451	0.0003	0.0169	TT	0	0.0001
	490	KUE_C_2018	FASTmrMLM	Ex_c29172_877	7A	708363089	0.0009	8.1186	9.0136	1.8217	0.427	CC	0	0
	491	KUE_T_2018	pLARmEB	Excalibur_rep_c73544_223	7A	709406943	-0.0002	10.5363	11.4855	0.0119	0.073	GG	0	0.0001
	492	KUtE_T_2017	pLARmEB	Kukri_rep_c70199_638	7A	709407115	0.0001	14.2539	15.2556	0.005	0.0393	CC	0	0.0001
	493	KUE_C_2017	FASTmrMLM	RAC875_c1606_644	7A	709885312	0.0004	10.5064	11.455	0.4589	0.3034	GG	0	0
	494	SpS_T_2017	FASTmrMLM	Ku_c19745_892	7A	712058659	-0.4833	6.3865	7.2323	7.795	0.236	TT	0.8788	2.3605
	495	RL_C_2018	FASTmrMLM	wsnp_Ex_c5839_10246812	7A	717036867	3.976	6.6534	7.5075	7.0855	0.1629	CC	29.9338	86.267
	496	RL_C_2018	mrMLM	wsnp_Ra_c7112_12318340	7A	717040885	6.2411	9.1056	10.0244	19.8488	0.1782	C	36.3012	86.267
	497	KUE_C_2017	FASTmrMLM	BS00022137_51	7A	729397548	0.0003	9.9935	10.9316	0.0616	0.0506	AA	0	0
	498	KUE_T_2017	pLARmEB	Kukri_c60729_430	7B	12953101	8.1533e-05	8.9084	9.8227	0.0036	0.0449	CC	0	0
	499	FW_T_H	pLARmEB	wsnp_Ku_rep_c102842_89723861	7B	43880843	0.0001	5.8439	6.6716	0.0047	0.3708	TT	0.0001	0.0003
	500	KUtE_T_2017	pLARmEB	BS00031746_51	7B	43882125	-0.0005	14.0769	15.1095	0.349	0.4101	GG	0	0.0001
	501	KUE_T_2017	pLARmEB	BS00064344_51	7B	44878553	-0.0007	6.7673	7.6249	1.1887	0.3315	GG	0	0
	502	SW_C_H	pLARmEB	GENE-4862_901	7B	59647565	-0.0155	5.8436	6.6713	2.9651	0.0787	GG	0.0004	0.0007
	503	KUE_T_2017	pLARmEB	RAC875_c53629_760	7B	107100604	-0.0003	10.1089	11.0494	0.0494	0.0674	CC	0	0
	504	KUE_C_2017	pLARmEB	BobWhite_c10017_644	7B	136312143	-0.0001	6.8722	7.7329	0.0269	0.1629	GG	0	0
	505	TN_T_2017	mrMLM	Ku_c9598_2119	7B	159141848	-0.1082	5.1318	5.93317	11.0359	0.4483	A	0.0302	0.0817
	506	TN_T_2017	FASTmrMLM	Ku_c9598_2119	7B	159141848	-0.0898	5.1714	5.9743	8.6521	0.4382	AA	0.037	0.0817
	507	KUE_C_2017	FASTmrMLM	Ra_c19501_1510	7B	505294696	0.0003	7.7127	8.5972	0.0656	0.0674	TT	0	0
	508	KUE_T_2018	FASTmrMLM	BS00076675_51	7B	653289313	-0.0006	11.2122	12.1743	0.6228	0.4944	TT	0	0.0001
	509	KUtE_T_2018	pLARmEB	Excalibur_c91560_445	7B	658220471	-8.8627e-05	6.2651	7.1069	0.0005	0.0169	GG	0	0.0001
	510	KUtE_T_2017	pLARmEB	Kukri_c55731_81	7B	700403758	0.0005	6.391	7.2369	0.1787	0.1517	GG	0	0.0001
	511	KUE_C_2017	FASTmrMLM	BS00063641_51	7B	702528984	0.0003	5.9458	6.777	0.0935	0.1011	GG	0	0
	512	KUtE_C_2017	pLARmEB	Tdurum_contig42586_720	7B	718850865	0.0032	7.8658	8.7543	1.1818	0.4888	TC	0	0.0001
	513	KUE_C_2018	FASTmrMLM	RAC875_c31851_529	7B	732399766	0.0002	5.0068	5.8032	0.0212	0.0618	CC	0	0
	514	KUtE_C_2017	pLARmEB	Ku_c35807_609	7B	745230917	0.0013	9.7904	10.7243	1.0743	0.3371	CC	0	0.0001
	515	FW_T_H	pLARmEB	BS00097529_51	7B	750604062	-0.0002	5.1333	5.9347	0.0007	0.0169	GG	0.0001	0.0003
	516	KUE_C_2018	FASTmrMLM	Kukri_c37227_579	7D	5049477	-0.0004	13.0452	14.0408	0.0807	0.0281	AA	0	0
	517	KUE_T_2018	FASTmrMLM	Kukri_c37227_579	7D	5049477	-0.0005	7.8258	8.7133	0.0671	0.0281	AA	0	0.0001
	518	KUtE_T_2018	pLARmEB	BS00008445_51	7D	5180083	-0.0005	12.9391	13.9293	0.1089	0.236	TT	0	0.0001
	519	KUE_T_2017	pLARmEB	IAAV6615	7D	22612166	5.4211e-05	15.0632	15.9546	0.0013	0.0225	AA	0	0
	520	KUE_C_2018	FASTmrMLM	GENE-4346_109	7D	71318625	-0.0004	8.6639	9.5724	0.0786	0.0449	AA	0	0
	521	GY_C_2016	pLARmEB	Kukri_c100613_331	7D	112431129	0.45	8.1334	9.0288	16.7557	0.4658	CC	0.4718	1.1659
	522	KUtE_T_2018	pLARmEB	CAP7_c9278_185	7D	146106813	-0.0004	5.5462	6.3633	0.0213	0.0393	AA	0	0.0001
	523	KUtE_T_2018	FASTmrMLM	CAP7_c9278_185	7D	146106813	-0.0003	7.4625	8.3402	0.0081	0.0393	AA	0.0001	0.0001
	524	KUtE_T_2018	FASTmrMLM	wsnp_Ex_c17346_26030825	7D	370181380	0.0003	12.5457	13.5313	0.0598	0.1966	CC	0.0001	0.0001
	525	SW_T_H	FASTmrMLM	Kukri_c58234_519	7D	413246857	-0.002	9.2771	10.1998	0.3234	0.236	CC	0.0003	0.001
	526	SW_T_H	FASTmrMLM	Ex_c8238_637	7D	461205902	-0.0009	8.6955	9.6047	0.0713	0.382	TT	0.0003	0.001
	527	DM_T_2018	mrMLM	Tdurum_contig5360_95	7D	600451347	1.9695	5.5066	6.32221	14.8848	0.3391	G	12.533	18.4308
	528	KUE_C_2018	FASTmrMLM	BobWhite_c4240_78	7D	634694320	-0.0012	11.3092	12.2732	0.6131	0.4831	AG	0	0
	*Trait nomenclature is presented in Table 2 legends.
