# Supplementary material for: Genome-Wide Association Study and QTL Meta-Analysis Identified Novel Genomic Loci Controlling Potassium Use Efficiency and Agronomic Traits in Bread Wheat
Source: Front Plant Sci. 2020 Feb 18;11:70. doi: 10.3389/fpls.2020.00070 (PMC7041172; doi:10.3389/fpls.2020.00070)
Supplement: Supplementary file 7 [file Table_7.xlsx]

## Sheet: Table S7
	Table S7. MTA from SL-GWAS and ML-GWAS combined to identify significant SNPs.
	Sno	Trait*	Method	SNP Namea	Chromosome	Marker Position (bp)	Marker Position (Mb)	LOD score	-log10p	r2 (%)	MAF
	1	FW_T_H	FASTmrMLM	wsnp_RFL_Contig4735_5673999	1A	7658364	7.65836	8.251	9.1494	0.0032	0.4888
	2	DM_C_2018	MLM	Tdurum_contig42479_3110	1A	12506082	12.5061		5.76591	0.35351
	3	FW_T_H	FASTmrMLM	Excalibur_c25050_372	1A	27260788	27.2608	8.9171	9.8316	0.0262	0.3258
	4	KUE_T_2018	pLARmEB	Excalibur_c47654_70	1A	49097391	49.0974	11.938	12.9132	0.3639	0.264
	5	KUE_T_2018	pLARmEB	RAC875_c10659_1539	1A	57764926	57.7649	6.5208	7.3708	0.0314	0.0674
	6	CHL_B_C_2017	pLARmEB	wsnp_Ku_rep_c107796_93118214	1A	73313141	73.3131	6.0842	6.9201	9.0177	0.0899
	7	KUtE_C_2017	pLARmEB	wsnp_Ex_c44049_50205904	1A	337678122	337.678	9.3357	10.2597	1.1276	0.1573
	8	NA_C_H	pLARmEB	RAC875_c41113_144	1A	343410529	343.411	5.1412	5.9429	12.9992	0.1685
	9	Na+_C_H	pLARmEB	RAC875_c41113_144	1A	343410529	343.411	5.1412	5.9429	12.9992	0.1685
	10	SpL_C_2018	pLARmEB	Ex_c5192_943	1A	485002381	485.002	5.9427	6.7738	4.8699	0.1629
	11	FW_T_H	FASTmrMLM	Ex_c5192_943	1A	485002381	485.002	11.6745	12.6452	0.1878	0.1629
	12	KUtE_C_2017	pLARmEB	wsnp_Ku_c21316_31053745	1A	498141636	498.142	9.1152	10.0342	0.1833	0.2809
	13	KUtE_C_2017	pLARmEB	wsnp_Ku_c1642_3232242	1A	507079382	507.079	14.3228	15.3525	0.7915	0.3652
	14	KUE_C_2017	FASTmrMLM	Kukri_c31891_1355	1A	508640934	508.641	14.2884	15.3525	0.8896	0.3933
	15	KUE_C_2017	FASTmrMLM	Kukri_rep_c109473_80	1A	514138353	514.138	8.0027	8.8948	0.8479	0.4213
	16	GY_C_2017	FASTmrMLM	Excalibur_c29605_535	1A	520579915	520.58	7.5706	8.4512	19.0841	0.4607
	17	KUE_C_2017	FASTmrMLM	Excalibur_c29605_535	1A	520579915	520.58	6.4286	7.2757	1.7869	0.4607
	18	SpS_C_2018	FASTmrMLM	BobWhite_c23632_322	1A	539762835	539.763	6.0962	6.9325	13.2578	0.2584
	19	SpS_C_2018	pLARmEB	BobWhite_c23632_322	1A	539762835	539.763	8.0827	8.9768	20.5043	0.2584
	20	KUE_C_2017	pLARmEB	BS00095510_51	1A	543961391	543.961	9.7311	10.6637	0.6463	0.2753
	21	KUtE_T_2017	pLARmEB	BS00078085_51	1A	544055625	544.056	7.9388	8.8292	0.3487	0.2809
	22	KUE_C_2018	FASTmrMLM	wsnp_BE494527A_Ta_2_1	1A	547299571	547.3	15.084	15.9546	0.5681	0.2978
	23	BY_T_2017	MLM	JD_c285_1438	1A	551484556	551.485		5.02658	0.30184
	24	FW_T_H	pLARmEB	tplb0021i12_383	1A	568025559	568.026	5.7948	6.6208	0.0164	0.2247
	25	KUE_C_2018	FASTmrMLM	RAC875_c23586_541	1A	568417022	568.417	7.3457	8.2201	1.1103	0.1573
	26	BY_C_2016	pLARmEB	Excalibur_c17320_833	1A	575228804	575.229	6.1449	6.9828	10.8323	0.3288
	27	KUE_C_2017	FASTmrMLM	wsnp_Ex_c48407_53323483	1A	579864880	579.865	7.5846	8.4656	0.0871	0.1742
	28	KUtE_C_2017	pLARmEB	RAC875_c52947_338	1A	580496484	580.496	14.5166	15.4775	0.1787	0.0843
	29	KUtE_C_2017	pLARmEB	wsnp_Ra_c6891_11974621	1A	581585520	581.586	10.3421	11.2874	0.2098	0.1461
	30	KUE_C_2017	FASTmrMLM	wsnp_Ra_c6891_11974621	1A	581585520	581.586	10.7226	11.6754	0.1766	0.1461
	31	FW_C_H	FASTmrMLM	RAC875_c62550_470	1A	583894934	583.895	5.1509	5.953	0.602	0.2865
	32	PH_T_2018	FASTmrMLM	IAAV1301	1A	589874399	589.874	5.7162	6.5394	10.6595	0.3989
	33	KUE_C_2018	pLARmEB	Kukri_c43479_207	1A	590343100	590.343	11.5904	12.5594	0.4757	0.264
	34	TN_T_2017	mrMLM	Tdurum_contig47006_1105	1A	593549077	593.549	5.7176	6.54083	29.4676	0.1724
	35	TN_T_2017	FASTmrMLM	Tdurum_contig47006_1105	1A	593549077	593.549	5.0673	5.8661	26.022	0.1685
	36	KUE_C_2017	FASTmrMLM	RAC875_c48669_292	1B	1524033	1.52403	8.9646	9.8802	0.1561	0.0843
	37	KUE_T_2017	pLARmEB	GENE-1118_1049	1B	8222519	8.22252	11.9943	12.9705	0.0073	0.0506
	38	KUtE_T_2017	FASTmrMLM	BS00022319_51	1B	57430658	57.4307	9.9494	10.8866	0.0393	0.4663
	39	KUtE_T_2017	pLARmEB	BS00022319_51	1B	57430658	57.4307	12.0351	13.0121	0.1477	0.4663
	40	KUtE_T_2017	FASTmrMLM	BS00066014_51	1B	59514595	59.5146	9.0076	9.9241	0.4722	0.4382
	41	KUtE_T_2017	pLARmEB	BS00066014_51	1B	59514595	59.5146	8.8236	9.7359	1.5766	0.4382
	42	KUtE_T_2018	pLARmEB	Excalibur_c6952_263	1B	69823889	69.8239	13.1376	14.135	0.0494	0.0506
	43	KUE_T_2018	pLARmEB	Excalibur_c6952_263	1B	69823889	69.8239	10.4417	11.389	0.0791	0.0506
	44	KUE_T_2018	FASTmrMLM	Ra_c69176_1308	1B	107136692	107.137	5.4116	6.2237	0.1409	0.0787
	45	FW_C_H	FASTmrMLM	Excalibur_c32472_263	1B	108218026	108.218	13.6626	14.6758	0.0039	0.0112
	46	KUE_C_2017	FASTmrMLM	wsnp_Ku_c9144_15396815	1B	119099248	119.099	11.1886	12.1503	0.0001	0.0056
	47	BY_T_2017	mrMLM	Kukri_c19641_477	1B	275672539	275.673	10.2861	11.2302	49.4641	0.4943
	48	K_T_2017	mrMLM	Kukri_c19641_477	1B	275672539	275.673	8.603	9.51003	59.4116	0.4943
	49	KUpE_T_2017	mrMLM	Kukri_c19641_477	1B	275672539	275.673	8.603	9.51003	59.4116	0.4943
	50	KUtE_T_2018	FASTmrMLM	wsnp_Ex_c17238_25895129	1B	300950124	300.95	13.7462	14.7505	0.0008	0.0169
	51	FW_T_H	FASTmrMLM	Ra_c11303_359	1B	379383435	379.383	5.1781	5.9813	0.0007	0.0112
	52	SW_T_H	FASTmrMLM	IACX11291	1B	530959722	530.96	8.9565	9.8719	0.0332	0.3427
	53	HI_C_2017	FASTmrMLM	wsnp_Ku_c34980_44256215	1B	545644564	545.645	7.6389	8.5214	0.3891	0.118
	54	KUE_T_2018	pLARmEB	wsnp_JD_c6331_7499060	1B	548967983	548.968	11.9074	12.882	0.0109	0.0787
	55	CHL_B_C_2017	mrMLM	wsnp_Ex_c5098_9047611	1B	548971423	548.971	6.0142	6.84771	20.4768	0.1149
	56	KUtE_T_2018	pLARmEB	Excalibur_c16203_451	1B	555298082	555.298	6.3853	7.231	0.3424	0.118
	57	BY_C_2016	pLARmEB	IACX11274	1B	576024228	576.024	7.2996	8.1727	12.0131	0.2123
	58	LA_C_2016	mrMLM	BS00034012_51	1B	583983571	583.984	5.8942	6.72361	25.7277	0.0643
	59	LA_T_2016	mrMLM	BS00034012_51	1B	583983571	583.984	6.1218	6.95892	27.185	0.0643
	60	FW_T_H	FASTmrMLM	Excalibur_c581_1220	1B	624506208	624.506	7.5857	8.4667	0.0518	0.3708
	61	FW_T_H	FASTmrMLM	Tdurum_contig67656_387	1B	626085427	626.085	13.0425	14.0355	0.6522	0.3483
	62	FW_T_H	FASTmrMLM	BobWhite_c9881_1312	1B	626713811	626.714	10.3162	11.261	0.0051	0.1517
	63	FW_C_H	FASTmrMLM	RAC875_c839_352	1B	632421148	632.421	5.532	6.3485	1.8301	0.3933
	64	SpL_C_2017	pLARmEB	tplb0043a07_880	1B	637622677	637.623	6.3611	7.206	12.7622	0.427
	65	SpS_T_2017	FASTmrMLM	tplb0043a07_880	1B	637622677	637.623	5.0117	5.8083	7.0159	0.427
	66	KUtE_C_2018	pLARmEB	BobWhite_c19733_301	1B	641552767	641.553	10.1841	11.1262	0.5933	0.3315
	67	FW_T_H	pLARmEB	RAC875_c3057_2297	1B	658495308	658.495	10.6509	11.6023	0.0293	0.2079
	68	KUE_C_2018	FASTmrMLM	Tdurum_contig29087_628	1B	661633325	661.633	11.5226	12.4904	0.0169	0.1067
	69	KUtE_T_2017	FASTmrMLM	CAP7_rep_c6352_375	1B	668912357	668.912	6.5664	7.4178	0.0195	0.0225
	70	KUtE_T_2017	pLARmEB	CAP7_rep_c6352_375	1B	668912357	668.912	14.7235	15.6536	0.0043	0.0225
	71	KUE_C_2017	FASTmrMLM	BS00063418_51	1D	513174	0.513174	14.2358	15.2556	0.2704	0.0955
	72	KUE_C_2017	pLARmEB	BS00063418_51	1D	513174	0.513174	10.5132	11.4619	0.1465	0.0955
	73	KUE_T_2017	pLARmEB	wsnp_CAP12_c55_32598	1D	2103061	2.10306	13.098	14.0913	0.0004	0.0225
	74	KUE_C_2018	FASTmrMLM	BS00047515_51	1D	2588483	2.58848	13.2485	14.247	0.0253	0.1573
	75	KUtE_C_2018	pLARmEB	RAC875_rep_c105796_617	1D	7876699	7.8767	6.0728	6.9083	0.3436	0.2697
	76	KUtE_T_2018	pLARmEB	RAC875_c10387_685	1D	11399886	11.3999	14.6652	15.6536	0.5409	0.3652
	77	KUE_T_2017	pLARmEB	BS00011205_51	1D	52345479	52.3455	5.734	6.5578	0.6387	0.4551
	78	KUtE_C_2017	FASTmrMLM	Kukri_c32885_145	1D	261741663	261.742	7.1411	8.0097	0.3856	0.1629
	79	HI_C_2017	FASTmrMLM	Kukri_c13458_226	1D	336365267	336.365	7.0105	7.8753	0.0002	0.0562
	80	RL_C_H	pLARmEB	Kukri_c13458_226	1D	336365267	336.365	6.588	7.4401	5.7501	0.0562
	81	FW_T_H	FASTmrMLM	Kukri_c13458_226	1D	336365267	336.365	10.9266	11.8834	0.044	0.0562
	82	FW_T_H	pLARmEB	Kukri_c13458_226	1D	336365267	336.365	6.544	7.3947	0.002	0.0562
	83	FW_T_H	FASTmrMLM	IAAV4656	1D	357459758	357.46	9.598	10.5277	0.1259	0.309
	84	FW_T_H	pLARmEB	IAAV4656	1D	357459758	357.46	12.8293	13.8211	0.0281	0.309
	85	KUE_T_2018	pLARmEB	BobWhite_c39092_629	1D	470894146	470.894	10.2918	11.2361	0.0888	0.2191
	86	KUE_C_2018	pLARmEB	BS00063512_51	1D	485708741	485.709	6.3312	7.1752	0.0192	0.073
	87	KUE_T_2018	pLARmEB	RFL_Contig2961_1806	1D	493485518	493.486	10.3096	11.2542	0.1715	0.3933
	88	NA_C_H	mrMLM	BS00018347_51	2A	12469121	12.4691	5.5672	6.38503	19.787	0.0172
	89	Na+_C_H	mrMLM	BS00018347_51	2A	12469121	12.4691	5.5672	6.38503	19.787	0.0172
	90	KUE_T_2017	pLARmEB	GENE-1086_1111	2A	12961300	12.9613	13.5332	14.5396	0.0231	0.0674
	91	KUE_T_2018	FASTmrMLM	IACX10973	2A	13409094	13.4091	12.864	13.8542	0.0216	0.0225
	92	FW_T_H	FASTmrMLM	BS00065110_51	2A	31088889	31.0889	11.2545	12.2174	0.1314	0.0506
	93	RW_T_H	mrMLM	Tdurum_contig560_239	2A	72382644	72.3826	8.4722	9.37605	38.4622	0.3563
	94	NA_T_H	pLARmEB	Tdurum_contig560_239	2A	72382644	72.3826	5.5461	6.3632	26.0669	0.3539
	95	CHL_21DAG_T_H	mrMLM	Ra_c22724_810	2A	182301716	182.302	6.7615	7.61892	54.1225	0.3678
	96	PH_T_2016	pLARmEB	Kukri_c57491_132	2A	502335158	502.335	7.9118	8.8015	22.3701	0.1575
	97	BY_T_2016	FASTmrMLM	Excalibur_c1793_97	2A	558953000	558.953	6.1168	6.9538	18.1799	0.2466
	98	HI_T_2016	pLARmEB	wsnp_CAP11_rep_c8469_3658252	2A	570002495	570.002	6.6507	7.5047	10.5043	0.1575
	99	FW_T_H	FASTmrMLM	BS00026377_51	2A	576657262	576.657	5.1793	5.9825	0.0049	0.0281
	100	KUE_T_2018	pLARmEB	IAAV80	2A	603687063	603.687	11.3596	12.3245	0.0709	0.1292
	101	KUtE_C_2018	pLARmEB	BS00062679_51	2A	615287757	615.288	9.4924	10.4198	0.0101	0.0506
	102	SL_T_H	mrMLM	Excalibur_c74376_158	2A	631640920	631.641	7.5488	8.42884	33.0074	0.0517
	103	SL_T_H	pLARmEB	Excalibur_c74376_158	2A	631640920	631.641	5.1791	5.9823	14.5727	0.0506
	104	KUtE_T_2017	FASTmrMLM	Ra_c26702_797	2A	701482423	701.482	6.2571	7.0987	0.0004	0.0056
	105	Na+_T_2018	pLARmEB	Excalibur_c65910_246	2A	712308171	712.308	5.561	6.3786	41.6631	0.4888
	106	FW_T_H	FASTmrMLM	Excalibur_c25380_113	2A	713197623	713.198	6.1418	6.9796	0.0539	0.0337
	107	KUE_C_2017	FASTmrMLM	wsnp_Ra_c3378_6318431	2A	723525913	723.526	5.5178	6.3338	0.0291	0.2022
	108	KUE_C_2017	FASTmrMLM	BS00057060_51	2A	729288358	729.288	8.1924	9.0893	0.4007	0.4494
	109	RL_C_2018	pLARmEB	Tdurum_contig10574_864	2A	732585393	732.585	8.5275	9.4327	4.7794	0.1067
	110	RL_C_2018	mrMLM	wsnp_Ex_c5740_10081171	2A	740848305	740.848	6.4758	7.32439	12.3199	0.3621
	111	KUE_T_2018	pLARmEB	BS00010098_51	2A	743096823	743.097	8.8859	9.7996	0.2499	0.1629
	112	FW_T_H	FASTmrMLM	BS00023144_51	2A	744329367	744.329	8.5156	9.4205	0.0999	0.2921
	113	FW_T_H	pLARmEB	BS00023144_51	2A	744329367	744.329	8.9033	9.8174	0.0141	0.2921
	114	SW_T_H	FASTmrMLM	Tdurum_contig56321_232	2A	758514679	758.515	6.7909	7.6492	0.0145	0.3146
	115	KUE_T_2018	FASTmrMLM	Tdurum_contig52350_636	2A	759830158	759.83	5.0893	5.889	0.3672	0.4831
	116	KUE_T_2018	pLARmEB	Tdurum_contig52350_636	2A	759830158	759.83	5.9596	6.7913	0.9452	0.4831
	117	KUpE_C_2017	pLARmEB	Ex_c6937_1992	2A	761540385	761.54	5.5504	6.3676	0.7734	0.2191
	118	TN_T_2017	mrMLM	BobWhite_c11479_157	2A	764657398	764.657	7.1016	7.96908	12.4786	0.3908
	119	TN_T_2017	FASTmrMLM	BobWhite_c11479_157	2A	764657398	764.657	7.867	8.7555	10.2872	0.3989
	120	TN_T_2017	pLARmEB	BobWhite_c11479_157	2A	764657398	764.657	10.7292	11.6821	7.3071	0.3989
	121	BY_T_2017	FASTmrMLM	BobWhite_c11479_157	2A	764657398	764.657	5.7047	6.5275	5.4649	0.3989
	122	BY_T_2017	pLARmEB	BobWhite_c11479_157	2A	764657398	764.657	5.0112	5.8078	4.0491	0.3989
	123	KUE_T_2017	pLARmEB	BobWhite_c11479_157	2A	764657398	764.657	9.52	10.448	2.0228	0.3989
	124	FW_C_H	FASTmrMLM	RAC875_rep_c69411_672	2A	766396323	766.396	6.4092	7.2557	0.0045	0.0281
	125	KUE_T_2017	pLARmEB	Tdurum_contig45196_487	2A	770411323	770.411	7.6835	8.5672	0.8085	0.4101
	126	DM_C_2018	MLM	GENE-0762_185	2A	770412714	770.413		5.43319	0.34931
	127	KUtE_T_2017	pLARmEB	Ex_c72358_240	2A	773710553	773.711	6.5154	7.3652	0.002	0.0169
	128	RL_C_2018	FASTmrMLM	BS00107857_51	2A	774855770	774.856	5.0317	5.8291	6.9667	0.3315
	129	RL_C_2018	pLARmEB	BS00107857_51	2A	774855770	774.856	5.0606	5.8592	4.0421	0.3315
	130	KUE_T_2018	pLARmEB	BS00044332_51	2B	2109772	2.10977	11.6191	12.5887	0.1078	0.4326
	131	FW_T_H	pLARmEB	wsnp_Ra_c1501_2991585	2B	6338084	6.33808	7.5875	8.4686	0.0436	0.4438
	132	HI_C_2017	FASTmrMLM	Excalibur_c42248_663	2B	6715690	6.71569	6.2904	7.1331	6.351e-05	0.4831
	133	KUE_T_2017	pLARmEB	BS00065927_51	2B	8344509	8.34451	5.2163	6.021	0.1171	0.1742
	134	KUE_C_2017	pLARmEB	Excalibur_c1787_1037	2B	16827640	16.8276	7.3134	8.1869	0.3228	0.4831
	135	SW_T_H	FASTmrMLM	BS00109330_51	2B	24264552	24.2646	6.5809	7.4328	0.2801	0.3483
	136	KUE_T_2017	pLARmEB	Kukri_rep_c103530_251	2B	27088810	27.0888	13.473	14.4775	0.114	0.1573
	137	RL_T_H	FASTmrMLM	GENE-0592_268	2B	35284538	35.2845	6.017	6.8506	25.2548	0.4831
	138	RL_T_H	pLARmEB	GENE-0592_268	2B	35284538	35.2845	7.8078	8.6948	31.3196	0.4831
	139	RW_T_H	pLARmEB	GENE-0592_268	2B	35284538	35.2845	9.3304	10.2543	27.9302	0.4831
	140	NA_T_H	mrMLM	GENE-0592_268	2B	35284538	35.2845	5.2352	6.04059	26.1974	0.4828
	141	NA_T_H	FASTmrMLM	GENE-0592_268	2B	35284538	35.2845	5.2352	6.0406	22.1182	0.4831
	142	CHL_21DAG_T_H	FASTmrMLM	GENE-0592_127	2B	35284667	35.2847	6.279	7.1213	27.4275	0.4888
	143	CHL_21DAG_T_H	pLARmEB	GENE-0592_127	2B	35284667	35.2847	6.5561	7.4072	30.4155	0.4888
	144	Chl_C_2018	mrMLM	BS00093755_51	2B	44424386	44.4244	7.2267	8.09777	10.9731	0.431
	145	Chl_C_2018	FASTmrMLM	Tdurum_contig11379_1047	2B	46090653	46.0907	5.6739	6.4956	11.5571	0.4551
	146	KUtE_C_2017	pLARmEB	Kukri_rep_c107572_121	2B	68365389	68.3654	5.1261	5.9272	0.0849	0.1124
	147	KUE_T_2018	pLARmEB	Tdurum_contig94176_65	2B	71292465	71.2925	12.3145	13.2966	1.6183	0.4831
	148	FW_T_H	pLARmEB	BS00071690_51	2B	105375830	105.376	5.9373	6.7682	0.2908	0.1461
	149	KUE_T_2017	pLARmEB	Excalibur_c23723_141	2B	161409209	161.409	12.1433	13.1221	0.0576	0.0787
	150	KUE_T_2017	pLARmEB	BobWhite_c948_52	2B	180616389	180.616	6.8388	7.6985	0.4974	0.4607
	151	SpL_C_2018	FASTmrMLM	BobWhite_c948_52	2B	180616389	180.616	5.011	5.8076	9.6919	0.4607
	152	SpL_C_2018	pLARmEB	BobWhite_c948_52	2B	180616389	180.616	5.2065	6.0108	3.8452	0.4607
	153	KUtE_C_2017	pLARmEB	wsnp_Ku_c2562_4879681	2B	190225573	190.226	14.1701	15.1764	0.7146	0.4888
	154	KUE_C_2017	FASTmrMLM	wsnp_Ku_c2562_4879681	2B	190225573	190.226	12.5872	13.5744	0.9159	0.4888
	155	KUE_C_2017	pLARmEB	wsnp_Ku_c2562_4879681	2B	190225573	190.226	9.685	10.6166	0.0351	0.4888
	156	SW_C_H	FASTmrMLM	wsnp_Ra_c2842_5399988	2B	202917263	202.917	5.1509	5.953	0.0023	0.0337
	157	KUE_C_2017	FASTmrMLM	Kukri_c32980_680	2B	202917573	202.918	13.0384	14.0303	0.11	0.264
	158	KUtE_T_2018	FASTmrMLM	BS00078506_51	2B	210842836	210.843	7.0395	7.9052	0.0002	0.0169
	159	KUE_C_2017	pLARmEB	Excalibur_c12278_1301	2B	246068638	246.069	14.93	15.9546	1.28	0.4719
	160	KUE_C_2017	FASTmrMLM	Ex_c7628_2392	2B	412665461	412.665	11.3216	12.2857	0.2383	0.1461
	161	KUE_T_2017	pLARmEB	BS00066545_51	2B	452811270	452.811	6.3656	7.2107	0.0936	0.236
	162	SW_T_H	FASTmrMLM	Ra_c21042_617	2B	456025580	456.026	14.5616	15.6536	0.0009	0.1461
	163	SW_T_H	FASTmrMLM	BobWhite_c7326_70	2B	456172645	456.173	13.8992	14.9132	0.0197	0.1404
	164	KUtE_C_2017	pLARmEB	Excalibur_c99477_90	2B	456176969	456.177	6.5944	7.4467	0.0115	0.118
	165	KUE_C_2017	FASTmrMLM	Excalibur_c99477_90	2B	456176969	456.177	5.641	6.4615	0.0003	0.118
	166	HI_C_2017	FASTmrMLM	BobWhite_c40428_349	2B	462936127	462.936	5.0552	5.8535	0.0004	0.2697
	167	KUE_C_2017	FASTmrMLM	BS00064698_51	2B	467489872	467.49	11.4858	12.453	0.2067	0.0899
	168	KUtE_T_2018	FASTmrMLM	Tdurum_contig61682_187	2B	476407676	476.408	9.4536	10.3802	0.0295	0.1124
	169	KUE_C_2018	FASTmrMLM	wsnp_Ex_c10838_17631243	2B	598971364	598.971	5.4738	6.2882	0.007	0.0337
	170	KUtE_T_2017	FASTmrMLM	Ex_c2510_477	2B	612066212	612.066	5.0409	5.8387	0.038	0.073
	171	KUtE_T_2017	FASTmrMLM	Tdurum_contig31911_195	2B	646417390	646.417	5.3904	6.2017	0.0355	0.0674
	172	SW_T_H	FASTmrMLM	Tdurum_contig96648_102	2B	694055722	694.056	5.7151	6.5382	2.9878	0.3989
	173	SpS_C_2017	mrMLM	BS00046164_51	2B	697510323	697.51	5.5186	6.33465	28.0827	0.3621
	174	SpS_C_2017	FASTmrEMMA	BS00046164_51	2B	697510323	697.51	5.3998	6.2115	17.6234	0.3539
	175	SpS_T_2017	FASTmrMLM	BS00046164_51	2B	697510323	697.51	5.736	6.5599	11.1753	0.3539
	176	SpS_T_2017	pLARmEB	BS00046164_51	2B	697510323	697.51	6.4351	7.2824	15.215	0.3539
	177	KUtE_T_2017	pLARmEB	BS00046165_51	2B	697510334	697.51	10.6009	11.5513	0.1923	0.3483
	178	SpL_C_2018	pLARmEB	BobWhite_c2521_117	2B	699106259	699.106	7.0398	7.9055	11.5237	0.3764
	179	DM_T_2018	FASTmrMLM	Tdurum_contig29246_118	2B	700741357	700.741	6.5778	7.4296	30.4727	0.4551
	180	DM_T_2018	pLARmEB	Tdurum_contig29246_118	2B	700741357	700.741	8.0427	8.9358	16.3919	0.4551
	181	KUE_T_2018	pLARmEB	Excalibur_c60964_203	2B	708436706	708.437	13.7693	14.7785	0.0132	0.0281
	182	KUtE_C_2018	pLARmEB	Tdurum_contig12660_192	2B	719803663	719.804	13.9288	14.9546	0.0776	0.4607
	183	FW_C_H	FASTmrMLM	BobWhite_c26329_71	2B	725961243	725.961	6.0673	6.9026	0.0074	0.0337
	184	KUtE_C_2017	pLARmEB	RAC875_c26697_589	2B	743736791	743.737	6.8145	7.6735	0.0058	0.2865
	185	HI_C_2017	FASTmrMLM	RAC875_c98387_130	2B	766233839	766.234	14.9981	15.9546	5.7327e-05	0.2697
	186	SpL_T_2018	pLARmEB	BS00064836_51	2B	774831016	774.831	7.2374	8.1088	6.4777	0.3989
	187	KUtE_C_2017	pLARmEB	Ex_c5327_1731	2B	776977952	776.978	6.4747	7.3233	0.0095	0.0393
	188	KUE_C_2017	pLARmEB	Excalibur_c26527_178	2B	777143613	777.144	14.6792	15.6536	0.033	0.0506
	189	KUtE_C_2017	pLARmEB	BS00022478_51	2B	783226928	783.227	6.2402	7.0812	0.4503	0.4438
	190	CHL_T_2016	MLM	BS00022478_51	2B	783226928	783.227		5.10863	0.32673
	191	KUE_C_H	FASTmrMLM	BS00067878_51	2B	784621033	784.621	5.9462	6.7774	18.5397	0.4607
	192	FW_T_H	FASTmrMLM	BS00056645_51	2B	793148630	793.149	11.6648	12.6353	0.0487	0.0843
	193	KUE_T_2018	pLARmEB	GENE-0676_322	2B	801222392	801.222	9.1561	10.076	1.1815	0.2079
	194	TN_C_2018	pLARmEB	Kukri_c19266_779	2D	2470497	2.4705	5.5384	6.3552	7.545	0.3371
	195	FW_T_H	FASTmrMLM	RAC875_c5577_1682	2D	6636121	6.63612	8.3015	9.2011	0.0278	0.0393
	196	FW_T_H	pLARmEB	RAC875_c5577_1682	2D	6636121	6.63612	10.5025	11.451	0.0016	0.0393
	197	SW_T_H	FASTmrMLM	RAC875_c5577_1682	2D	6636121	6.63612	6.4084	7.2549	0.0403	0.0393
	198	KUE_T_2018	FASTmrMLM	wsnp_Ex_rep_c80588_75758453	2D	8717230	8.71723	13.3665	14.3635	0.0318	0.0562
	199	FW_T_H	pLARmEB	CAP8_c6474_94	2D	11460138	11.4601	6.2124	7.0525	5.1928e-05	0.0225
	200	KUE_C_2017	FASTmrMLM	BobWhite_c15073_502	2D	14395525	14.3955	13.39	14.3864	0.1696	0.073
	201	KUE_T_2018	FASTmrMLM	BobWhite_c15073_502	2D	14395525	14.3955	5.4457	6.2591	0.1187	0.073
	202	KUE_T_2018	pLARmEB	BobWhite_c15073_502	2D	14395525	14.3955	5.7227	6.5461	0.0615	0.073
	203	KUtE_T_2018	pLARmEB	Ex_c14755_1390	2D	20769509	20.7695	13.7211	14.7241	0.0752	0.2921
	204	KUtE_T_2018	pLARmEB	Excalibur_c20196_264	2D	29879871	29.8799	15.1999	15.9546	0.0037	0.0393
	205	KUtE_T_2017	FASTmrMLM	Kukri_rep_c110868_147	2D	97275522	97.2755	6.2374	7.0783	0.0923	0.2191
	206	KUtE_T_2018	pLARmEB	Tdurum_contig11768_756	2D	127115471	127.115	7.3546	8.2293	0.0529	0.2022
	207	SW_T_H	FASTmrMLM	Kukri_c10054_567	2D	128399271	128.399	5.1212	5.9222	0.2578	0.4607
	208	KUtE_C_2017	pLARmEB	RAC875_c20366_376	2D	330738253	330.738	9.8012	10.7353	0.0247	0.1854
	209	TKW_T_2017	FASTmrMLM	BS00076042_51	2D	602109336	602.109	5.4747	6.2891	24.2938	0.1798
	210	TKW_T_2017	pLARmEB	BS00076042_51	2D	602109336	602.109	5.4139	6.2261	21.3356	0.1798
	211	FW_T_H	pLARmEB	D_GDS7LZN02G73QS_245	2D	614751087	614.751	14.4881	15.4775	0.3224	0.4045
	212	HI_C_2017	FASTmrMLM	RAC875_c5673_1209	2D	622382766	622.383	8.8567	9.7697	0.1957	0.2303
	213	KUtE_T_2018	FASTmrMLM	RAC875_c31328_381	2D	629208199	629.208	6.7603	7.6177	0.0019	0.0337
	214	KUtE_C_2017	pLARmEB	BobWhite_c16248_216	2D	633851769	633.852	11.0472	12.0062	0.0868	0.0449
	215	KUtE_T_2018	pLARmEB	Kukri_c5276_801	2D	641603804	641.604	14.0996	15.1095	0.0048	0.1011
	216	KUE_T_2017	pLARmEB	BS00065434_51	2D	647665734	647.666	12.3783	13.3613	0.0704	0.427
	217	KUE_T_2017	pLARmEB	BobWhite_rep_c64888_511	3A	7476485	7.47649	5.6131	6.4326	0.0446	0.2584
	218	KUtE_T_2017	FASTmrMLM	Excalibur_c60530_113	3A	10586827	10.5868	8.4738	9.3777	0.0352	0.4719
	219	KUtE_T_2017	FASTmrMLM	Kukri_c54593_543	3A	13354520	13.3545	7.1685	8.0379	0.6293	0.4101
	220	KUE_C_2018	pLARmEB	wsnp_Ex_c55051_57706127	3A	25359161	25.3592	8.1869	9.0837	0.4807	0.2135
	221	KUtE_T_2018	FASTmrMLM	IAAV5729	3A	36921408	36.9214	14.5223	15.4775	0.0239	0.1292
	222	KUE_T_2017	pLARmEB	wsnp_Ex_c4094_7399975	3A	46165751	46.1658	12.0442	13.0211	0.4326	0.1124
	223	KUE_T_2017	pLARmEB	RAC875_c2464_274	3A	56676041	56.676	13.224	14.2222	0.1002	0.2135
	224	KUtE_T_H	pLARmEB	JD_c356_431	3A	517662054	517.662	5.858	6.6862	10.2494	0.0618
	225	KUtE_T_H	FASTmrMLM	Kukri_c36200_1000	3A	544394535	544.395	5.4141	6.2263	18.4521	0.1011
	226	KUE_C_2018	pLARmEB	Ku_c53625_627	3A	561118774	561.119	5.4443	6.2576	0.0125	0.3876
	227	KUtE_T_2018	FASTmrMLM	wsnp_Ex_c11877_19055556	3A	578873757	578.874	14.562	15.6536	0.0002	0.0112
	228	KUE_C_2017	FASTmrMLM	Ku_c61039_131	3A	605847997	605.848	7.5008	8.3795	0.0159	0.0337
	229	KUE_C_2017	pLARmEB	Ku_c61039_131	3A	605847997	605.848	9.8214	10.7559	0.0173	0.0337
	230	KUtE_C_2017	pLARmEB	BS00067748_51	3A	641407220	641.407	12.785	13.7756	0.1908	0.0506
	231	KUE_C_2018	pLARmEB	JD_c52237_348	3A	663176268	663.176	12.3217	13.3033	0.0042	0.0225
	232	KUtE_C_2017	FASTmrMLM	Kukri_c18258_440	3A	714425105	714.425	8.3006	9.2002	0.1054	0.1461
	233	KUE_C_2017	FASTmrMLM	Kukri_c18258_440	3A	714425105	714.425	6.9643	7.8278	0.3599	0.1461
	234	KUE_C_2017	pLARmEB	Kukri_c18258_440	3A	714425105	714.425	6.9213	7.7835	0.0381	0.1461
	235	FW_T_H	FASTmrMLM	BS00065673_51	3A	721666010	721.666	6.6831	7.5381	0.0323	0.0449
	236	HI_T_2017	FASTmrMLM	BobWhite_c29014_241	3A	727072931	727.073	7.418	8.2944	2.7193e-07	0.0281
	237	FW_T_H	FASTmrMLM	Ra_c7114_619	3A	727399261	727.399	7.3075	8.1809	0.2936	0.3933
	238	HI_T_2017	FASTmrMLM	RAC875_c99055_69	3A	728322677	728.323	5.3207	6.1294	4.8857	0.3258
	239	SL_C_H	mrMLM	GENE-2081_34	3A	735891449	735.891	9.1378	10.0573	35.2227	0.1437
	240	SL_C_H	pLARmEB	GENE-2081_34	3A	735891449	735.891	9.7763	10.7099	9.8325	0.1404
	241	KUtE_T_2017	pLARmEB	CAP7_c915_121	3A	736388750	736.389	6.7384	7.5951	0.0194	0.4326
	242	RW_C_H	FASTmrMLM	wsnp_Ku_c5359_9530161	3A	744436134	744.436	5.5018	6.3172	11.6827	0.4888
	243	RW_C_H	pLARmEB	wsnp_Ku_c5359_9530161	3A	744436134	744.436	5.842	6.6696	10.4547	0.4888
	244	KUE_C_2018	FASTmrMLM	tplb0028p23_691	3B	2519487	2.51949	10.2455	11.1888	0.2544	0.0674
	245	FW_T_H	FASTmrMLM	wsnp_Ra_c41135_48426638	3B	3408685	3.40869	9.7825	10.7162	0.4321	0.4213
	246	KUtE_C_2018	pLARmEB	Tdurum_contig47506_495	3B	4328329	4.32833	8.1084	9.0032	0.0137	0.0787
	247	KUtE_C_2018	pLARmEB	CAP7_c4121_370	3B	6250719	6.25072	5.32	6.1286	0.0841	0.1854
	248	TN_T_2017	mrMLM	BobWhite_c9992_862	3B	6395435	6.39543	6.0731	6.90859	10.9666	0.2989
	249	HI_T_2017	FASTmrMLM	RAC875_c76367_523	3B	10709748	10.7097	6.2688	7.1108	3.6882e-06	0.3146
	250	KUtE_C_2017	FASTmrMLM	RAC875_c21604_1625	3B	13964016	13.964	5.57	6.3879	5.5593	0.4045
	251	TN_C_2018	pLARmEB	RAC875_c34649_1053	3B	13967077	13.9671	7.5062	8.3851	28.2169	0.4326
	252	KUE_T_2017	pLARmEB	Tdurum_contig22897_107	3B	24942898	24.9429	10.2889	11.2331	0.0262	0.1011
	253	RL_T_2017	mrMLM	BS00011806_51	3B	35322028	35.322	5.4151	6.22732	14.1971	0.2394
	254	RL_T_2017	FASTmrMLM	BS00011806_51	3B	35322028	35.322	6.3793	7.2248	9.781	0.2466
	255	FW_T_H	pLARmEB	BS00068168_51	3B	35634072	35.6341	6.0071	6.8404	0.0003	0.0169
	256	SW_T_H	FASTmrMLM	Tdurum_contig81690_353	3B	66180408	66.1804	6.0068	6.8401	0.0588	0.0787
	257	KUpE_C_2017	pLARmEB	BobWhite_c9850_306	3B	296502406	296.502	6.5855	7.4375	1.969	0.4719
	258	CHL_14DAG_T_H	pLARmEB	BobWhite_c17332_325	3B	457978554	457.979	6.4739	7.3224	15.9382	0.2303
	259	KUtE_C_2018	pLARmEB	wsnp_Ex_c1116_2138756	3B	462099622	462.1	7.4118	8.2881	0.2643	0.1573
	260	KUE_C_2018	FASTmrMLM	wsnp_Ex_c1116_2138756	3B	462099622	462.1	10.7723	11.7261	1.7403	0.1573
	261	FW_T_H	FASTmrMLM	RAC875_c29367_314	3B	467335886	467.336	7.1677	8.0371	0.368	0.073
	262	FW_C_H	FASTmrMLM	IACX11310	3B	586512242	586.512	9.7865	10.7203	0.0574	0.2697
	263	FW_C_H	FASTmrMLM	wsnp_Ex_c17407_26107953	3B	681100205	681.1	10.0103	10.9488	0.0835	0.0618
	264	PH_T_2017	pLARmEB	wsnp_Ex_c19778_28779907	3B	739170520	739.171	5.7087	6.5316	3.5035	0.4326
	265	KUtE_C_2018	pLARmEB	TA002070-0603-w	3B	761005338	761.005	5.5461	6.3632	0.5384	0.191
	266	KUtE_T_2018	FASTmrMLM	wsnp_CAP12_c2297_1121142	3B	783466186	783.466	5.752	6.5764	0.1554	0.2079
	267	FW_T_H	FASTmrMLM	Tdurum_contig11114_335	3B	822828858	822.829	12.1078	13.0859	0.004	0.0112
	268	KUE_T_2017	pLARmEB	Excalibur_c57482_473	3D	2596417	2.59642	6.1983	7.038	0.2588	0.1517
	269	KUtE_C_2017	pLARmEB	Excalibur_c18826_452	3D	2597073	2.59707	8.9395	9.8545	0.1785	0.5
	270	KUE_T_2017	pLARmEB	wsnp_JD_c5170_6293946	3D	3301384	3.30138	10.8227	11.7775	1.936	0.4831
	271	KUE_C_2018	pLARmEB	BobWhite_rep_c49779_74	3D	92749990	92.75	5.8675	6.696	0.0136	0.0449
	272	FW_T_H	pLARmEB	wsnp_Ex_c18250_27065775	3D	122454668	122.455	9.5955	10.5252	0.0036	0.2865
	273	DM_T_2018	pLARmEB	RAC875_c26039_1567	3D	584335777	584.336	6.1293	6.9667	9.8478	0.0955
	274	KUE_T_2017	pLARmEB	Tdurum_contig8061_56	4A	24764302	24.7643	14.1916	15.1764	0.0034	0.0393
	275	FW_C_H	FASTmrMLM	wsnp_JD_c13364_13377722	4A	43698729	43.6987	12.8971	13.8901	12.7887	0.4382
	276	FW_T_H	FASTmrMLM	Tdurum_contig9906_89	4A	45109781	45.1098	12.6432	13.6303	0.2757	0.236
	277	FW_C_H	FASTmrMLM	Ra_c492_1845	4A	46123570	46.1236	9.5899	10.5195	0.6508	0.2528
	278	FW_T_H	FASTmrMLM	BobWhite_c20514_70	4A	46172347	46.1723	5.9918	6.8246	0.0031	0.2191
	279	PH_C_2018	mrMLM	wsnp_Ku_c11945_19406789	4A	231002068	231.002	5.3492	6.15894	11.8121	0.4425
	280	KUE_C_2017	FASTmrMLM	BobWhite_c20183_318	4A	558216958	558.217	14.3461	15.3525	0.1074	0.2135
	281	KUtE_T_2018	FASTmrMLM	Excalibur_c80450_75	4A	577863491	577.863	11.6213	12.591	0.0042	0.0449
	282	BY_T_2018	FASTmrMLM	Tdurum_contig22511_355	4A	624123254	624.123	5.7669	6.5919	39.7165	0.4663
	283	KUE_C_2018	FASTmrMLM	Kukri_c35049_357	4A	625396699	625.397	13.6104	14.6122	0.7519	0.2303
	284	KUtE_T_2018	FASTmrMLM	RAC875_c390_1494	4A	631575032	631.575	6.4217	7.2686	0.0825	0.0506
	285	KUtE_T_2017	pLARmEB	GENE-3129_436	4A	674554463	674.554	8.7726	9.6837	0.0015	0.0281
	286	KUtE_T_2018	pLARmEB	Kukri_rep_c96828_86	4A	690970262	690.97	11.3236	12.2878	0.1062	0.2809
	287	RL_C_2018	pLARmEB	IAAV1106	4A	712597176	712.597	6.6295	7.4829	3.5682	0.3933
	288	KUtE_C_2018	pLARmEB	BobWhite_c3259_96	4A	724855804	724.856	7.1008	7.9683	0.0105	0.3596
	289	BY_T_2018	MLM	RFL_Contig2531_987	4A	727117255	727.117		5.05292	0.30364
	290	KUtE_C_2018	pLARmEB	BS00081698_51	4A	733696286	733.696	7.5611	8.4415	0.0068	0.0169
	291	KUE_C_2018	FASTmrMLM	RAC875_s119811_122	4A	734017806	734.018	5.0292	5.8265	0.0347	0.0787
	292	KUE_T_2018	pLARmEB	Tdurum_contig42642_723	4A	737340693	737.341	13.8848	14.8754	0.0419	0.0506
	293	KUE_C_2018	FASTmrMLM	Kukri_c3866_718	4A	743952566	743.953	6.285	7.1275	0.426	0.1685
	294	KUtE_T_2018	pLARmEB	RAC875_c24030_136	4B	3733261	3.73326	6.1144	6.9513	0.0564	0.5
	295	SpL_C_2017	FASTmrMLM	BS00011510_51	4B	16056666	16.0567	5.6577	6.4788	8.6854	0.2022
	296	KUtE_T_2018	pLARmEB	Kukri_c49506_396	4B	17044001	17.044	5.4586	6.2724	0.0139	0.0562
	297	KUtE_C_2017	FASTmrMLM	wsnp_Ra_c9823_16313377	4B	22848678	22.8487	7.0876	7.9547	0.9389	0.1573
	298	KUtE_T_2018	pLARmEB	IACX5762	4B	65946277	65.9463	13.3516	14.3525	4.229e-05	0.0112
	299	KUtE_C_2017	pLARmEB	Kukri_c52736_422	4B	446516808	446.517	6.3477	7.1922	0.028	0.0393
	300	KUtE_T_2018	FASTmrMLM	BS00094557_51	4B	548120919	548.121	11.3407	12.3053	0.1891	0.1573
	301	KUtE_T_2018	FASTmrMLM	Excalibur_c23403_1118	4B	549134603	549.135	10.8915	11.8476	0.3035	0.1629
	302	KUtE_T_2018	FASTmrMLM	wsnp_CAP12_rep_c4278_1949864	4B	552018251	552.018	5.4146	6.2268	0.2465	0.1742
	303	KUE_T_2017	pLARmEB	BS00068456_51	4B	570893141	570.893	15.0062	15.9546	0.4135	0.4944
	304	KUE_C_2018	pLARmEB	BS00023035_51	4B	636917337	636.917	6.0328	6.8669	0.0623	0.1011
	305	RL_C_2018	pLARmEB	Kukri_c7241_322	4B	637387883	637.388	5.0785	5.8778	2.5309	0.0955
	306	PH_C_2018	pLARmEB	wsnp_Ex_rep_c67159_65649966	4B	637390195	637.39	7.6123	8.4941	15.072	0.3371
	307	KUE_C_2017	FASTmrMLM	Kukri_rep_c101259_81	4B	657274231	657.274	7.771	8.657	0.3723	0.2978
	308	KUE_T_2017	pLARmEB	RAC875_c5802_144	4B	666049153	666.049	5.0644	5.8631	0.0054	0.1348
	309	BY_T_2017	pLARmEB	BS00014101_51	4B	667685174	667.685	5.178	5.9812	9.2776	0.5
	310	KUE_T_2017	pLARmEB	wsnp_BF145459D_Ta_2_1	4D	453220983	453.221	11.6395	12.6094	0.0025	0.0337
	311	KUE_C_2018	FASTmrMLM	wsnp_BF145459D_Ta_2_1	4D	453220983	453.221	14.9489	15.9546	0.0101	0.0337
	312	KUE_C_2018	pLARmEB	wsnp_BF145459D_Ta_2_1	4D	453220983	453.221	5.6214	6.4412	0.0056	0.0337
	313	SW_T_H	FASTmrMLM	wsnp_BF145459D_Ta_2_1	4D	453220983	453.221	10.7424	11.6956	0.0045	0.0337
	314	RW_T_H	pLARmEB	Excalibur_rep_c109400_103	4D	461226413	461.226	5.2708	6.0776	6.9956	0.0562
	315	Chl_C_2018	FASTmrMLM	RAC875_c47328_483	4D	494056241	494.056	6.1772	7.0162	11.5752	0.309
	316	Chl_C_2018	pLARmEB	RAC875_c47328_483	4D	494056241	494.056	5.5666	6.3844	11.0389	0.309
	317	KUtE_T_2018	pLARmEB	GENE-3324_338	5A	3521325	3.52133	9.9726	10.9103	0.2037	0.4607
	318	RL_T_H	FASTmrMLM	BS00101071_51	5A	8059402	8.0594	6.5007	7.3501	9.5613	0.4944
	319	RL_T_H	pLARmEB	BS00101071_51	5A	8059402	8.0594	5.6623	6.4836	7.8455	0.4944
	320	RW_T_H	pLARmEB	BS00101071_51	5A	8059402	8.0594	5.2505	6.0565	3.602	0.4944
	321	FW_C_H	FASTmrMLM	wsnp_Ku_c9559_16000086	5A	8243590	8.24359	5.4636	6.2776	0.1837	0.4045
	322	KUE_T_2017	pLARmEB	BS00030991_51	5A	19268594	19.2686	7.2089	8.0795	0.0004	0.0112
	323	KUtE_C_2018	pLARmEB	BS00030991_51	5A	19268594	19.2686	11.897	12.8714	0.0009	0.0112
	324	KUE_C_2017	pLARmEB	Ku_c7910_1651	5A	20818412	20.8184	14.3524	15.3525	0.0023	0.3315
	325	KUtE_T_2018	pLARmEB	Excalibur_c5398_695	5A	30027274	30.0273	8.8605	9.7736	5.2567	0.3989
	326	KUE_C_2018	pLARmEB	BS00078076_51	5A	409323859	409.324	14.0051	15.0003	0.0039	0.0562
	327	TN_C_2017	FASTmrMLM	BS00003618_51	5A	482119825	482.12	5.3924	6.2038	9.0076	0.382
	328	TN_C_2017	pLARmEB	BS00003618_51	5A	482119825	482.12	8.8448	9.7576	11.7715	0.382
	329	KUtE_T_2017	pLARmEB	BS00069176_51	5A	485598276	485.598	10.3064	11.251	0.4089	0.2191
	330	KUE_T_2018	FASTmrMLM	BobWhite_c5540_416	5A	519905749	519.906	7.6018	8.4833	0.0379	0.1011
	331	KUE_T_2017	pLARmEB	wsnp_Ex_c7487_12808011	5A	536677423	536.677	7.9086	8.7982	0.077	0.4494
	332	KUE_T_2018	pLARmEB	BobWhite_rep_c57159_360	5A	536677525	536.678	11.1591	12.1202	0.3596	0.0618
	333	KUE_T_2018	FASTmrMLM	RAC875_c103967_76	5A	537354458	537.354	6.7271	7.5835	0.0241	0.0449
	334	KUtE_C_2018	pLARmEB	Kukri_c20258_143	5A	540613173	540.613	6.3655	7.2106	0.1529	0.1404
	335	PH_T_2017	pLARmEB	wsnp_Ex_c18941_27840714	5A	547647410	547.647	7.3802	8.2556	6.9379	0.191
	336	FW_T_H	pLARmEB	RAC875_rep_c91682_90	5A	558689050	558.689	5.9021	6.7318	0.0159	0.1966
	337	KUE_T_2018	FASTmrMLM	BobWhite_c14028_182	5A	571789596	571.79	11.1176	12.078	1.5449	0.191
	338	KUtE_T_2017	FASTmrMLM	Ex_c27046_1546	5A	574750070	574.75	7.9653	8.8564	0.0585	0.0337
	339	RL_T_H	pLARmEB	BobWhite_rep_c63332_67	5A	677845660	677.846	5.5186	6.3347	7.7367	0.3539
	340	RW_T_H	pLARmEB	BS00022299_51	5A	679740078	679.74	5.9339	6.7647	3.7729	0.4438
	341	KUtE_T_2018	pLARmEB	wsnp_CAP11_c1116_654975	5A	684939687	684.94	6.8149	7.6739	0.0779	0.3539
	342	KUtE_T_2017	pLARmEB	Ra_c11529_647	5A	685557599	685.558	11.7293	12.7008	0.1792	0.1629
	343	KUE_T_2017	pLARmEB	Kukri_c16087_281	5A	702166101	702.166	9.3266	10.2504	0.1094	0.3034
	344	KUE_T_2018	pLARmEB	Tdurum_contig12204_1131	5A	705442972	705.443	13.4127	14.4105	0.0101	0.0281
	345	KUtE_T_2017	pLARmEB	RAC875_rep_c114631_389	5B	16034591	16.0346	10.5961	11.5464	1.8925	0.4775
	346	Na+_C_2018	pLARmEB	RAC875_c33933_350	5B	20671175	20.6712	6.0881	6.9241	9.6732	0.2978
	347	SpL_C_2018	pLARmEB	Excalibur_c13536_202	5B	34039822	34.0398	6.461	7.3091	5.9653	0.073
	348	KUE_C_2018	FASTmrMLM	Excalibur_c13536_202	5B	34039822	34.0398	11.4679	12.4348	0.0189	0.073
	349	KUtE_T_2017	pLARmEB	Kukri_c2827_439	5B	53662672	53.6627	7.5741	8.4548	0.6424	0.4831
	350	KUtE_T_2017	pLARmEB	RAC875_c45619_224	5B	64733088	64.7331	12.2149	13.1949	0.0013	0.0169
	351	KUE_C_2018	FASTmrMLM	RAC875_c45619_224	5B	64733088	64.7331	5.0989	5.899	0.0053	0.0169
	352	KUtE_T_2017	pLARmEB	BobWhite_c4852_323	5B	68358991	68.359	9.0182	9.935	0.0127	0.0674
	353	Zn_T_2017	FASTmrMLM	Excalibur_c7286_975	5B	72099969	72.1	5.7416	6.5657	15.5922	0.3933
	354	Zn_T_2017	pLARmEB	Excalibur_c7286_975	5B	72099969	72.1	5.0072	5.8036	16.0851	0.3933
	355	Na+_C_2018	pLARmEB	wsnp_Ex_c13496_21243167	5B	74999804	74.9998	6.0019	6.835	10.4161	0.427
	356	KUtE_C_2017	FASTmrMLM	Ku_c32395_173	5B	176580625	176.581	9.5173	10.4453	0.3376	0.0506
	357	KUtE_C_2018	pLARmEB	wsnp_Ex_rep_c66881_65284662	5B	342873656	342.874	5.789	6.6148	0.0783	0.3483
	358	BY_C_2016	pLARmEB	wsnp_Ex_c2615_4862266	5B	475586840	475.587	7.5825	8.4635	12.5313	0.1644
	359	RL_C_2018	mrMLM	RFL_Contig4751_1197	5B	482291047	482.291	6.3467	7.19118	18.2644	0.0172
	360	KUtE_T_2018	pLARmEB	Kukri_c34340_391	5B	508778825	508.779	7.9655	8.8566	0.0008	0.0112
	361	CHL_T_2016	mrMLM	BobWhite_c6633_395	5B	531599374	531.599	5.1422	5.94398	60.1873	0.4859
	362	KUtE_T_2017	pLARmEB	Ku_c2346_1339	5B	536515270	536.515	8.6192	9.5266	0.1006	0.0506
	363	KUE_C_2018	FASTmrMLM	Ku_c2346_1339	5B	536515270	536.515	8.4331	9.336	0.026	0.0506
	364	KUE_C_2018	pLARmEB	Ku_c2346_1339	5B	536515270	536.515	15.0691	15.9546	0.0094	0.0506
	365	FW_T_H	FASTmrMLM	wsnp_Ex_c3834_6971712	5B	536516487	536.516	5.7368	6.5607	0.1044	0.0449
	366	KUtE_C_2017	pLARmEB	Tdurum_contig10210_428	5B	550728917	550.729	11.8592	12.833	0.0241	0.0562
	367	KUtE_C_2017	pLARmEB	BS00029915_51	5B	558346572	558.347	5.2551	6.0613	0.0765	0.0281
	368	KUE_T_2018	FASTmrMLM	BS00029915_51	5B	558346572	558.347	5.7685	6.5935	0.0113	0.0281
	369	KUtE_T_2017	pLARmEB	IAAV1888	5B	586352242	586.352	5.7644	6.5893	0.0858	0.1011
	370	KUtE_T_2018	pLARmEB	Excalibur_c100531_251	5B	591108072	591.108	6.335	7.1791	0.2128	0.1854
	371	KUtE_C_2018	pLARmEB	Tdurum_contig50731_961	5B	617709959	617.71	13.852	14.8754	0.1187	0.0899
	372	KUE_T_2018	pLARmEB	Tdurum_contig97407_196	5B	647940863	647.941	14.1002	15.1095	0.0166	0.0393
	373	KUpE_T_H	FASTmrMLM	BS00064272_51	5B	656713538	656.714	5.6728	6.4944	8.9069	0.236
	374	Na+_T_2017	mrMLM	Tdurum_contig8210_317	5B	669483487	669.483	5.3557	6.16569	9.0809	0.2299
	375	GY_T_2017	FASTmrMLM	RAC875_rep_c111379_703	5B	669550549	669.551	5.2276	6.0327	6.2041	0.264
	376	KUE_T_2017	FASTmrMLM	RAC875_rep_c111379_703	5B	669550549	669.551	6.2576	7.0992	8.3253	0.264
	377	HI_T_2017	FASTmrMLM	wsnp_CAP12_c2231_1090724	5B	672594804	672.595	5.4461	6.2595	5.8274	0.4607
	378	KUtE_T_2017	pLARmEB	wsnp_JD_c8978_9893945	5B	679347089	679.347	14.0518	15.0515	1.9011	0.1685
	379	KUE_T_2018	FASTmrMLM	Excalibur_c54637_123	5B	689375749	689.376	10.1571	11.0986	0.0564	0.0506
	380	KUE_T_2018	pLARmEB	Excalibur_c54637_123	5B	689375749	689.376	9.1727	10.093	0.0214	0.0506
	381	FW_T_H	pLARmEB	Ra_c3287_1405	5B	695492536	695.493	9.9672	10.9048	7.9767	0.1011
	382	KUE_T_2018	pLARmEB	Ku_c10913_2542	5B	695778572	695.779	6.8069	7.6657	0.0852	0.1517
	383	KUE_C_2018	FASTmrMLM	RAC875_c65269_290	5B	702624831	702.625	6.5646	7.416	0.0143	0.2528
	384	KUtE_T_2018	pLARmEB	RAC875_c37988_243	5B	712851517	712.852	6.0668	6.9021	0.019	0.2191
	385	KUE_C_2017	pLARmEB	JG_c1426_201	5B	712907184	712.907	11.8037	12.7765	0.0025	0.0169
	386	PH_C_2018	pLARmEB	Kukri_c9358_269	5D	9732395	9.7324	7.0023	7.8669	19.0507	0.1292
	387	FW_T_H	FASTmrMLM	Kukri_c9358_269	5D	9732395	9.7324	5.7762	6.6015	0.001	0.1292
	388	KUtE_C_2017	pLARmEB	wsnp_JD_c43684_30430706	5D	188335587	188.336	5.2208	6.0256	0.0182	0.0393
	389	KUE_C_2018	pLARmEB	wsnp_Ex_c14182_22122844	5D	320888516	320.889	6.9913	7.8556	0.7121	0.3539
	390	KUtE_T_2018	pLARmEB	Kukri_c805_325	5D	386652270	386.652	13.1208	14.1157	0.4651	0.4382
	391	KUE_T_2018	pLARmEB	Kukri_c805_325	5D	386652270	386.652	7.9924	8.8842	1.3191	0.4382
	392	KUtE_T_2018	FASTmrMLM	RAC875_c20530_1159	5D	478466774	478.467	6.8053	7.664	0.0014	0.0225
	393	KUtE_T_2018	pLARmEB	RAC875_c20530_1159	5D	478466774	478.467	6.9813	7.8453	0.0007	0.0225
	394	KUE_C_2017	pLARmEB	BS00066224_51	5D	526451415	526.451	9.6421	10.5728	0.1215	0.1292
	395	KUtE_C_2018	pLARmEB	BS00089078_51	5D	549579051	549.579	7.3394	8.2136	2.2482	0.4382
	396	KUtE_T_2018	pLARmEB	Excalibur_c16376_351	6A	4769490	4.76949	13.5621	14.5566	0.18	0.4157
	397	KUE_C_2018	FASTmrMLM	Ex_c2978_643	6A	12387144	12.3871	13.3116	14.3111	0.0187	0.3596
	398	KUtE_C_2018	pLARmEB	Excalibur_c64989_250	6A	12392149	12.3921	5.8304	6.6576	1.2647	0.3315
	399	KUE_C_2018	FASTmrMLM	Excalibur_c64989_250	6A	12392149	12.3921	13.7354	14.7505	3.0442	0.3315
	400	KUE_C_2018	pLARmEB	Excalibur_c64989_250	6A	12392149	12.3921	7.5175	8.3967	0.5355	0.3315
	401	FW_T_H	FASTmrMLM	Kukri_rep_c69659_71	6A	13074556	13.0746	7.0557	7.9219	0.007	0.1292
	402	SL_T_H	mrMLM	wsnp_Ex_c52849_56297163	6A	13076345	13.0763	5.0635	5.86217	15.0137	0.1034
	403	FW_T_H	FASTmrMLM	wsnp_Ku_rep_c69659_69084797	6A	13076478	13.0765	12.876	13.8682	0.092	0.1348
	404	TN_C_2017	pLARmEB	Excalibur_c49745_628	6A	18464388	18.4644	5.4685	6.2827	4.6343	0.1348
	405	BY_T_2017	mrMLM	GENE-4142_882	6A	20767997	20.768	7.8031	8.68996	13.3873	0.046
	406	NA_C_H	mrMLM	Kukri_c7458_1332	6A	23722752	23.7228	6.9528	7.81594	33.9611	0.1609
	407	Na+_C_H	mrMLM	Kukri_c7458_1332	6A	23722752	23.7228	6.9528	7.81594	33.9611	0.1609
	408	KUE_C_2018	pLARmEB	wsnp_JD_c3441_4455541	6A	24829659	24.8297	5.1128	5.9134	0.0003	0.3989
	409	KUtE_T_2018	pLARmEB	wsnp_Ex_c15378_23638822	6A	49193147	49.1931	10.5377	11.4869	0.0338	0.2978
	410	HI_C_2017	FASTmrMLM	Excalibur_c6057_281	6A	63775433	63.7754	8.8508	9.7637	0.0005	0.4157
	411	KUE_C_2018	pLARmEB	wsnp_Ex_c29025_38097560	6A	70428095	70.4281	12.2292	13.2095	0.6155	0.3034
	412	FW_T_H	pLARmEB	Jagger_c8372_125	6A	71181774	71.1818	6.0264	6.8603	0.0385	0.2584
	413	HI_C_2017	FASTmrMLM	Excalibur_c30324_564	6A	73642303	73.6423	7.5427	8.4226	0.0005	0.3596
	414	KUE_C_2018	FASTmrMLM	BobWhite_c4255_127	6A	210950123	210.95	10.1468	11.0881	0.0259	0.0843
	415	FW_T_H	FASTmrMLM	Kukri_c16868_1062	6A	335780010	335.78	7.4193	8.2958	0.0741	0.0787
	416	FW_T_H	FASTmrMLM	CAP8_c8024_128	6A	492282338	492.282	8.7114	9.621	0.0465	0.2416
	417	FW_T_H	FASTmrMLM	IAAV1652	6A	544204977	544.205	5.7855	6.6111	0.0011	0.2809
	418	BY_C_2017	mrMLM	wsnp_Ex_c48789_53586502	6A	550073992	550.074	6.4027	7.24897	23.9023	0.408
	419	BY_C_2017	FASTmrMLM	wsnp_Ex_c48789_53586502	6A	550073992	550.074	5.2139	6.0185	22.7306	0.3989
	420	BY_C_2017	pLARmEB	wsnp_Ex_c48789_53586502	6A	550073992	550.074	5.2139	6.0185	23.2509	0.3989
	421	KUE_C_2017	pLARmEB	wsnp_Ex_c48789_53586502	6A	550073992	550.074	10.615	11.5657	0.0557	0.3989
	422	KUE_C_2017	pLARmEB	wsnp_Ex_c48789_53586406	6A	550074242	550.074	12.7164	13.7042	0.0948	0.3933
	423	KUtE_C_2018	pLARmEB	RAC875_c26820_847	6A	573123775	573.124	5.4291	6.2418	0.0211	0.0449
	424	KUtE_C_2017	pLARmEB	Excalibur_c55844_143	6A	600456991	600.457	13.9909	15.0003	0.0678	0.0674
	425	KUtE_C_2017	pLARmEB	wsnp_JD_rep_c65886_41872083	6A	608632185	608.632	6.8661	7.7267	1.5494	0.2472
	426	KUE_C_2018	pLARmEB	Excalibur_c9754_1428	6A	609257585	609.258	6.3099	7.1532	0.7548	0.3483
	427	KUE_C_2018	FASTmrMLM	wsnp_Ra_c13998_21994095	6A	615458409	615.458	5.869	6.6975	0.0678	0.0955
	428	KUE_C_2018	pLARmEB	wsnp_Ra_c13998_21994095	6A	615458409	615.458	12.0528	13.0303	0.195	0.0955
	429	FW_T_H	FASTmrMLM	BS00082893_51	6B	166226	0.166226	8.1881	9.0849	0.6541	0.4663
	430	KUtE_T_2017	pLARmEB	BS00075789_51	6B	1969989	1.96999	11.801	12.7739	0.0239	0.4494
	431	Chl_T_2018	pLARmEB	Tdurum_contig42655_1727	6B	12671291	12.6713	5.1877	5.9913	7.1155	0.1124
	432	CHL_T_2018	MLM	Kukri_c24795_267	6B	20681251	20.6813		5.47907	0.35622
	433	KUtE_T_2018	pLARmEB	Tdurum_contig29033_75	6B	67937993	67.938	6.2651	7.1069	0.0005	0.0169
	434	KUE_C_2018	FASTmrMLM	CAP8_c1361_225	6B	91167467	91.1675	5.175	5.9781	0.0291	0.0393
	435	KUtE_T_2018	pLARmEB	Kukri_rep_c113626_110	6B	103785098	103.785	11.5242	12.492	0.1888	0.0787
	436	KUE_T_2018	pLARmEB	Kukri_rep_c113626_110	6B	103785098	103.785	9.416	10.3418	1.7058	0.0787
	437	SW_T_H	FASTmrMLM	wsnp_Ra_c57648_59682822	6B	181102991	181.103	5.8276	6.6547	0.0724	0.2472
	438	KUtE_T_2018	FASTmrMLM	BS00022772_51	6B	240543564	240.544	11.1665	12.1278	0.0036	0.0337
	439	KUE_T_2018	pLARmEB	BS00022772_51	6B	240543564	240.544	15.1782	15.9546	0.047	0.0337
	440	KUE_C_2017	FASTmrMLM	Tdurum_contig55473_381	6B	582825019	582.825	7.4791	8.3572	0.0078	0.073
	441	HI_C_2017	FASTmrMLM	Tdurum_contig50382_639	6B	604217180	604.217	11.1785	12.14	0.0001	0.3652
	442	KUE_T_2018	FASTmrMLM	Kukri_c9150_1181	6B	653883840	653.884	12.5462	13.5313	0.0178	0.0225
	443	CHL_C_2016	pLARmEB	RAC875_c4030_1595	6B	706118794	706.119	6.8933	7.7547	8.7259	0.0274
	444	KUtE_C_2018	pLARmEB	Kukri_c19309_1803	6B	715953504	715.954	8.8879	9.8017	0.0367	0.5
	445	KUE_C_2018	pLARmEB	Kukri_c19309_1803	6B	715953504	715.954	11.4149	12.3808	1.6107	0.5
	446	KUE_C_2018	FASTmrMLM	Excalibur_c4789_2748	6D	1413329	1.41333	9.4846	10.4119	0.0272	0.0337
	447	KUE_T_2017	pLARmEB	Kukri_c21405_2131	6D	2406212	2.40621	14.3253	15.3525	0.1233	0.1629
	448	SpL_T_2017	pLARmEB	BobWhite_c7090_123	6D	5065255	5.06525	5.1309	5.9322	10.1479	0.3483
	449	KUtE_T_2018	FASTmrMLM	BS00021970_51	6D	24003436	24.0034	14.4044	15.4775	0.0016	0.0337
	450	KUtE_T_2018	pLARmEB	RAC875_c26177_632	6D	26245017	26.245	8.3769	9.2784	0.0285	0.3202
	451	KUE_C_2018	FASTmrMLM	BobWhite_c15526_58	6D	129522614	129.523	11.3522	12.3169	0.0024	0.0169
	452	FW_C_H	FASTmrMLM	IAAV7251	6D	309588003	309.588	6.1501	6.9882	0.3317	0.073
	453	Na+_C_2018	pLARmEB	IAAV7251	6D	309588003	309.588	5.259	6.0653	8.0196	0.073
	454	KUE_C_2018	FASTmrMLM	RAC875_rep_c111047_466	6D	380488735	380.489	6.8855	7.7466	0.008	0.0169
	455	FW_T_H	FASTmrMLM	Excalibur_rep_c105550_175	6D	397353234	397.353	12.6954	13.6827	0.0641	0.0281
	456	TN_C_2017	pLARmEB	Jagger_c7132_108	6D	461923722	461.924	5.729	6.5526	4.7554	0.4888
	457	KUE_C_2018	pLARmEB	GENE-3993_284	6D	462464731	462.465	5.3635	6.1738	0.6359	0.3315
	458	KUE_T_2018	FASTmrMLM	Kukri_c41086_105	6D	468910518	468.911	5.6862	6.5083	0.2588	0.0787
	459	HI_T_2017	mrMLM	Ra_c8058_1047	6D	469831336	469.831	5.5609	6.3785	36.5782	0.023
	460	FW_C_H	FASTmrMLM	CAP7_c2559_543	6D	471017889	471.018	10.2132	11.1559	1.6321	0.2753
	461	KUtE_C_2017	pLARmEB	Kukri_c44291_138	6D	471070735	471.071	7.644	8.5266	0.3077	0.1573
	462	SpL_C_2018	pLARmEB	RFL_Contig2615_982	6D	472890145	472.89	7.9677	8.8589	5.5745	0.1348
	463	DM_C_2018	mrMLM	GENE-3593_37	7A	1699666	1.69967	6.3598	7.2047	34.9355	0.0172
	464	DM_C_2018	FASTmrMLM	GENE-3593_37	7A	1699666	1.69967	6.3607	7.2056	27.2718	0.0169
	465	DM_C_2018	pLARmEB	GENE-3593_37	7A	1699666	1.69967	6.3607	7.2056	8.9513	0.0169
	466	FW_T_H	pLARmEB	GENE-3593_37	7A	1699666	1.69967	10.0781	11.018	2.1006e-05	0.0169
	467	FW_C_H	FASTmrMLM	BobWhite_c20558_374	7A	6537017	6.53702	7.0168	7.8818	0.3305	0.2135
	468	SpL_C_2018	pLARmEB	Tdurum_contig13245_443	7A	10908619	10.9086	6.4953	7.3445	6.5584	0.1236
	469	KUtE_T_2017	pLARmEB	RAC875_c48202_231	7A	12177316	12.1773	11.6277	12.5974	0.7545	0.4663
	470	SW_T_H	FASTmrMLM	Excalibur_c9183_1397	7A	12411398	12.4114	9.38	10.305	0.0084	0.073
	471	KUE_C_2018	FASTmrMLM	BS00021122_51	7A	14734883	14.7349	11.1389	12.0997	0.061	0.073
	472	KUtE_C_2017	pLARmEB	BS00078400_51	7A	31875862	31.8759	8.5815	9.488	4.3581	0.4719
	473	KUtE_C_2018	pLARmEB	Kukri_c107638_253	7A	32028594	32.0286	9.0876	10.006	0.0159	0.0506
	474	CHL_H_C_2017	pLARmEB	Excalibur_c14189_134	7A	47444419	47.4444	5.8337	6.661	12.0965	0.2079
	475	KUtE_T_2017	pLARmEB	BobWhite_c8076_300	7A	68889457	68.8895	5.9062	6.736	0.0367	0.073
	476	KUE_T_2017	pLARmEB	BobWhite_c8076_300	7A	68889457	68.8895	13.5473	14.5566	0.0224	0.073
	477	KUtE_T_2017	pLARmEB	GENE-4375_382	7A	79780963	79.781	7.635	8.5174	0.2431	0.2753
	478	FW_T_H	FASTmrMLM	wsnp_Ex_c13337_21022658	7A	81133978	81.134	6.5049	7.3544	0.9405	0.1854
	479	KUtE_C_2018	pLARmEB	IACX9283	7A	85414746	85.4147	11.8132	12.7864	3.8057	0.309
	480	SW_T_H	FASTmrMLM	JD_c19177_1462	7A	87307571	87.3076	6.0138	6.8473	0.0193	0.118
	481	GY_C_2016	pLARmEB	RAC875_c16287_726	7A	610208889	610.209	6.3247	7.1685	12.1787	0.4863
	482	HI_T_2016	pLARmEB	Kukri_c53682_85	7A	644619198	644.619	7.9731	8.8644	11.1291	0.3151
	483	KUE_T_2018	FASTmrMLM	BS00066295_51	7A	657375487	657.375	6.0333	6.8675	0.0023	0.0169
	484	KUE_C_2017	FASTmrMLM	BS00009838_51	7A	666607524	666.608	14.0126	15.0003	0.0157	0.0281
	485	KUE_C_2017	pLARmEB	BS00009838_51	7A	666607524	666.608	6.5296	7.3799	0.0063	0.0281
	486	KUtE_C_2017	pLARmEB	wsnp_JD_c149_238783	7A	670769304	670.769	10.872	11.8277	0.0596	0.1742
	487	KUE_T_2017	pLARmEB	wsnp_Ex_c11047_17915225	7A	670769585	670.77	7.9989	8.8909	0.1743	0.4382
	488	KUE_C_2017	FASTmrMLM	RAC875_c1115_341	7A	670780611	670.781	5.3602	6.1704	0.0275	0.2528
	489	SpS_T_2017	mrMLM	wsnp_Ku_rep_c104159_90704469	7A	674279479	674.279	8.7354	9.64559	37.2923	0.3276
	490	KUE_T_2018	pLARmEB	Excalibur_c14451_1137	7A	675268377	675.268	11.3421	12.3066	0.1204	0.0393
	491	KUtE_T_2018	pLARmEB	BS00022169_51	7A	691259651	691.26	11.0915	12.0514	0.0086	0.0618
	492	KUpE_C_2018	pLARmEB	wsnp_Ra_c35321_43882919	7A	692880472	692.88	5.696	6.5185	9.9784	0.3146
	493	KUE_T_2018	pLARmEB	wsnp_Ra_c35321_43882919	7A	692880472	692.88	6.2341	7.0749	0.3467	0.3146
	494	KUtE_C_2017	pLARmEB	BS00061940_51	7A	700274575	700.275	6.1051	6.9417	3.5216	0.2191
	495	KUtE_T_2017	FASTmrMLM	RAC875_rep_c110061_183	7A	700301431	700.301	7.5704	8.451	0.0003	0.0169
	496	KUE_C_2018	FASTmrMLM	Ex_c29172_877	7A	708363089	708.363	8.1186	9.0136	1.8217	0.427
	497	KUE_T_2018	pLARmEB	Excalibur_rep_c73544_223	7A	709406943	709.407	10.5363	11.4855	0.0119	0.073
	498	KUtE_T_2017	pLARmEB	Kukri_rep_c70199_638	7A	709407115	709.407	14.2539	15.2556	0.005	0.0393
	499	KUE_C_2017	FASTmrMLM	RAC875_c1606_644	7A	709885312	709.885	10.5064	11.455	0.4589	0.3034
	500	SpS_T_2017	FASTmrMLM	Ku_c19745_892	7A	712058659	712.059	6.3865	7.2323	7.795	0.236
	501	RL_C_2018	FASTmrMLM	wsnp_Ex_c5839_10246812	7A	717036867	717.037	6.6534	7.5075	7.0855	0.1629
	502	RL_C_2018	mrMLM	wsnp_Ra_c7112_12318340	7A	717040885	717.041	9.1056	10.0244	19.8488	0.1782
	503	KUE_C_2017	FASTmrMLM	BS00022137_51	7A	729397548	729.398	9.9935	10.9316	0.0616	0.0506
	504	KUE_T_2017	pLARmEB	Kukri_c60729_430	7B	12953101	12.9531	8.9084	9.8227	0.0036	0.0449
	505	FW_T_H	pLARmEB	wsnp_Ku_rep_c102842_89723861	7B	43880843	43.8808	5.8439	6.6716	0.0047	0.3708
	506	KUtE_T_2017	pLARmEB	BS00031746_51	7B	43882125	43.8821	14.0769	15.1095	0.349	0.4101
	507	KUE_T_2017	pLARmEB	BS00064344_51	7B	44878553	44.8786	6.7673	7.6249	1.1887	0.3315
	508	SW_C_H	pLARmEB	GENE-4862_901	7B	59647565	59.6476	5.8436	6.6713	2.9651	0.0787
	509	KUE_T_2017	pLARmEB	RAC875_c53629_760	7B	107100604	107.101	10.1089	11.0494	0.0494	0.0674
	510	KUE_C_2017	pLARmEB	BobWhite_c10017_644	7B	136312143	136.312	6.8722	7.7329	0.0269	0.1629
	511	TN_T_2017	mrMLM	Ku_c9598_2119	7B	159141848	159.142	5.1318	5.93317	11.0359	0.4483
	512	TN_T_2017	FASTmrMLM	Ku_c9598_2119	7B	159141848	159.142	5.1714	5.9743	8.6521	0.4382
	513	KUE_C_2017	FASTmrMLM	Ra_c19501_1510	7B	505294696	505.295	7.7127	8.5972	0.0656	0.0674
	514	KUE_T_2018	FASTmrMLM	BS00076675_51	7B	653289313	653.289	11.2122	12.1743	0.6228	0.4944
	515	KUtE_T_2018	pLARmEB	Excalibur_c91560_445	7B	658220471	658.22	6.2651	7.1069	0.0005	0.0169
	516	KUtE_T_2017	pLARmEB	Kukri_c55731_81	7B	700403758	700.404	6.391	7.2369	0.1787	0.1517
	517	KUE_C_2017	FASTmrMLM	BS00063641_51	7B	702528984	702.529	5.9458	6.777	0.0935	0.1011
	518	KUtE_C_2017	pLARmEB	Tdurum_contig42586_720	7B	718850865	718.851	7.8658	8.7543	1.1818	0.4888
	519	KUE_C_2018	FASTmrMLM	RAC875_c31851_529	7B	732399766	732.4	5.0068	5.8032	0.0212	0.0618
	520	KUtE_C_2017	pLARmEB	Ku_c35807_609	7B	745230917	745.231	9.7904	10.7243	1.0743	0.3371
	521	FW_T_H	pLARmEB	BS00097529_51	7B	750604062	750.604	5.1333	5.9347	0.0007	0.0169
	522	KUE_C_2018	FASTmrMLM	Kukri_c37227_579	7D	5049477	5.04948	13.0452	14.0408	0.0807	0.0281
	523	KUE_T_2018	FASTmrMLM	Kukri_c37227_579	7D	5049477	5.04948	7.8258	8.7133	0.0671	0.0281
	524	KUtE_T_2018	pLARmEB	BS00008445_51	7D	5180083	5.18008	12.9391	13.9293	0.1089	0.236
	525	KUE_T_2017	pLARmEB	IAAV6615	7D	22612166	22.6122	15.0632	15.9546	0.0013	0.0225
	526	KUE_C_2018	FASTmrMLM	GENE-4346_109	7D	71318625	71.3186	8.6639	9.5724	0.0786	0.0449
	527	GY_C_2016	pLARmEB	Kukri_c100613_331	7D	112431129	112.431	8.1334	9.0288	16.7557	0.4658
	528	KUtE_T_2018	FASTmrMLM	CAP7_c9278_185	7D	146106813	146.107	7.4625	8.3402	0.0081	0.0393
	529	KUtE_T_2018	pLARmEB	CAP7_c9278_185	7D	146106813	146.107	5.5462	6.3633	0.0213	0.0393
	530	KUtE_T_2018	FASTmrMLM	wsnp_Ex_c17346_26030825	7D	370181380	370.181	12.5457	13.5313	0.0598	0.1966
	531	SW_T_H	FASTmrMLM	Kukri_c58234_519	7D	413246857	413.247	9.2771	10.1998	0.3234	0.236
	532	SW_T_H	FASTmrMLM	Ex_c8238_637	7D	461205902	461.206	8.6955	9.6047	0.0713	0.382
	533	DM_T_2018	mrMLM	Tdurum_contig5360_95	7D	600451347	600.451	5.5066	6.32221	14.8848	0.3391
	534	KUE_C_2018	FASTmrMLM	BobWhite_c4240_78	7D	634694320	634.694	11.3092	12.2732	0.6131	0.4831
	*Trait nomenclature is presented in Table 2 legends.
	aSNPs highlighted in green and blue are detected by multiple GWAS models.
