# Supplementary material for: Genome-Wide Association Study and QTL Meta-Analysis Identified Novel Genomic Loci Controlling Potassium Use Efficiency and Agronomic Traits in Bread Wheat
Source: Front Plant Sci. 2020 Feb 18;11:70. doi: 10.3389/fpls.2020.00070 (PMC7041172; doi:10.3389/fpls.2020.00070)
Supplement: Supplementary file 8 [file Table_8.xlsx]

## Sheet: Table S8
	Table S8. Distribution of significant MTA over chromosomal loci on wheat genome.
	Loci	SNP Name	SNP IDa	Trait*	Method	Chr	Position†	LOD score	-log10p
	1	Ex_c5192_943	IWB20856	SpL_C_2018	pLARmEB	1A	485002381	5.9427	6.7738
		Ex_c5192_943	IWB20856	FW_T_H	FASTmrMLM	1A	485002381	11.6745	12.6452
	2	BobWhite_c23632_322	IWB1728	SpS_C_2018	FASTmrMLM	1A	539762835	6.0962	6.9325
		BobWhite_c23632_322	IWB1728	SpS_C_2018	pLARmEB	1A	539762835	8.0827	8.9768
	3	wsnp_Ra_c6891_11974621	IWA8051	KUtE_C_2017	pLARmEB	1A	581585520	10.3421	11.2874
		wsnp_Ra_c6891_11974621	IWA8051	KUE_C_2017	FASTmrMLM	1A	581585520	10.7226	11.6754
	4	Tdurum_contig47006_1105	IWB71743	TN_T_2017	mrMLM	1A	593549077	5.7176	6.54083
		Tdurum_contig47006_1105	IWB71743	TN_T_2017	FASTmrMLM	1A	593549077	5.0673	5.8661
	5	BS00022319_51	IWB7023	KUtE_T_2017	FASTmrMLM	1B	57430658	9.9494	10.8866
		BS00022319_51	IWB7023	KUtE_T_2017	pLARmEB	1B	57430658	12.0351	13.0121
		BS00066014_51	IWB9695	KUtE_T_2017	FASTmrMLM	1B	59514595	9.0076	9.9241
		BS00066014_51	IWB9695	KUtE_T_2017	pLARmEB	1B	59514595	8.8236	9.7359
	6	tplb0043a07_880	IWB74755	SpL_C_2017	pLARmEB	1B	637622677	6.3611	7.206
		tplb0043a07_880	IWB74755	SpS_T_2017	FASTmrMLM	1B	637622677	5.0117	5.8083
	7	CAP7_rep_c6352_375	IWB14436	KUtE_T_2017	FASTmrMLM	1B	668912357	6.5664	7.4178
		CAP7_rep_c6352_375	IWB14436	KUtE_T_2017	pLARmEB	1B	668912357	14.7235	15.6536
	8	BS00063418_51	IWB9054	KUE_C_2017	FASTmrMLM	1D	513174	14.2358	15.2556
		BS00063418_51	IWB9054	KUE_C_2017	pLARmEB	1D	513174	10.5132	11.4619
	9	Kukri_c13458_226	IWB41036	HI_C_2017	FASTmrMLM	1D	336365267	7.0105	7.8753
		Kukri_c13458_226	IWB41036	RL_C_H	pLARmEB	1D	336365267	6.588	7.4401
		Kukri_c13458_226	IWB41036	FW_T_H	FASTmrMLM	1D	336365267	10.9266	11.8834
		Kukri_c13458_226	IWB41036	FW_T_H	pLARmEB	1D	336365267	6.544	7.3947
	10	IAAV4656	IWB34905	FW_T_H	FASTmrMLM	1D	357459758	9.598	10.5277
		IAAV4656	IWB34905	FW_T_H	pLARmEB	1D	357459758	12.8293	13.8211
	11	Tdurum_contig560_239	IWB72480	RW_T_H	mrMLM	2A	72382644	8.4722	9.37605
		Tdurum_contig560_239	IWB72480	NA_T_H	pLARmEB	2A	72382644	5.5461	6.3632
	12	Excalibur_c74376_158	IWB28714	SL_T_H	mrMLM	2A	631640920	7.5488	8.42884
		Excalibur_c74376_158	IWB28714	SL_T_H	pLARmEB	2A	631640920	5.1791	5.9823
	13	BS00023144_51	IWB7444	FW_T_H	FASTmrMLM	2A	744329367	8.5156	9.4205
		BS00023144_51	IWB7444	FW_T_H	pLARmEB	2A	744329367	8.9033	9.8174
	14	Tdurum_contig52350_636	IWB72263	KUE_T_2018	FASTmrMLM	2A	759830158	5.0893	5.889
		Tdurum_contig52350_636	IWB72263	KUE_T_2018	pLARmEB	2A	759830158	5.9596	6.7913
	15	BobWhite_c11479_157	IWB223	TN_T_2017	mrMLM	2A	764657398	7.1016	7.96908
		BobWhite_c11479_157	IWB223	TN_T_2017	FASTmrMLM	2A	764657398	7.867	8.7555
		BobWhite_c11479_157	IWB223	TN_T_2017	pLARmEB	2A	764657398	10.7292	11.6821
		BobWhite_c11479_157	IWB223	BY_T_2017	FASTmrMLM	2A	764657398	5.7047	6.5275
		BobWhite_c11479_157	IWB223	BY_T_2017	pLARmEB	2A	764657398	5.0112	5.8078
		BobWhite_c11479_157	IWB223	KUE_T_2017	pLARmEB	2A	764657398	9.52	10.448
	16	BS00107857_51	IWB12337	RL_C_2018	FASTmrMLM	2A	774855770	5.0317	5.8291
		BS00107857_51	IWB12337	RL_C_2018	pLARmEB	2A	774855770	5.0606	5.8592
	17	GENE-0592_268	IWB31988	RL_T_H	FASTmrMLM	2B	35284538	6.017	6.8506
		GENE-0592_268	IWB31988	RL_T_H	pLARmEB	2B	35284538	7.8078	8.6948
		GENE-0592_268	IWB31988	RW_T_H	pLARmEB	2B	35284538	9.3304	10.2543
		GENE-0592_268	IWB31988	NA_T_H	mrMLM	2B	35284538	5.2352	6.04059
		GENE-0592_268	IWB31988	NA_T_H	FASTmrMLM	2B	35284538	5.2352	6.0406
		GENE-0592_127	IWB31987	CHL_21DAG_T_H	FASTmrMLM	2B	35284667	6.279	7.1213
		GENE-0592_127	IWB31987	CHL_21DAG_T_H	pLARmEB	2B	35284667	6.5561	7.4072
	18	BobWhite_c948_52	IWB4614	KUE_T_2017	pLARmEB	2B	180616389	6.8388	7.6985
		BobWhite_c948_52	IWB4614	SpL_C_2018	FASTmrMLM	2B	180616389	5.011	5.8076
		BobWhite_c948_52	IWB4614	SpL_C_2018	pLARmEB	2B	180616389	5.2065	6.0108
	19	wsnp_Ku_c2562_4879681	IWA6781	KUtE_C_2017	pLARmEB	2B	190225573	14.1701	15.1764
		wsnp_Ku_c2562_4879681	IWA6781	KUE_C_2017	FASTmrMLM	2B	190225573	12.5872	13.5744
		wsnp_Ku_c2562_4879681	IWA6781	KUE_C_2017	pLARmEB	2B	190225573	9.685	10.6166
	20	Excalibur_c99477_90	IWB29666	KUtE_C_2017	pLARmEB	2B	456176969	6.5944	7.4467
		Excalibur_c99477_90	IWB29666	KUE_C_2017	FASTmrMLM	2B	456176969	5.641	6.4615
	21	BS00046164_51	IWB8419	SpS_C_2017	mrMLM	2B	697510323	5.5186	6.33465
		BS00046164_51	IWB8419	SpS_C_2017	FASTmrEMMA	2B	697510323	5.3998	6.2115
		BS00046164_51	IWB8419	SpS_T_2017	FASTmrMLM	2B	697510323	5.736	6.5599
		BS00046164_51	IWB8419	SpS_T_2017	pLARmEB	2B	697510323	6.4351	7.2824
	22	Tdurum_contig29246_118	IWB69744	DM_T_2018	FASTmrMLM	2B	700741357	6.5778	7.4296
		Tdurum_contig29246_118	IWB69744	DM_T_2018	pLARmEB	2B	700741357	8.0427	8.9358
	23	BS00022478_51	IWB7106	KUtE_C_2017	pLARmEB	2B	783226928	6.2402	7.0812
		BS00022478_51	IWB7106	CHL_T_2016	MLM	2B	783226928		5.10514
	24	RAC875_c5577_1682	IWB59140	FW_T_H	FASTmrMLM	2D	6636121	8.3015	9.2011
		RAC875_c5577_1682	IWB59140	FW_T_H	pLARmEB	2D	6636121	10.5025	11.451
		RAC875_c5577_1682	IWB59140	SW_T_H	FASTmrMLM	2D	6636121	6.4084	7.2549
	25	BobWhite_c15073_502	IWB740	KUE_C_2017	FASTmrMLM	2D	14395525	13.39	14.3864
		BobWhite_c15073_502	IWB740	KUE_T_2018	FASTmrMLM	2D	14395525	5.4457	6.2591
		BobWhite_c15073_502	IWB740	KUE_T_2018	pLARmEB	2D	14395525	5.7227	6.5461
	26	BS00076042_51	IWB10849	TKW_T_2017	FASTmrMLM	2D	602109336	5.4747	6.2891
		BS00076042_51	IWB10849	TKW_T_2017	pLARmEB	2D	602109336	5.4139	6.2261
	27	Ku_c61039_131	IWB39719	KUE_C_2017	FASTmrMLM	3A	605847997	7.5008	8.3795
		Ku_c61039_131	IWB39719	KUE_C_2017	pLARmEB	3A	605847997	9.8214	10.7559
	28	Kukri_c18258_440	IWB41929	KUtE_C_2017	FASTmrMLM	3A	714425105	8.3006	9.2002
		Kukri_c18258_440	IWB41929	KUE_C_2017	FASTmrMLM	3A	714425105	6.9643	7.8278
		Kukri_c18258_440	IWB41929	KUE_C_2017	pLARmEB	3A	714425105	6.9213	7.7835
	29	GENE-2081_34	IWB32795	SL_C_H	mrMLM	3A	735891449	9.1378	10.0573
		GENE-2081_34	IWB32795	SL_C_H	pLARmEB	3A	735891449	9.7763	10.7099
	30	wsnp_Ku_c5359_9530161	IWA7157	RW_C_H	FASTmrMLM	3A	744436134	5.5018	6.3172
		wsnp_Ku_c5359_9530161	IWA7157	RW_C_H	pLARmEB	3A	744436134	5.842	6.6696
	31	BS00011806_51	IWB6475	RL_T_2017	mrMLM	3B	35322028	5.4151	6.22732
		BS00011806_51	IWB6475	RL_T_2017	FASTmrMLM	3B	35322028	6.3793	7.2248
	32	wsnp_Ex_c1116_2138756	IWA1449	KUtE_C_2018	pLARmEB	3B	462099622	7.4118	8.2881
		wsnp_Ex_c1116_2138756	IWA1449	KUE_C_2018	FASTmrMLM	3B	462099622	10.7723	11.7261
	33	wsnp_BF145459D_Ta_2_1	IWA410	KUE_T_2017	pLARmEB	4D	453220983	11.6395	12.6094
		wsnp_BF145459D_Ta_2_1	IWA410	KUE_C_2018	FASTmrMLM	4D	453220983	14.9489	15.9546
		wsnp_BF145459D_Ta_2_1	IWA410	KUE_C_2018	pLARmEB	4D	453220983	5.6214	6.4412
		wsnp_BF145459D_Ta_2_1	IWA410	SW_T_H	FASTmrMLM	4D	453220983	10.7424	11.6956
	34	RAC875_c47328_483	IWB58342	Chl_C_2018	FASTmrMLM	4D	494056241	6.1772	7.0162
		RAC875_c47328_483	IWB58342	Chl_C_2018	pLARmEB	4D	494056241	5.5666	6.3844
	35	BS00101071_51	IWB12158	RL_T_H	FASTmrMLM	5A	8059402	6.5007	7.3501
		BS00101071_51	IWB12158	RL_T_H	pLARmEB	5A	8059402	5.6623	6.4836
		BS00101071_51	IWB12158	RW_T_H	pLARmEB	5A	8059402	5.2505	6.0565
	36	BS00003618_51	IWB5849	TN_C_2017	FASTmrMLM	5A	482119825	5.3924	6.2038
		BS00003618_51	IWB5849	TN_C_2017	pLARmEB	5A	482119825	8.8448	9.7576
	37	Excalibur_c13536_202	IWB22285	SpL_C_2018	pLARmEB	5B	34039822	6.461	7.3091
		Excalibur_c13536_202	IWB22285	KUE_C_2018	FASTmrMLM	5B	34039822	11.4679	12.4348
	38	RAC875_c45619_224	IWB58160	KUtE_T_2017	pLARmEB	5B	64733088	12.2149	13.1949
		RAC875_c45619_224	IWB58160	KUE_C_2018	FASTmrMLM	5B	64733088	5.0989	5.899
	39	Excalibur_c7286_975	IWB28646	Zn_T_2017	FASTmrMLM	5B	72099969	5.7416	6.5657
		Excalibur_c7286_975	IWB28646	Zn_T_2017	pLARmEB	5B	72099969	5.0072	5.8036
	40	Ku_c2346_1339	IWB38863	KUtE_T_2017	pLARmEB	5B	536515270	8.6192	9.5266
		Ku_c2346_1339	IWB38863	KUE_C_2018	FASTmrMLM	5B	536515270	8.4331	9.336
		Ku_c2346_1339	IWB38863	KUE_C_2018	pLARmEB	5B	536515270	15.0691	15.9546
	41	BS00029915_51	IWB7750	KUtE_C_2017	pLARmEB	5B	558346572	5.2551	6.0613
		BS00029915_51	IWB7750	KUE_T_2018	FASTmrMLM	5B	558346572	5.7685	6.5935
	42	Excalibur_c54637_123	IWB27497	KUE_T_2018	FASTmrMLM	5B	689375749	10.1571	11.0986
		Excalibur_c54637_123	IWB27497	KUE_T_2018	pLARmEB	5B	689375749	9.1727	10.093
	43	RAC875_c20530_1159	IWB55010	KUtE_T_2018	FASTmrMLM	5D	478466774	6.8053	7.664
		RAC875_c20530_1159	IWB55010	KUtE_T_2018	pLARmEB	5D	478466774	6.9813	7.8453
	44	Excalibur_c64989_250	IWB28338	KUtE_C_2018	pLARmEB	6A	12392149	5.8304	6.6576
		Excalibur_c64989_250	IWB28338	KUE_C_2018	FASTmrMLM	6A	12392149	13.7354	14.7505
		Excalibur_c64989_250	IWB28338	KUE_C_2018	pLARmEB	6A	12392149	7.5175	8.3967
	45	wsnp_Ex_c48789_53586502	IWA4036	BY_C_2017	mrMLM	6A	550073992	6.4027	7.24897
		wsnp_Ex_c48789_53586502	IWA4036	BY_C_2017	FASTmrMLM	6A	550073992	5.2139	6.0185
		wsnp_Ex_c48789_53586502	IWA4036	BY_C_2017	pLARmEB	6A	550073992	5.2139	6.0185
		wsnp_Ex_c48789_53586502	IWA4036	KUE_C_2017	pLARmEB	6A	550073992	10.615	11.5657
	46	wsnp_Ra_c13998_21994095	IWA7621	KUE_C_2018	FASTmrMLM	6A	615458409	5.869	6.6975
		wsnp_Ra_c13998_21994095	IWA7621	KUE_C_2018	pLARmEB	6A	615458409	12.0528	13.0303
	47	BS00022772_51	IWB7251	KUtE_T_2018	FASTmrMLM	6B	240543564	11.1665	12.1278
		BS00022772_51	IWB7251	KUE_T_2018	pLARmEB	6B	240543564	15.1782	15.9546
	48	IAAV7251	IWB35315	FW_C_H	FASTmrMLM	6D	309588003	6.1501	6.9882
		IAAV7251	IWB35315	Na+_C_2018	pLARmEB	6D	309588003	5.259	6.0653
	49	GENE-3593_37	IWB33486	DM_C_2018	mrMLM	7A	1699666	6.3598	7.2047
		GENE-3593_37	IWB33486	DM_C_2018	FASTmrMLM	7A	1699666	6.3607	7.2056
		GENE-3593_37	IWB33486	DM_C_2018	pLARmEB	7A	1699666	6.3607	7.2056
		GENE-3593_37	IWB33486	FW_T_H	pLARmEB	7A	1699666	10.0781	11.018
	50	BS00009838_51	IWB6125	KUE_C_2017	FASTmrMLM	7A	666607524	14.0126	15.0003
		BS00009838_51	IWB6125	KUE_C_2017	pLARmEB	7A	666607524	6.5296	7.3799
	51	Ku_c9598_2119	IWB40173	TN_T_2017	mrMLM	7B	159141848	5.1318	5.93317
		Ku_c9598_2119	IWB40173	TN_T_2017	FASTmrMLM	7B	159141848	5.1714	5.9743
	52	CAP7_c9278_185	IWB14320	KUtE_T_2018	FASTmrMLM	7D	146106813	7.4625	8.3402
		CAP7_c9278_185	IWB14320	KUtE_T_2018	pLARmEB	7D	146106813	5.5462	6.3633
	aSNP ID on reference genome IWGSC RefSeq v1.1.
	*Trait nomenclature is presented in Table 2 legends.
	†SNP position on reference genome IWGSC RefSeq v1.1.
