# Supplementary material for: Genome-Wide Association Study and QTL Meta-Analysis Identified Novel Genomic Loci Controlling Potassium Use Efficiency and Agronomic Traits in Bread Wheat
Source: Front Plant Sci. 2020 Feb 18;11:70. doi: 10.3389/fpls.2020.00070 (PMC7041172; doi:10.3389/fpls.2020.00070)
Supplement: Supplementary file 9 [file Table_9.xlsx]

## Sheet: Table S9
	Table S9. QTL projected to WCGM 2017 to calculate MQTL.
	Sno	Mapname	QTL	Chr	Position*
	1			1A	0
	2	Kong et al. (2013)	QHtkue	1A	23-25
	3	Kong et al. (2013)	QHrkc	1A	25-32
	4	Kong et al. (2013)	QHskc	1A	25-32
	5	Kong et al. (2013)	QHtkc	1A	25-32
	6	Gong et al. (2015)	QRkue	1A	28-32
	7	Gong et al. (2015)	QRskc	1A	28-32
	8	Gong et al. (2015)	QRkue	1A	30-35
	9	Gong et al. (2015)	QSkue	1A	30-35
	10	Gong et al. (2015)	QTkue	1A	32-35
	11	Gong et al. (2015)	QRkc	1A	35-40
	12	Gong et al. (2015)	QSkc	1A	35-40
	13	Gong et al. (2015)	QTkc	1A	35-40
	14	Gong et al. (2015)	QTkue	1A	35-40
	15	Zhao et al. (2014)	QTRV	1A	75-79
	16	Zhao et al. (2014)	QNCR	1A	75-79
	17	Gong et al. (2015)	QRskc	1A	80-83
	18	Gong et al. (2015)	QRkce	1A	83-90
	19			1A	215.867
	20			1B	0
	21	Guo et al. (2012)	QRkc	1B	40-42
	22	Guo et al. (2012)	QArn	1B	40-47
	23	Guo et al. (2012)	QSkc	1B	40-47
	24	Guo et al. (2012)	QTkc	1B	40-47
	25	Guo et al. (2012)	QTkue	1B	40-47
	26	Guo et al. (2012)	QRkue	1B	41-47
	27	Guo et al. (2012)	QSkue	1B	43-47
	28	Gong et al. (2015)	QRkce	1B	45-48
	29	Zhao et al. (2014)	QTRV	1B	60-66
	30			1B	191.005
	31			1D	0
	32	Gong et al. (2015)	QSkc	1D	40-47
	33	Kong et al. (2013)	QPtgw	1D	54-56
	34	Zhao et al. (2014)	QTRL	1D	47-68
	35	Zhao et al. (2014)	QNCR	1D	47-68
	36	Gong et al. (2015)	QTkce	1D	68-69
	37			1D	276.27
	38			2A	0
	39	Kong et al. (2013)	QPgn	2A	115-120
	40	Gong et al. (2015)	QRkc	2A	149-154
	41	Zhao et al. (2014)	QTRV	2A	150-154
	42	Gong et al. (2015)	QRkc	2A	155-160
	43	Gong et al. (2015)	QSkue	2A	155-160
	44	Gong et al. (2015)	QTkc	2A	155-160
	45			2A	221.589
	46			2B	0
	47	Gong et al. (2015)	QSkc	2B	62-68
	48	Gong et al. (2015)	QTkue	2B	62-68
	49	Gong et al. (2015)	QSkce	2B	65-68
	50	Gong et al. (2015)	QTkc	2B	65-68
	51	Gong et al. (2015)	QRkc	2B	202-208
	52			2B	202.917
	53			2D	0
	54	Gong et al. (2015)	QTkc	2D	55-73
	55	Kong et al. (2013)	QPgn	2D	154-177
	56			2D	262.327
	57			3A	0
	58	Gong et al. (2015)	QRkue	3A	60-65
	59	Gong et al. (2015)	QRskc	3A	60-65
	60	Gong et al. (2015)	QTkue	3A	60-65
	61	Kong et al. (2013)	QPtgw	3A	62-66
	62	Kong et al. (2013)	QFtgw	3A	62-66
	63	Gong et al. (2015)	QRkce	3A	62-67
	64	Gong et al. (2015)	QSkc	3A	132-135
	65	Gong et al. (2015)	QSkue	3A	132-135
	66	Gong et al. (2015)	QTkc	3A	132-135
	67			3A	265.649
	68			3B	0
	69	Gong et al. (2015)	QTkce	3B	19-25
	70	Zhao et al. (2014)	QNCS	3B	19-35
	71	Gong et al. (2015)	QSkc	3B	19-28
	72	Gong et al. (2015)	QTkc	3B	19-28
	73	Zhao et al. (2014)	QTRL	3B	68-73
	74	Gong et al. (2015)	QRskc	3B	63-87
	75	Gong et al. (2015)	QSkue	3B	84-90
	76	Gong et al. (2015)	QRkc	3B	87-88
	77	Gong et al. (2015)	QSkue	3B	87-88
	78			3B	223.13
	79			3D	0
	80	Gong et al. (2015)	QSkce	3D	75-81
	81			3D	192.381
	82			4A	0
	83	Gong et al. (2015)	QRskc	4A	60-67
	84	Gong et al. (2015)	QTkce	4A	60-67
	85	Gong et al. (2015)	QRskc	4A	103-110
	86	Guo et al. (2012)	QRkc	4A	103-114
	87	Gong et al. (2015)	QRskc	4A	140-146
	88	Zhao et al. (2014)	QKCR	4A	144-150
	89	Gong et al. (2015)	QRkce	4A	146-156
	90	Gong et al. (2015)	QRkue	4A	154-160
	91	Gong et al. (2015)	QSkce	4A	154-160
	92	Gong et al. (2015)	QTkce	4A	154-160
	93	Zhao et al. (2014)	QKCS	4A	171-172
	94	Zhao et al. (2014)	QKCR	4A	170-184
	95	Gong et al. (2015)	QRkce	4A	215-220
	96			4A	233.918
	97			4B	0
	98	Gong et al. (2015)	QSkc	4B	80-85
	99	Gong et al. (2015)	QSkue	4B	80-85
	100	Gong et al. (2015)	QTkc	4B	80-85
	101	Guo et al. (2012)	QArn	4B	83-88
	102	Gong et al. (2015)	QRkue	4B	87-88
	103	Zhao et al. (2014)	QTRV	4B	88-100
	104	Gong et al. (2015)	QRkc	4B	106-113
	105	Gong et al. (2015)	QRkce	4B	106-113
	106	Gong et al. (2015)	QTkc	4B	106-113
	107	Gong et al. (2015)	QTkce	4B	106-113
	108			4B	144.577
	109			4D	0
	110			4D	154.064
	111			5A	0
	112	Gong et al. (2015)	QRkue	5A	122-125
	113			5A	252.078
	114			5B	0
	115	Gong et al. (2015)	QSkc	5B	96-100
	116	Gong et al. (2015)	QTkce	5B	96-100
	117	Zhao et al. (2014)	QTRL	5B	96-100
	118	Gong et al. (2015)	QRkue	5B	150-163
	119	Zhao et al. (2014)	QTRL	5B	168-176
	120	Zhao et al. (2014)	QTRV	5B	168-176
	121	Gong et al. (2015)	QTkce	5B	180-184
	122	Zhao et al. (2014)	QKCS	5B	176-197
	123			5B	229.772
	124			5D	0
	125	Zhao et al. (2014)	QNCS	5D	230-236
	126			5D	315.376
	127			6A	0
	128	Zhao et al. (2014)	QNCS	6A	70-75
	129	Zhao et al. (2014)	QNCR	6A	75-80
	130	Gong et al. (2015)	QRskc	6A	90-95
	131	Kong et al. (2013)	QFtgw	6A	146-147
	132	Gong et al. (2015)	QRkue	6A	147-150
	133	Gong et al. (2015)	QSkc	6A	147-150
	134	Gong et al. (2015)	QRkue	6A	148-152
	135			6A	181.27
	136			6B	0
	137	Gong et al. (2015)	QRkce	6B	30-37
	138	Gong et al. (2015)	QRkc	6B	32-37
	139	Kong et al. (2013)	QFtgw	6B	33-37
	140	Zhao et al. (2014)	QTRL	6B	71-75
	141	Gong et al. (2015)	QSkc	6B	206-209
	142	Gong et al. (2015)	QSkue	6B	206-209
	143	Gong et al. (2015)	QTkc	6B	206-209
	144	Gong et al. (2015)	QTkue	6B	206-210
	145			6B	209.185
	146			6D	0
	147	Zhao et al. (2014)	QCHL	6D	17-25
	148	Gong et al. (2015)	QRkue	6D	170-175
	149			6D	241.11
	150			7A	0
	151	Guo et al. (2012)	QArn	7A	42-65
	152	Gong et al. (2015)	QRskc	7A	58-59
	153	Gong et al. (2015)	QSkc	7A	59-66
	154	Gong et al. (2015)	QTkc	7A	110-113
	155	Gong et al. (2015)	QSkc	7A	116-120
	156			7A	334.851
	157			7B	0
	158	Gong et al. (2015)	QTkce	7B	70-78
	159	Gong et al. (2015)	QRkc	7B	120-140
	160	Gong et al. (2015)	QRkce	7B	120-140
	161	Gong et al. (2015)	QTkc	7B	120-140
	162	Gong et al. (2015)	QSkce	7B	178-182
	163	Zhao et al. (2014)	QKCS	7B	186-200
	164	Zhao et al. (2014)	QKCR	7B	186-200
	165	Gong et al. (2015)	QSkc	7B	239-245
	166	Gong et al. (2015)	QTkue	7B	239-245
	167			7B	288.605
	168			7D	0
	169	Gong et al. (2015)	QSkce	7D	108-118
	170	Gong et al. (2015)	QTkc	7D	108-118
	171	Kong et al. (2013)	QHtkue	7D	168-189
	172			7D	267.862
	*QTL position (cM) on WCGM 2017
